# Supplementary material for: Proteome evaluation of the biological activity of grape seed extract (GSE) on the intestine of rats
Source: Royal Society of Chemistry journal article supplement (doi:10.1039/d4fo05133e), 2025-01-01
Supplement: d4fo05133e1.pdf [file d4fo05133e1.pdf]

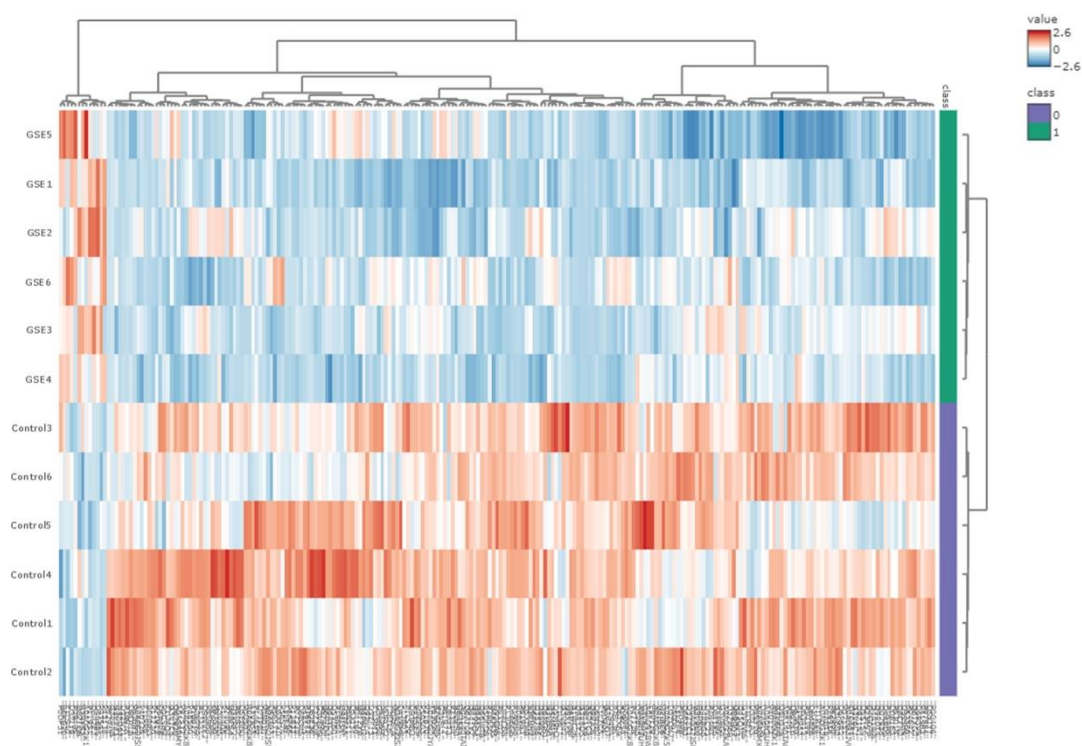

**Supplemental Figure 1. Heatmap of differentially expressed proteins comparing Control with GSE treatment.** A complete heatmap illustrating the effect of GSE supplementation on the 237 significantly dysregulated proteins (p-value < 0.05) in ileum samples with the magnitude of change indicated by the color scale on the right. Control samples are indicated on purple and GSE treated samples in green in the right line of the heatmap.

**Supplemental Table 1.** The most differentially overrepresented and underrepresented proteins ( $\log_2FC < -2$ ) represented in the figure 2.

| <b>Up-regulated proteins</b>                     |                                                      |
|--------------------------------------------------|------------------------------------------------------|
| <b>Protein name</b>                              | <b>Protein identified (Uniprot accession number)</b> |
| ATP-binding cassette subfamily A member 13       | D4A885                                               |
| 60S ribosomal protein L28                        | Q642E2                                               |
| Heat shock protein beta-6                        | P97541                                               |
| DNA-(apurinic or apyrimidinic site) endonuclease | P43138                                               |
| Collagen alpha-2(I) chain                        | F1LS40                                               |
| Apolipoprotein E                                 | A0A0G2K151                                           |
| Cytochrome c oxidase subunit 6C-2                | P11951                                               |
| Histone H2B                                      | D3ZLY9                                               |
| Cytochrome b-c1 complex subunit 7                | B2RYS2                                               |
| Calmodulin-3                                     | P0DP31                                               |
| Tropomyosin alpha-4 chain                        | P09495                                               |
| Cytochrome c-1                                   | D3ZFAQ8                                              |
| CDGSH iron-sulfur domain-containing protein 1    | B0K020                                               |
| <b>Down-regulated proteins</b>                   |                                                      |
| <b>Protein name</b>                              | <b>Protein identified (Uniprot accession number)</b> |
| RNA helicase                                     | D3ZD97                                               |
| 6-phosphogluconolactonase                        | G3V8D5                                               |
| Adenine phosphoribosyltransferase                | P36972                                               |
| 40S ribosomal protein S19                        | D4A6G6                                               |
| AP-2 complex subunit beta                        | P62944                                               |
| TAP-binding protein                              | Q99JC6                                               |
| Activator of Hsp90 ATPase activity 1             | B0BN63                                               |
| Aflatoxin B1 aldehyde reductase member 3         | P38918                                               |
| Protein transport protein SEC23                  | B5DFC3                                               |
| 60S acidic ribosomal protein P1                  | P19944                                               |
| Lambda-crystallin homolog                        | Q811X6                                               |
| 40S ribosomal protein S5                         | B0BN81                                               |
| Isocitrate dehydrogenase [NAD] subunit           | Q5XIJ3                                               |
| N-acetylneuraminase synthase                     | B1WC26                                               |
| Pyridoxal kinase                                 | G3V647                                               |
| Transmembrane emp24 domain-containing protein 10 | Q63584                                               |
| Calcium-activated neutral proteinase 1           | F1LS29                                               |
| Ras-related protein Rab-1A                       | Q6NYB7                                               |
| Ribosomal protein S10-like 1                     | F1LT36                                               |
| Proteasome subunit alpha type-2                  | P17220                                               |

|                                                     |        |
|-----------------------------------------------------|--------|
| Clathrin-assembly lymphoid myeloid leukemia protein | Q66WT9 |
| Sorbin and SH3 domain-containing protein 2          | F1LPM3 |
| Protein NDRG1                                       | Q6JE36 |
| Fructose-1,6-bisphosphatase isozyme 2               | Q9Z1N1 |

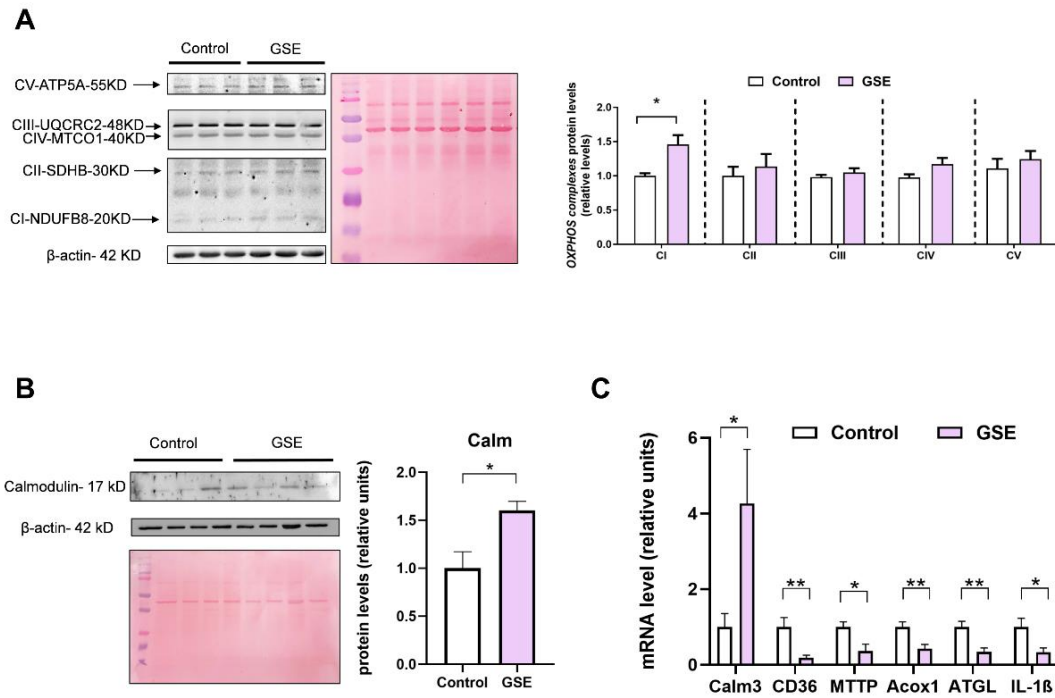

**Supplemental Figure 2. Proteomic Data Validation.** A. Effect of GSE on the protein level of OXPHOS subunits (Complex I-V) in ileal samples from Control (n=3) and GSE-supplemented rats (n=3). B. Effect of GSE on the protein level of Calm, in ileal samples from Control (n=6) and GSE-supplemented rats (n=6). Data from WB analysis represent means  $\pm$  SEM of 2 separate experiments. Student's t test. \*P < 0.05, \*\*P < 0.01. C. Effect of GSE on the mRNA level of Calm3, CD36, MTPP, ATGL, Acox1 and IL-1 $\beta$  in ileal samples from Control (n=6) and GSE-supplemented rats (n=6). Data represent means  $\pm$  SEM. Student's t test. \*P < 0.05, \*\*P < 0.01.
