# Supplementary material for: Proteome evaluation of the biological activity of grape seed extract (GSE) on the intestine of rats
Source: Royal Society of Chemistry journal article supplement (doi:10.1039/d4fo05133e), 2025-01-01
Supplement: d4fo05133e5.xlsx [file d4fo05133e5.xlsx]

## Sheet: Proteins areas
Supplementary Data 1. Ileum proteomics analysis.
Row	Peak Name	Group	SW_Control-15	SW_Control-16	SW_Control-18	SW_Control-22	SW_Control-23	SW_Control-24	SW_GSE-3-2	SW_GSE-5	SW_GSE-6	SW_GSE-8	SW_GSE-10	SW_GSE-11
1	tr|E9PTU4|E9PTU4_RAT	Myosin-11 OS=Rattus norvegicus OX=10116 GN=Myh11 PE=1 SV=2	29896.8	36864.7	38272.8	20569.7	50766.4	49985.3	29119.6	33880.4	39831.3	46032.7	17080.4	38572.4
2	tr|C0JPT7|C0JPT7_RAT	Filamin A OS=Rattus norvegicus OX=10116 GN=Flna PE=1 SV=1	658506	1.94169e+06	1.08107e+06	603200	996972	1.42858e+06	657823	578631	505552	985967	369310	837920
3	tr|G3V6P7|G3V6P7_RAT	Myosin, heavy polypeptide 9, non-muscle OS=Rattus norvegicus OX=10116 GN=Myh9 PE=1 SV=1	430490	446608	448524	381553	494076	558568	429257	510118	507485	484321	330649	563003
4	tr|F1LZF4|F1LZF4_RAT	Collagen type VI alpha 5 chain OS=Rattus norvegicus OX=10116 GN=Col6a5 PE=1 SV=3	293936	627286	379685	307120	547784	686753	185928	283493	284482	253747	105086	214063
5	tr|G3V852|G3V852_RAT	RCG55135, isoform CRA_b OS=Rattus norvegicus OX=10116 GN=Tln1 PE=1 SV=1	115056	134003	157083	139547	169768	119165	93258.1	100059	84301.4	95448.7	109156	123279
6	tr|A0A0G2JSH5|A0A0G2JSH5_RAT	Albumin OS=Rattus norvegicus OX=10116 GN=Alb PE=1 SV=1	146704	467065	134607	102214	24510.9	9782.62	7130.51	79419.2	160680	258881	8164.18	10304.7
7	tr|Q6T487|Q6T487_RAT	Alpha-actinin-1 OS=Rattus norvegicus OX=10116 GN=Actn1 PE=1 SV=1	310670	377328	372032	384147	498820	278245	248489	321512	314725	342133	292021	355000
8	tr|R9PXU6|R9PXU6_RAT	Metavinculin OS=Rattus norvegicus OX=10116 GN=Vcl PE=1 SV=1	348615	441666	452229	465139	653180	356749	363259	400861	410190	388720	518461	478843
9	tr|D3ZJF8|D3ZJF8_RAT	Fc fragment of IgG-binding protein OS=Rattus norvegicus OX=10116 GN=Fcgbp PE=1 SV=3	640463	448929	553584	295689	42174.6	244602	254404	402381	561551	426052	65983.2	114487
10	tr|F1M779|F1M779_RAT	Clathrin heavy chain OS=Rattus norvegicus OX=10116 GN=Cltc PE=1 SV=1	217422	192538	215351	124025	123478	197165	161978	204517	195491	203017	82215	141971
11	sp|P07756|CPSM_RAT	Carbamoyl-phosphate synthase [ammonia], mitochondrial OS=Rattus norvegicus OX=10116 GN=Cps1 PE=1 SV=1	245019	233453	256384	209102	122350	263892	207951	259237	237020	219581	82882.5	117011
12	tr|F1LNF0|F1LNF0_RAT	Myosin heavy chain 14 OS=Rattus norvegicus OX=10116 GN=Myh14 PE=1 SV=1	171647	68049.4	120833	99111.5	41403.8	80766.2	85426.8	187886	97605.1	74559.2	62691.4	51437.7
13	tr|A0A0G2K1E7|A0A0G2K1E7_RAT	Spectrin alpha chain, non-erythrocytic 1 OS=Rattus norvegicus OX=10116 GN=Sptan1 PE=1 SV=1	95881.1	94021.8	97889.1	103514	93756.7	93735.9	89306.2	120216	97860.1	90711.8	89392.5	88275.9
14	sp|Q63279|K1C19_RAT	Keratin, type I cytoskeletal 19 OS=Rattus norvegicus OX=10116 GN=Krt19 PE=1 SV=2	1.7152e+06	688201	1.04243e+06	1.1842e+06	356747	760111	999753	1.40424e+06	972689	928568	1.19363e+06	347700
15	tr|D3ZUL3|D3ZUL3_RAT	Collagen type VI alpha 1 chain OS=Rattus norvegicus OX=10116 GN=Col6a1 PE=1 SV=1	1.26418e+06	2.31832e+06	1.8895e+06	1.35848e+06	2.37046e+06	3.36079e+06	1.30381e+06	1.72793e+06	2.00232e+06	2.38907e+06	764986	1.85549e+06
16	sp|Q10758|K2C8_RAT	Keratin, type II cytoskeletal 8 OS=Rattus norvegicus OX=10116 GN=Krt8 PE=1 SV=3	5.52418e+06	2.06258e+06	3.30384e+06	3.67976e+06	1.01603e+06	2.17989e+06	3.09205e+06	3.51381e+06	1.7237e+06	2.25578e+06	4.52306e+06	1.41051e+06
17	sp|P05197|EF2_RAT	Elongation factor 2 OS=Rattus norvegicus OX=10116 GN=Eef2 PE=1 SV=4	450025	439194	487828	477403	357672	441270	468646	532389	490214	417908	293407	390466
18	tr|A0A0G2JWX9|A0A0G2JWX9_RAT	Chloride channel accessory 1 OS=Rattus norvegicus OX=10116 GN=Clca1 PE=3 SV=1	1.8404e+06	1.16736e+06	1.28737e+06	853141	231426	795443	1.10457e+06	1.17122e+06	1.44248e+06	1.44067e+06	619196	396774
19	tr|Q6P725|Q6P725_RAT	Desmin OS=Rattus norvegicus OX=10116 GN=Des PE=1 SV=1	1.70145e+06	2.8122e+06	3.38717e+06	2.13263e+06	3.88358e+06	1.77087e+06	2.21883e+06	2.35533e+06	2.38695e+06	3.33405e+06	4.11283e+06	3.53812e+06
20	tr|Q6IMZ3|Q6IMZ3_RAT	Annexin OS=Rattus norvegicus OX=10116 GN=Anxa6 PE=1 SV=1	349439	385751	377897	278330	491312	405783	343435	259242	405021	391382	288563	443740
21	tr|G3V8L3|G3V8L3_RAT	Lamin A, isoform CRA_b OS=Rattus norvegicus OX=10116 GN=Lmna PE=1 SV=1	436755	498526	539870	497157	582656	475667	484937	558737	514906	557992	560888	515956
22	tr|D3ZFU9|D3ZFU9_RAT	Myosin light chain kinase, smooth muscle OS=Rattus norvegicus OX=10116 GN=Mylk PE=1 SV=2	303996	458716	352464	337762	531419	296522	354807	397066	403594	469942	252126	439607
23	sp|P12346|TRFE_RAT	Serotransferrin OS=Rattus norvegicus OX=10116 GN=Tf PE=1 SV=3	243736	311498	308785	306720	128305	184727	242372	276741	279832	229829	63881.1	127535
24	sp|P34058|HS90B_RAT	Heat shock protein HSP 90-beta OS=Rattus norvegicus OX=10116 GN=Hsp90ab1 PE=1 SV=4	391089	430471	358165	379527	348285	408326	332940	486661	414866	354396	252698	299389
25	tr|A0A0H2UHM5|A0A0H2UHM5_RAT	Protein disulfide-isomerase OS=Rattus norvegicus OX=10116 GN=Pdia3 PE=1 SV=1	785055	681843	821913	854783	639617	737811	522059	860872	613857	524400	808903	708454
26	tr|F1LS40|F1LS40_RAT	Collagen alpha-2(I) chain OS=Rattus norvegicus OX=10116 GN=Col1a2 PE=1 SV=3	123499	323838	240358	123242	283530	425437	259686	257452	437244	509077	630819	699398
27	sp|P06761|BIP_RAT	Endoplasmic reticulum chaperone BiP OS=Rattus norvegicus OX=10116 GN=Hspa5 PE=1 SV=1	324753	285573	320081	257166	225841	373110	276686	391323	299396	327801	194892	314797
28	tr|G3V6D3|G3V6D3_RAT	ATP synthase subunit beta OS=Rattus norvegicus OX=10116 GN=Atp5f1b PE=1 SV=1	2.94715e+06	2.24992e+06	3.04165e+06	2.73316e+06	1.96954e+06	2.36254e+06	2.57616e+06	1.89748e+06	2.50253e+06	3.03953e+06	1.50454e+06	2.61839e+06
29	sp|P63269|ACTH_RAT	Actin, gamma-enteric smooth muscle OS=Rattus norvegicus OX=10116 GN=Actg2 PE=2 SV=1	774378	986541	1.17007e+06	927843	1.28469e+06	648657	560400	662163	660694	751367	826413	819800
30	sp|Q9ER34|ACON_RAT	Aconitate hydratase, mitochondrial OS=Rattus norvegicus OX=10116 GN=Aco2 PE=1 SV=2	303354	214627	384733	217328	243451	295806	302615	470156	375810	295348	169621	251328
31	tr|F1LNH3|F1LNH3_RAT	Collagen type VI alpha 2 chain OS=Rattus norvegicus OX=10116 GN=Col6a2 PE=1 SV=2	773682	1.54373e+06	763522	785667	1.11098e+06	1.07438e+06	805222	723663	971999	1.13803e+06	340994	621577
32	tr|Q5XI38|Q5XI38_RAT	Lymphocyte cytosolic protein 1 OS=Rattus norvegicus OX=10116 GN=Lcp1 PE=1 SV=1	132735	122090	105312	182338	205139	126374	128985	101110	65468.8	93559.3	163408	174483
33	tr|G3V7C6|G3V7C6_RAT	Tubulin beta chain OS=Rattus norvegicus OX=10116 GN=Tubb4b PE=1 SV=2	184611	111389	138069	154655	134938	133623	79255.9	108204	63484.1	75725.7	155842	116843
34	tr|A0A0G2K926|A0A0G2K926_RAT	Murinoglobulin-1 OS=Rattus norvegicus OX=10116 GN=LOC297568 PE=1 SV=1	270605	418633	265784	517898	293079	223912	227028	225805	342436	201323	175139	165809
35	sp|P46462|TERA_RAT	Transitional endoplasmic reticulum ATPase OS=Rattus norvegicus OX=10116 GN=Vcp PE=1 SV=3	284498	280812	274366	242602	196203	287024	218983	277349	243577	224572	112768	200247
36	tr|Q6S3A5|Q6S3A5_RAT	Plectin OS=Rattus norvegicus OX=10116 GN=Plec PE=1 SV=1	68063.2	51077.5	66790.9	63737.7	52968.7	51470.5	52657.2	70862.3	54811.1	55371.7	38856	51035.7
37	sp|Q07936|ANXA2_RAT	Annexin A2 OS=Rattus norvegicus OX=10116 GN=Anxa2 PE=1 SV=2	594470	455173	595932	509856	394869	543453	321007	453536	484882	444594	436308	398721
38	sp|P63018|HSP7C_RAT	Heat shock cognate 71 kDa protein OS=Rattus norvegicus OX=10116 GN=Hspa8 PE=1 SV=1	964210	914027	1.04099e+06	768652	665060	883928	720431	859719	759764	613155	369679	632480
39	sp|P15999|ATPA_RAT	ATP synthase subunit alpha, mitochondrial OS=Rattus norvegicus OX=10116 GN=Atp5f1a PE=1 SV=2	2.10257e+06	1.5641e+06	2.47816e+06	1.75834e+06	1.21428e+06	1.82454e+06	1.61629e+06	2.07627e+06	1.7238e+06	2.08232e+06	1.18894e+06	1.84187e+06
40	sp|P62630|EF1A1_RAT	Elongation factor 1-alpha 1 OS=Rattus norvegicus OX=10116 GN=Eef1a1 PE=2 SV=1	4.23887e+06	3.58031e+06	3.73927e+06	2.82755e+06	2.36641e+06	3.48469e+06	1.57074e+06	2.10351e+06	1.85625e+06	3.63756e+06	648468	2.57678e+06
41	sp|P11980|KPYM_RAT	Pyruvate kinase PKM OS=Rattus norvegicus OX=10116 GN=Pkm PE=1 SV=3	38390.3	41059.1	26938.4	28141.8	31248.7	31079.4	7674.26	12676.2	33884.6	19767.6	11865.6	23488.2
42	tr|A0A140TAE0|A0A140TAE0_RAT	Major vault protein OS=Rattus norvegicus OX=10116 GN=Mvp PE=1 SV=1	201309	164536	181872	138101	102346	169210	129605	185154	153317	116867	52438.8	98878
43	tr|D3ZSY4|D3ZSY4_RAT	Eosinophil peroxidase OS=Rattus norvegicus OX=10116 GN=Epx PE=1 SV=1	463797	616673	440734	363213	519245	851095	312688	336499	454777	474840	219645	426615
44	tr|Q9WVJ6|Q9WVJ6_RAT	Tissue-type transglutaminase OS=Rattus norvegicus OX=10116 GN=Tgm2 PE=1 SV=1	344090	559969	576135	257382	509729	667235	313685	338388	464363	552082	149496	542995
45	tr|A0A0G2K013|A0A0G2K013_RAT	Alpha-actinin-4 OS=Rattus norvegicus OX=10116 GN=Actn4 PE=1 SV=1	349013	314226	390804	382509	311352	321086	252095	360859	356917	251373	262147	234352
46	tr|B5DFA0|B5DFA0_RAT	Villin-1 OS=Rattus norvegicus OX=10116 GN=Vil1 PE=1 SV=1	474919	244276	522831	208018	83095.6	304633	271520	516784	390785	218737	73352.7	92356.3
47	tr|D3ZVR9|D3ZVR9_RAT	Phosphoglucomutase 5 OS=Rattus norvegicus OX=10116 GN=Pgm5 PE=1 SV=3	305956	419519	364579	367136	376988	343402	333242	351042	402683	357388	289598	353941
48	sp|P02454|CO1A1_RAT	Collagen alpha-1(I) chain OS=Rattus norvegicus OX=10116 GN=Col1a1 PE=1 SV=5	95302.9	189720	116453	114226	169541	171718	60688.4	116989	156179	94220.9	135111	135196
49	tr|G3V7I5|G3V7I5_RAT	Aldehyde dehydrogenase X, mitochondrial OS=Rattus norvegicus OX=10116 GN=Aldh1b1 PE=1 SV=1	634862	454797	575192	487883	311574	418874	413437	640968	543423	369161	296807	218251
50	tr|D4A8G5|D4A8G5_RAT	Transforming growth factor-beta-induced protein ig-h3 OS=Rattus norvegicus OX=10116 GN=Tgfbi PE=1 SV=2	191639	290220	281334	214002	305358	275432	154054	207931	217451	226811	136298	220168
51	sp|P10860|DHE3_RAT	Glutamate dehydrogenase 1, mitochondrial OS=Rattus norvegicus OX=10116 GN=Glud1 PE=1 SV=2	530580	432639	545920	371404	286186	443110	411408	572388	483387	397499	155743	347523
52	sp|P50137|TKT_RAT	Transketolase OS=Rattus norvegicus OX=10116 GN=Tkt PE=1 SV=1	310539	294391	301874	190066	162935	321201	232110	304139	256518	208424	80113.7	190878
53	sp|P50399|GDIB_RAT	Rab GDP dissociation inhibitor beta OS=Rattus norvegicus OX=10116 GN=Gdi2 PE=1 SV=2	250827	231303	234729	222276	172155	234426	87460.3	142723	180898	168348	71650.3	169690
54	tr|M0R5J4|M0R5J4_RAT	2-phospho-D-glycerate hydro-lyase OS=Rattus norvegicus OX=10116 PE=3 SV=1	431958	434771	505543	732302	580055	464834	409383	503829	374713	378652	353532	269793
55	sp|P04785|PDIA1_RAT	Protein disulfide-isomerase OS=Rattus norvegicus OX=10116 GN=P4hb PE=1 SV=2	217440	187126	213240	181020	130776	213951	142337	218252	164333	107773	97940.1	128514
56	sp|P25030|K1C20_RAT	Keratin, type I cytoskeletal 20 OS=Rattus norvegicus OX=10116 GN=Krt20 PE=1 SV=2	214358	68136.9	144094	138660	37375.5	82798.2	119967	207636	123542	85640.9	100196	39116.9
57	sp|Q62635|MUC2_RAT	Mucin-2 (Fragment) OS=Rattus norvegicus OX=10116 GN=Muc2 PE=1 SV=1	90876.5	124436	261682	97970.2	30324.8	48124.5	80708.7	130310	195253	92895.3	15758	18208
58	sp|P63039|CH60_RAT	60 kDa heat shock protein, mitochondrial OS=Rattus norvegicus OX=10116 GN=Hspd1 PE=1 SV=1	333328	170057	217415	299153	198035	218206	232062	269372	143917	196873	373467	244545
59	sp|P07335|KCRB_RAT	Creatine kinase B-type OS=Rattus norvegicus OX=10116 GN=Ckb PE=1 SV=2	1.30529e+06	1.93443e+06	1.47728e+06	2.08845e+06	1.73538e+06	987508	487037	535167	898896	465909	961798	790534
60	sp|P06685|AT1A1_RAT	Sodium/potassium-transporting ATPase subunit alpha-1 OS=Rattus norvegicus OX=10116 GN=Atp1a1 PE=1 SV=1	367343	311941	343826	214319	94800.2	293771	240372	304341	374574	300005	94704.4	110354
61	tr|G3V7Q7|G3V7Q7_RAT	IQ motif containing GTPase activating protein 1 (Predicted), isoform CRA_b OS=Rattus norvegicus OX=10116 GN=Iqgap1 PE=1 SV=1	123738	106222	112207	121323	87356	116208	46200.9	53769.7	54278	45843.6	49901.4	102477
62	tr|A0A0A0MY09|A0A0A0MY09_RAT	Endoplasmin OS=Rattus norvegicus OX=10116 GN=Hsp90b1 PE=1 SV=1	439356	445839	407457	418783	328651	557295	344597	427283	387831	390773	319027	374134
63	tr|Q5U362|Q5U362_RAT	Annexin OS=Rattus norvegicus OX=10116 GN=Anxa4 PE=1 SV=1	295535	240750	279650	344770	176243	244303	196681	277370	288866	183505	176128	178015
64	sp|P05065|ALDOA_RAT	Fructose-bisphosphate aldolase A OS=Rattus norvegicus OX=10116 GN=Aldoa PE=1 SV=2	264403	280344	258063	282029	253847	234073	206726	270501	202476	220283	270620	220594
65	sp|P04636|MDHM_RAT	Malate dehydrogenase, mitochondrial OS=Rattus norvegicus OX=10116 GN=Mdh2 PE=1 SV=2	909549	794976	882225	783005	669329	833874	676408	935788	806735	641839	382131	538678
66	tr|G3V9G5|G3V9G5_RAT	RCG24674, isoform CRA_b OS=Rattus norvegicus OX=10116 GN=Synm PE=1 SV=2	137998	179408	213731	152557	230243	126553	134046	134213	158137	157885	183863	176707
67	sp|Q6P502|TCPG_RAT	T-complex protein 1 subunit gamma OS=Rattus norvegicus OX=10116 GN=Cct3 PE=1 SV=1	166447	195852	208946	166995	213151	224901	121978	180755	167432	164607	124870	148241
68	tr|A0A1W2Q6E9|A0A1W2Q6E9_RAT	Moesin OS=Rattus norvegicus OX=10116 GN=Msn PE=1 SV=1	110013	105907	88073.6	80743.1	107133	103726	98898.2	85408.1	65108.2	90430.4	63138.2	121854
69	sp|Q5XI78|ODO1_RAT	2-oxoglutarate dehydrogenase, mitochondrial OS=Rattus norvegicus OX=10116 GN=Ogdh PE=1 SV=1	108187	97648.9	129656	85851.2	79416.6	105918	91294.4	110861	95333.8	89437.1	36671.3	77387.3
70	sp|P56574|IDHP_RAT	Isocitrate dehydrogenase [NADP], mitochondrial OS=Rattus norvegicus OX=10116 GN=Idh2 PE=1 SV=2	451886	491912	378293	329169	495123	297980	226470	246050	223876	264308	240585	496240
71	tr|B0BMS8|B0BMS8_RAT	Myl9 protein OS=Rattus norvegicus OX=10116 GN=Myl9 PE=1 SV=1	708372	1.1366e+06	683567	1.03571e+06	1.72136e+06	430932	618015	719137	961293	713525	1.15006e+06	1.07457e+06
72	tr|G3V8C3|G3V8C3_RAT	Vimentin OS=Rattus norvegicus OX=10116 GN=Vim PE=1 SV=1	645880	826380	780788	800147	1.06542e+06	933766	481227	679947	424387	572905	1.18258e+06	1.12826e+06
73	tr|A0A0G2QC04|A0A0G2QC04_RAT	Plastin 1 OS=Rattus norvegicus OX=10116 GN=Pls1 PE=1 SV=1	373009	157861	372115	280265	94456.8	204004	205630	342232	266240	126729	165456	75373
74	sp|Q5BJY9|K1C18_RAT	Keratin, type I cytoskeletal 18 OS=Rattus norvegicus OX=10116 GN=Krt18 PE=1 SV=3	306817	209214	213325	315263	155893	169044	181921	264685	141410	159852	225467	109785
75	tr|Q5U302|Q5U302_RAT	Catenin (Cadherin associated protein), alpha 1 OS=Rattus norvegicus OX=10116 GN=Ctnna1 PE=1 SV=1	109747	84364.8	75975.6	113254	68493.2	55852.2	74324.2	104232	82294.2	69436.8	95603.1	50566.5
76	sp|P55281|CAD17_RAT	Cadherin-17 OS=Rattus norvegicus OX=10116 GN=Cdh17 PE=2 SV=1	326119	184470	273448	203882	70227.4	152512	105082	237266	220468	129643	82554.8	73104.3
77	sp|P38552|LEG4_RAT	Galectin-4 OS=Rattus norvegicus OX=10116 GN=Lgals4 PE=1 SV=1	2.09002e+06	1.1829e+06	1.54345e+06	934404	339975	1.37645e+06	1.6813e+06	2.68682e+06	1.55759e+06	2.09589e+06	310297	749806
78	sp|P04182|OAT_RAT	Ornithine aminotransferase, mitochondrial OS=Rattus norvegicus OX=10116 GN=Oat PE=1 SV=1	530125	495075	535017	420304	338331	423661	386765	571318	582295	318634	202746	228713
79	tr|Q923Z2|Q923Z2_RAT	Tropomyosin 1, alpha, isoform CRA_a OS=Rattus norvegicus OX=10116 GN=Tpm1 PE=1 SV=1	474823	617962	685695	644760	1.06392e+06	357098	701836	699440	590746	805079	1.25914e+06	1.11342e+06
80	sp|P04642|LDHA_RAT	L-lactate dehydrogenase A chain OS=Rattus norvegicus OX=10116 GN=Ldha PE=1 SV=1	1.13879e+06	1.03597e+06	1.42234e+06	1.34418e+06	1.01738e+06	1.11874e+06	744077	971846	969304	693590	762040	609263
81	tr|G3V6Y6|G3V6Y6_RAT	Alpha-1,4 glucan phosphorylase OS=Rattus norvegicus OX=10116 GN=Pygb PE=1 SV=2	167313	200601	156077	131089	168778	142946	137389	146800	164029	160672	65509.3	128777
82	tr|D4ACB8|D4ACB8_RAT	CCT-theta OS=Rattus norvegicus OX=10116 GN=Cct8 PE=1 SV=1	122147	130941	138289	121141	144279	138861	77482.9	104917	84064.7	88888.4	76440.7	94056.4
83	sp|P16617|PGK1_RAT	Phosphoglycerate kinase 1 OS=Rattus norvegicus OX=10116 GN=Pgk1 PE=1 SV=2	595798	564535	590365	647351	517019	543720	402384	529256	438303	350004	369059	310087
84	sp|Q5U300|UBA1_RAT	Ubiquitin-like modifier-activating enzyme 1 OS=Rattus norvegicus OX=10116 GN=Uba1 PE=1 SV=1	104859	83277.7	90594.5	108652	90574.6	84854.6	86036	114850	77850.2	76916.4	43914.1	73245.3
85	sp|P00770|MCPT2_RAT	Mast cell protease 2 OS=Rattus norvegicus OX=10116 GN=Mcpt2 PE=1 SV=1	2.18735e+06	2.98165e+06	2.30529e+06	1.04187e+06	2.09385e+06	2.46519e+06	1.93818e+06	926058	2.33595e+06	2.42811e+06	523379	1.26311e+06
86	sp|P10760|SAHH_RAT	Adenosylhomocysteinase OS=Rattus norvegicus OX=10116 GN=Ahcy PE=1 SV=3	179513	172928	151332	128005	130682	156919	148118	164519	154496	148825	61263.9	127105
87	tr|F1LTJ5|F1LTJ5_RAT	Uncharacterized protein OS=Rattus norvegicus OX=10116 PE=1 SV=3	68844.9	132505	116267	41146.2	97196.8	75063.4	69707.9	67222.2	83654	125482	34695.6	102006
88	tr|F1M953|F1M953_RAT	75 kDa glucose-regulated protein OS=Rattus norvegicus OX=10116 GN=Hspa9 PE=1 SV=1	218715	202575	220852	194055	177265	209527	171127	188520	173029	201831	139161	180715
89	sp|P14668|ANXA5_RAT	Annexin A5 OS=Rattus norvegicus OX=10116 GN=Anxa5 PE=1 SV=3	378931	505350	434391	415052	707412	519148	278717	319770	409857	441664	389806	442420
90	tr|F1LN88|F1LN88_RAT	Aldehyde dehydrogenase, mitochondrial OS=Rattus norvegicus OX=10116 GN=Aldh2 PE=1 SV=2	347114	435644	391592	333803	337296	380303	229194	266027	304616	260417	181032	258758
91	sp|P04797|G3P_RAT	Glyceraldehyde-3-phosphate dehydrogenase OS=Rattus norvegicus OX=10116 GN=Gapdh PE=1 SV=3	1.03601e+06	915957	883726	1.05609e+06	810121	766890	939856	1.05606e+06	876815	786658	517428	698114
92	tr|Q6P3V8|Q6P3V8_RAT	RNA helicase OS=Rattus norvegicus OX=10116 GN=Eif4a1 PE=1 SV=1	289880	299646	309142	209258	199971	307002	239827	312953	281045	268985	125310	229809
93	tr|G3V7W7|G3V7W7_RAT	Aminopeptidase OS=Rattus norvegicus OX=10116 GN=Anpep PE=1 SV=2	184371	101980	193269	102978	37933.1	82089.6	86010.7	173308	115767	48486.8	42199.2	26917.9
94	tr|A0A0G2JWK7|A0A0G2JWK7_RAT	Transgelin OS=Rattus norvegicus OX=10116 GN=Tagln PE=1 SV=1	2.03552e+06	2.60346e+06	2.19103e+06	3.06239e+06	7.05352e+06	1.512e+06	4.46917e+06	1.87771e+06	1.99844e+06	4.77634e+06	7.09178e+06	2.80028e+06
95	sp|Q09073|ADT2_RAT	ADP/ATP translocase 2 OS=Rattus norvegicus OX=10116 GN=Slc25a5 PE=1 SV=3	71007.3	105824	62397.7	60433.5	74227	48670	1939.97	1187.68	67560.1	100833	36013.9	55301.7
96	sp|P48500|TPIS_RAT	Triosephosphate isomerase OS=Rattus norvegicus OX=10116 GN=Tpi1 PE=1 SV=2	297337	292417	295570	349507	288707	228018	257350	290381	249323	175858	252003	162274
97	tr|Q6P3V9|Q6P3V9_RAT	60S ribosomal protein L4 OS=Rattus norvegicus OX=10116 GN=Rpl4 PE=1 SV=1	383389	346484	325092	360394	281266	354164	176747	256321	343027	197681	166396	171659
98	sp|Q08163|CAP1_RAT	Adenylyl cyclase-associated protein 1 OS=Rattus norvegicus OX=10116 GN=Cap1 PE=1 SV=3	192096	190153	189657	152746	147524	164789	147486	168140	142175	118989	108416	121757
99	sp|P47942|DPYL2_RAT	Dihydropyrimidinase-related protein 2 OS=Rattus norvegicus OX=10116 GN=Dpysl2 PE=1 SV=1	230194	293632	283750	221624	301622	281199	216068	220470	261086	265544	128117	262039
100	sp|Q64428|ECHA_RAT	Trifunctional enzyme subunit alpha, mitochondrial OS=Rattus norvegicus OX=10116 GN=Hadha PE=1 SV=2	190733	177722	194398	173341	131044	152098	103135	144914	132844	131512	73190.4	125671
101	tr|A0A0G2K1C0|A0A0G2K1C0_RAT	Actin-related protein 3 OS=Rattus norvegicus OX=10116 GN=Actr3 PE=1 SV=1	241231	251949	251593	211881	213555	250583	176670	183901	213437	161162	116165	218734
102	sp|P10111|PPIA_RAT	Peptidyl-prolyl cis-trans isomerase A OS=Rattus norvegicus OX=10116 GN=Ppia PE=1 SV=2	805897	884751	713463	998811	988410	793448	972087	936726	898987	740634	2.24633e+06	962522
103	sp|P00507|AATM_RAT	Aspartate aminotransferase, mitochondrial OS=Rattus norvegicus OX=10116 GN=Got2 PE=1 SV=2	223567	223687	230145	239378	256565	200799	172878	193684	181925	188469	162697	214628
104	tr|Q499P2|Q499P2_RAT	Leukotriene A(4) hydrolase OS=Rattus norvegicus OX=10116 GN=Lta4h PE=1 SV=1	161177	145809	137854	91025.1	79511.6	153591	117380	136265	136637	99059.9	36236.5	82660.9
105	tr|Q9JKB7|Q9JKB7_RAT	Guanine deaminase OS=Rattus norvegicus OX=10116 GN=Gda PE=1 SV=1	248084	184044	210356	163920	112646	168285	116072	199181	189021	95004.5	67466.8	88955.9
106	tr|M0RBJ7|M0RBJ7_RAT	C3-beta-c OS=Rattus norvegicus OX=10116 GN=C3 PE=1 SV=1	67662.2	110514	98219	69329.6	54336.5	81190.8	50635.9	71047.7	85345.4	69994.5	38385.2	62702.6
107	sp|Q6URK4|ROA3_RAT	Heterogeneous nuclear ribonucleoprotein A3 OS=Rattus norvegicus OX=10116 GN=Hnrnpa3 PE=1 SV=1	182788	203523	217299	149801	135833	237539	186368	196008	199443	188893	75809.6	164118
108	tr|A0A0G2K3Z9|A0A0G2K3Z9_RAT	Peroxiredoxin-1 OS=Rattus norvegicus OX=10116 PE=3 SV=1	986016	902359	883530	597425	766195	944223	759759	979973	907200	698849	446859	628067
109	tr|F1M6H4|F1M6H4_RAT	Collagen, type VI, alpha 4 OS=Rattus norvegicus OX=10116 GN=Col6a4 PE=4 SV=3	82530.9	111476	111053	69333.1	131775	165261	90087.1	71186.1	76431.1	139021	21805.7	117571
110	sp|P62260|1433E_RAT	14-3-3 protein epsilon OS=Rattus norvegicus OX=10116 GN=Ywhae PE=1 SV=1	292021	288386	378614	348949	310745	312924	159432	258755	263129	170052	222562	190729
111	tr|Q6P9V7|Q6P9V7_RAT	Proteasome (Prosome, macropain) activator subunit 1 OS=Rattus norvegicus OX=10116 GN=Psme1 PE=1 SV=1	176773	141354	114425	208029	169784	105661	144453	182346	126269	83404.6	239426	119905
112	sp|Q6Q0N1|CNDP2_RAT	Cytosolic non-specific dipeptidase OS=Rattus norvegicus OX=10116 GN=Cndp2 PE=1 SV=1	270226	136192	195619	204527	86391.1	127496	140813	272429	180273	87266.1	133182	70397.3
113	tr|A0A0G2JSI1|A0A0G2JSI1_RAT	4-trimethylaminobutyraldehyde dehydrogenase OS=Rattus norvegicus OX=10116 GN=Aldh9a1 PE=1 SV=1	343522	267351	401428	208349	138888	277035	236446	366521	312377	203929	92486.6	129363
114	tr|D4A1W8|D4A1W8_RAT	Microsomal triglyceride transfer protein large subunit OS=Rattus norvegicus OX=10116 GN=Mttp PE=1 SV=1	188928	145398	221171	103752	44813.1	153769	63904.6	110492	88474.6	70439.1	18219.8	25441.6
115	tr|A0A0G2JUA5|A0A0G2JUA5_RAT	AHNAK nucleoprotein OS=Rattus norvegicus OX=10116 GN=Ahnak PE=1 SV=1	263639	125999	266175	195012	146210	179048	205555	169552	108615	205341	259930	288041
116	sp|P98089|MUC2L_RAT	Intestinal mucin-like protein (Fragment) OS=Rattus norvegicus OX=10116 PE=2 SV=1	392315	210484	293570	137088	17555.8	124060	206598	276989	317457	277177	29410.3	50150.4
117	sp|Q68FY0|QCR1_RAT	Cytochrome b-c1 complex subunit 1, mitochondrial OS=Rattus norvegicus OX=10116 GN=Uqcrc1 PE=1 SV=1	179503	160049	172941	162285	135481	152469	131144	161778	162359	165014	113089	126152
118	sp|Q9EQP5|PRELP_RAT	Prolargin OS=Rattus norvegicus OX=10116 GN=Prelp PE=2 SV=1	169474	344774	230331	222955	379680	195017	203150	207370	233516	247712	339252	336861
119	sp|Q5XIM9|TCPB_RAT	T-complex protein 1 subunit beta OS=Rattus norvegicus OX=10116 GN=Cct2 PE=1 SV=3	148126	168707	149398	185305	212058	163683	109307	158776	143068	118860	128579	108783
120	tr|G3V6S0|G3V6S0_RAT	Spectrin beta chain OS=Rattus norvegicus OX=10116 GN=Sptbn1 PE=1 SV=3	98688.4	105195	109514	98037.3	87948.1	75957.7	66251.3	88536.3	69069.8	89080.5	80599.3	88782.8
121	tr|A0A097BW25|A0A097BW25_RAT	Periostin OS=Rattus norvegicus OX=10116 GN=Postn PE=1 SV=1	103419	190609	210579	134389	296711	182493	98514.9	86272.9	102900	131492	79499.1	99069.1
122	tr|G3V7U4|G3V7U4_RAT	Lamin-B1 OS=Rattus norvegicus OX=10116 GN=Lmnb1 PE=1 SV=1	77623.8	62299.1	61256.9	75522.4	91616.2	77059.1	77148.1	77933.2	54928.2	78103.3	106426	83283.4
123	sp|Q920L2|SDHA_RAT	Succinate dehydrogenase [ubiquinone] flavoprotein subunit, mitochondrial OS=Rattus norvegicus OX=10116 GN=Sdha PE=1 SV=1	117409	107602	120400	67477.2	51863.5	111571	96430.9	112057	125977	121961	28547.8	77051.2
124	sp|Q68FP1|GELS_RAT	Gelsolin OS=Rattus norvegicus OX=10116 GN=Gsn PE=1 SV=1	190916	267441	249364	189220	286360	201428	183860	205041	242003	248720	168436	257648
125	sp|P51635|AK1A1_RAT	Aldo-keto reductase family 1 member A1 OS=Rattus norvegicus OX=10116 GN=Akr1a1 PE=1 SV=2	163206	147543	176964	217207	133424	154392	147191	161095	194351	123932	125004	124154
126	sp|Q66HF1|NDUS1_RAT	NADH-ubiquinone oxidoreductase 75 kDa subunit, mitochondrial OS=Rattus norvegicus OX=10116 GN=Ndufs1 PE=1 SV=1	171087	154096	189937	139926	125634	154009	111797	139452	143191	159125	92434.3	127744
127	sp|Q6P6V0|G6PI_RAT	Glucose-6-phosphate isomerase OS=Rattus norvegicus OX=10116 GN=Gpi PE=1 SV=1	136917	150628	126676	176238	161365	138294	77786.2	111183	85089.1	70659.1	79912.3	71649.8
128	sp|O54697|NALDL_RAT	Aminopeptidase NAALADL1 OS=Rattus norvegicus OX=10116 GN=Naaladl1 PE=1 SV=1	186936	96984.9	183077	172281	23334.5	66361.7	73713.8	198535	161069	70870.3	71650.4	28262.5
129	sp|Q7TPB1|TCPD_RAT	T-complex protein 1 subunit delta OS=Rattus norvegicus OX=10116 GN=Cct4 PE=1 SV=3	134653	157619	126767	138056	169784	102244	74697.5	109205	102526	87171.9	69394.5	80457
130	tr|A0A0G2K6J5|A0A0G2K6J5_RAT	Myosin light polypeptide 6 OS=Rattus norvegicus OX=10116 GN=Myl6 PE=1 SV=1	1.49874e+06	2.39812e+06	2.13256e+06	2.405e+06	4.45739e+06	1.37262e+06	1.69643e+06	1.63508e+06	2.06242e+06	1.98775e+06	2.49878e+06	2.97183e+06
131	tr|A0A0G2JSZ5|A0A0G2JSZ5_RAT	Protein disulfide-isomerase A6 OS=Rattus norvegicus OX=10116 GN=Pdia6 PE=1 SV=1	173053	174171	175612	187892	193478	115341	84714.1	87188.5	143441	132427	138369	146666
132	tr|F1LV10|F1LV10_RAT	Myosin IA OS=Rattus norvegicus OX=10116 GN=Myo1a PE=1 SV=2	142185	78577.9	133097	94829.6	32676.5	77520.3	78679.9	101891	111940	72143.9	21495.7	32838.4
133	sp|P17764|THIL_RAT	Acetyl-CoA acetyltransferase, mitochondrial OS=Rattus norvegicus OX=10116 GN=Acat1 PE=1 SV=1	110280	133505	169957	93535.1	135558	170136	103912	134778	132839	119608	90095.4	121898
134	sp|P51886|LUM_RAT	Lumican OS=Rattus norvegicus OX=10116 GN=Lum PE=1 SV=1	246609	568152	407484	270534	632925	415902	211794	250377	320218	361313	363126	425559
135	tr|D4A8D5|D4A8D5_RAT	Filamin B OS=Rattus norvegicus OX=10116 GN=Flnb PE=1 SV=1	78105.3	59344.8	86086.6	64794.7	65064.3	66673.7	51856	75785.8	54976	44407.4	27939	31425.6
136	tr|Q6AYI1|Q6AYI1_RAT	DEAD box protein 5 OS=Rattus norvegicus OX=10116 GN=Ddx5 PE=1 SV=1	92104.2	66900	72919.5	88992.5	82490.3	76601.4	69161.5	67841.5	50057.2	69688.9	76901.1	89886.2
137	tr|Q6P7A7|Q6P7A7_RAT	Dolichyl-diphosphooligosaccharide--protein glycosyltransferase subunit 1 OS=Rattus norvegicus OX=10116 GN=Rpn1 PE=1 SV=1	126234	113746	105240	75867.5	58309.7	100038	71041.5	93442.4	108229	111676	28972.1	62953.7
138	tr|Q5U328|Q5U328_RAT	Nucleolin OS=Rattus norvegicus OX=10116 GN=Ncl PE=1 SV=1	154250	159516	160839	170280	159585	169239	139631	148162	139175	142069	95911.9	150829
139	sp|P32551|QCR2_RAT	Cytochrome b-c1 complex subunit 2, mitochondrial OS=Rattus norvegicus OX=10116 GN=Uqcrc2 PE=1 SV=2	210113	185365	182640	196462	166048	156590	161056	213948	200550	204432	169428	148830
140	tr|F1MAA7|F1MAA7_RAT	Laminin subunit gamma 1 OS=Rattus norvegicus OX=10116 GN=Lamc1 PE=1 SV=1	55581.5	95502.7	100892	44107.9	80304.7	68493.5	50449.9	58255.8	76087.3	84119.4	24915.6	77994.1
141	tr|G3V6T7|G3V6T7_RAT	Protein disulfide-isomerase A4 OS=Rattus norvegicus OX=10116 GN=Pdia4 PE=1 SV=1	109433	100547	102326	95910.9	66253.3	117856	70613.5	104852	84929.7	72460.1	49123.3	79070.3
142	tr|F1LRJ9|F1LRJ9_RAT	Methanethiol oxidase OS=Rattus norvegicus OX=10116 GN=Selenbp1 PE=1 SV=2	239392	223393	216069	152154	123809	162064	91627.1	170988	206031	162841	43116.1	108265
143	tr|Q5XI34|Q5XI34_RAT	Protein phosphatase 2 (Formerly 2A), regulatory subunit A (PR 65), alpha isoform, isoform CRA_a OS=Rattus norvegicus OX=10116 GN=Ppp2r1a PE=1 SV=1	91584.6	91421.5	92269.1	119794	104654	86204.4	65007	79233.7	60437.2	62558.9	90144.7	75537.2
144	sp|Q63413|DX39B_RAT	Spliceosome RNA helicase Ddx39b OS=Rattus norvegicus OX=10116 GN=Ddx39b PE=2 SV=3	203379	174155	172218	160889	162324	159502	110436	156727	162400	155422	96099.1	147399
145	sp|P82995|HS90A_RAT	Heat shock protein HSP 90-alpha OS=Rattus norvegicus OX=10116 GN=Hsp90aa1 PE=1 SV=3	208965	204171	173103	215083	193573	179331	166556	224832	173187	144207	148357	141486
146	tr|Q5D059|Q5D059_RAT	Heterogeneous nuclear ribonucleoprotein K OS=Rattus norvegicus OX=10116 GN=Hnrnpk PE=1 SV=1	157383	155540	165779	193961	162060	143711	170342	168984	137609	134185	193584	150113
147	sp|P02091|HBB1_RAT	Hemoglobin subunit beta-1 OS=Rattus norvegicus OX=10116 GN=Hbb PE=1 SV=3	129198	357475	190086	474660	395152	196808	176957	160506	196686	195570	269120	214560
148	tr|M0R3X6|M0R3X6_RAT	Carbonyl reductase [NADPH] 1-like OS=Rattus norvegicus OX=10116 GN=LOC102556347 PE=1 SV=1	7905.17	9409.46	6374.83	10568.8	3310.91	5793.14	5474.07	38492.4	43753.7	6958.56	5488.88	732.969
149	sp|Q4V8H8|EHD2_RAT	EH domain-containing protein 2 OS=Rattus norvegicus OX=10116 GN=Ehd2 PE=1 SV=1	165191	216300	194947	209159	279429	140920	73443.4	93217.5	134231	131353	177859	164163
150	sp|P00481|OTC_RAT	Ornithine carbamoyltransferase, mitochondrial OS=Rattus norvegicus OX=10116 GN=Otc PE=1 SV=1	268761	218105	273064	184726	137919	177866	132176	255651	204770	116985	126643	92595.7
151	sp|P47875|CSRP1_RAT	Cysteine and glycine-rich protein 1 OS=Rattus norvegicus OX=10116 GN=Csrp1 PE=1 SV=2	269456	291630	252012	148619	229572	250838	191432	197913	260105	323070	86304	226628
152	tr|G3V6H6|G3V6H6_RAT	Fatty acid binding protein 6, ileal (Gastrotropin) OS=Rattus norvegicus OX=10116 GN=Fabp6 PE=3 SV=1	5059.93	3.44493e+06	347229	105922	40752.9	227472	130607	86990.5	182160	143291	152412	38834.5
153	sp|P62909|RS3_RAT	40S ribosomal protein S3 OS=Rattus norvegicus OX=10116 GN=Rps3 PE=1 SV=1	370626	360766	265093	285557	229340	311629	213830	269818	280161	314760	128352	215851
154	sp|P63102|1433Z_RAT	14-3-3 protein zeta/delta OS=Rattus norvegicus OX=10116 GN=Ywhaz PE=1 SV=1	583992	546220	597340	562246	656675	576405	313849	351038	185536	288256	222454	185155
155	sp|Q9Z2L0|VDAC1_RAT	Voltage-dependent anion-selective channel protein 1 OS=Rattus norvegicus OX=10116 GN=Vdac1 PE=1 SV=4	269381	184490	204350	183066	123043	225549	109494	210443	138434	136688	79061.9	140331
156	sp|P41562|IDHC_RAT	Isocitrate dehydrogenase [NADP] cytoplasmic OS=Rattus norvegicus OX=10116 GN=Idh1 PE=1 SV=1	226836	258112	290097	194334	202395	222185	86596.4	167050	135428	77593.8	91281.1	84732.1
157	tr|F1M853|F1M853_RAT	Ribosome-binding protein 1 OS=Rattus norvegicus OX=10116 GN=Rrbp1 PE=1 SV=3	57904.4	103977	110396	136389	94596.5	94732.2	64098.9	68214.1	47161.7	54081.2	160968	44566.5
158	tr|F1LQS6|F1LQS6_RAT	Xanthine dehydrogenase OS=Rattus norvegicus OX=10116 GN=Xdh PE=1 SV=2	79626.3	95552.6	94260.5	42450.5	35286.4	103392	48936	63577.8	79290.3	46256.7	21506.5	45362.2
159	sp|P62963|PROF1_RAT	Profilin-1 OS=Rattus norvegicus OX=10116 GN=Pfn1 PE=1 SV=2	706511	799538	735004	1.13207e+06	918983	757204	583540	618300	614724	573385	619880	565766
160	tr|D3ZJH9|D3ZJH9_RAT	Malic enzyme OS=Rattus norvegicus OX=10116 GN=Me2 PE=1 SV=1	94130.4	82108.6	95265.9	86502.5	46234.8	71032.1	52018.9	80103.3	72419.2	50570.8	23933	31885.9
161	tr|A0A0H2UHR7|A0A0H2UHR7_RAT	Filamin-C OS=Rattus norvegicus OX=10116 GN=Flnc PE=1 SV=1	56453.3	43570.5	93020.7	36559.7	68442	51793.2	51814.8	47463.9	54943.3	75268.8	24855.5	76006.9
162	sp|P20059|HEMO_RAT	Hemopexin OS=Rattus norvegicus OX=10116 GN=Hpx PE=1 SV=3	98189.6	181793	165212	197918	150220	120189	127574	165631	140015	101776	276982	139881
163	sp|Q01129|PGS2_RAT	Decorin OS=Rattus norvegicus OX=10116 GN=Dcn PE=1 SV=1	277946	604446	193423	327253	653098	396596	258545	306437	232107	365497	513854	567915
164	sp|P11507|AT2A2_RAT	Sarcoplasmic/endoplasmic reticulum calcium ATPase 2 OS=Rattus norvegicus OX=10116 GN=Atp2a2 PE=1 SV=1	62825.1	80249.7	63009.1	47468.7	47191.3	61104.3	43931.9	65675.9	58288.5	46289.3	34563.8	32927.2
165	tr|G3V8L9|G3V8L9_RAT	Caveolae-associated protein 1 OS=Rattus norvegicus OX=10116 GN=Cavin1 PE=1 SV=1	196725	251880	273487	215445	366784	233380	178466	195818	217369	269808	223623	291086
166	sp|P62142|PP1B_RAT	Serine/threonine-protein phosphatase PP1-beta catalytic subunit OS=Rattus norvegicus OX=10116 GN=Ppp1cb PE=1 SV=3	46110.8	45442.4	51207.5	41951.3	47057.5	39426.7	40247.7	49936.7	48276.6	48032.8	20570.3	32212.6
167	sp|P38650|DYHC1_RAT	Cytoplasmic dynein 1 heavy chain 1 OS=Rattus norvegicus OX=10116 GN=Dync1h1 PE=1 SV=1	64526.4	47078	60747	52809.6	65264.7	60541.9	43650.3	50571.5	42316.9	49493.5	44376.2	41831.5
168	tr|F1LRV4|F1LRV4_RAT	Heat shock 70 kDa protein 4 OS=Rattus norvegicus OX=10116 GN=Hspa4 PE=1 SV=1	68806.1	69331.8	75883.6	58493.7	53345.1	65891.8	45982.5	45086.3	46120.2	37396	21147.5	49436.5
169	sp|P62804|H4_RAT	Histone H4 OS=Rattus norvegicus OX=10116 GN=H4c2 PE=1 SV=2	1.43887e+06	1.25058e+06	1.72592e+06	739944	883734	2.97325e+06	2.18694e+06	1.57361e+06	1.36336e+06	2.27769e+06	1.90248e+06	2.42372e+06
170	tr|F1LNF7|F1LNF7_RAT	Isocitrate dehydrogenase [NAD] subunit, mitochondrial OS=Rattus norvegicus OX=10116 GN=Idh3a PE=1 SV=2	109424	99964.1	114183	117382	101392	85675.2	78295.7	106569	89797.7	71459.8	106115	88976.9
171	tr|Q5XI77|Q5XI77_RAT	Annexin OS=Rattus norvegicus OX=10116 GN=Anxa11 PE=1 SV=1	97862.3	90477	86771	87037.9	80285.1	82921.1	60401.1	81055.5	67659.5	66997.9	66410.9	64943.5
172	sp|P38983|RSSA_RAT	40S ribosomal protein SA OS=Rattus norvegicus OX=10116 GN=Rpsa PE=1 SV=3	288593	220781	218762	245116	211028	237048	177646	278782	210633	183604	266174	210950
173	sp|P09495|TPM4_RAT	Tropomyosin alpha-4 chain OS=Rattus norvegicus OX=10116 GN=Tpm4 PE=1 SV=3	25638.7	30808.9	27534.7	34122.3	35620.7	28925.7	40056.5	38878.5	29528.4	30515.1	49057	41315.5
174	sp|Q6AYD3|PA2G4_RAT	Proliferation-associated protein 2G4 OS=Rattus norvegicus OX=10116 GN=Pa2g4 PE=1 SV=1	92448.1	83375.6	82483.7	54225.3	54879.3	88226.3	80109.6	89463.3	55188.6	79523.9	25998.4	65619.3
175	tr|G3V741|G3V741_RAT	Phosphate carrier protein, mitochondrial OS=Rattus norvegicus OX=10116 GN=Slc25a3 PE=1 SV=1	252183	262769	169862	165769	136718	163896	149110	188279	166812	197830	57642.6	128136
176	tr|D3ZIA7|D3ZIA7_RAT	Anterior gradient 2 (Xenopus laevis) (Predicted), isoform CRA_a OS=Rattus norvegicus OX=10116 GN=Agr2 PE=4 SV=1	1.48469e+06	892219	1.14715e+06	1.45069e+06	604847	731377	1.01651e+06	1.19813e+06	1.14407e+06	961072	888023	426347
177	sp|P07150|ANXA1_RAT	Annexin A1 OS=Rattus norvegicus OX=10116 GN=Anxa1 PE=1 SV=2	73357.3	87401	91543.3	68774.2	134430	111274	60533.9	68028.4	67194.2	86994.7	79970.4	80001.2
178	sp|Q68FU3|ETFB_RAT	Electron transfer flavoprotein subunit beta OS=Rattus norvegicus OX=10116 GN=Etfb PE=1 SV=3	136106	106898	111694	104162	78732.9	94823.3	88607.6	122741	105622	89514.9	66783.3	66829
179	sp|P19945|RLA0_RAT	60S acidic ribosomal protein P0 OS=Rattus norvegicus OX=10116 GN=Rplp0 PE=1 SV=2	213958	214383	182559	249031	206078	153588	162044	243245	219139	171926	277123	159355
180	tr|Q66HT1|Q66HT1_RAT	Fructose-bisphosphate aldolase OS=Rattus norvegicus OX=10116 GN=Aldob PE=1 SV=1	177190	96559.8	280176	125884	76710.1	151677	165678	210463	139754	85970.7	81183.3	43094.8
181	sp|O88989|MDHC_RAT	Malate dehydrogenase, cytoplasmic OS=Rattus norvegicus OX=10116 GN=Mdh1 PE=1 SV=3	293982	357422	343005	309696	332679	304943	297101	328748	255058	225354	257421	280629
182	sp|Q4G075|ILEUA_RAT	Leukocyte elastase inhibitor A OS=Rattus norvegicus OX=10116 GN=Serpinb1a PE=1 SV=1	194107	169866	222009	146261	98533.8	166415	75546.5	123883	132868	89450.2	36568.6	73373.8
183	tr|A0A0G2JSS8|A0A0G2JSS8_RAT	Peroxiredoxin-5 OS=Rattus norvegicus OX=10116 GN=Prdx5 PE=1 SV=1	241116	181395	177445	212836	152274	190652	102863	146535	146013	92765.8	116413	105204
184	sp|P85973|PNPH_RAT	Purine nucleoside phosphorylase OS=Rattus norvegicus OX=10116 GN=Pnp PE=1 SV=1	103142	94245.9	94126	100882	84355.6	109619	87047.1	97100.3	97231.2	61471.4	74149.4	79927.6
185	sp|Q68FQ0|TCPE_RAT	T-complex protein 1 subunit epsilon OS=Rattus norvegicus OX=10116 GN=Cct5 PE=1 SV=1	82024.3	83583.9	75265	55458.8	74281	100926	61359.8	62509.6	76319.4	64383.6	52252	81278.4
186	sp|P0DMW1|HS71B_RAT	Heat shock 70 kDa protein 1B OS=Rattus norvegicus OX=10116 GN=Hspa1b PE=2 SV=1	131294	134167	151971	95265.7	132185	154944	100457	107745	135349	127649	69243.6	128873
187	sp|Q7M0E3|DEST_RAT	Destrin OS=Rattus norvegicus OX=10116 GN=Dstn PE=1 SV=3	365612	330281	351303	183132	140932	245934	288894	353450	331809	258684	100080	258256
188	tr|D4AC23|D4AC23_RAT	T-complex protein 1 subunit eta OS=Rattus norvegicus OX=10116 GN=Cct7 PE=1 SV=1	70696.8	79131.6	83410.1	59047.7	87067.7	87564.4	48737.8	63708.7	80258.9	52437	51643.2	63191.6
189	sp|Q9Z144|LEG2_RAT	Galectin-2 OS=Rattus norvegicus OX=10116 GN=Lgals2 PE=2 SV=1	1.81785e+06	1.19993e+06	1.58265e+06	1.44658e+06	605163	1.16778e+06	1.34609e+06	1.64047e+06	1.40891e+06	1.11859e+06	1.03198e+06	967661
190	tr|B0BMT9|B0BMT9_RAT	Sqrdl protein OS=Rattus norvegicus OX=10116 GN=Sqor PE=1 SV=1	211990	119182	185361	141012	65582	107428	100525	180160	110982	103905	42428.8	90174.2
191	sp|P45592|COF1_RAT	Cofilin-1 OS=Rattus norvegicus OX=10116 GN=Cfl1 PE=1 SV=3	188269	151154	173949	126592	126892	184892	144626	151657	128530	134810	67247.1	159471
192	sp|P63245|RACK1_RAT	Receptor of activated protein C kinase 1 OS=Rattus norvegicus OX=10116 GN=Rack1 PE=1 SV=3	77085.6	138957	104878	64405.4	90464.6	192296	107753	68408.7	106028	129113	38950.8	53047.6
193	tr|F1M3D3|F1M3D3_RAT	Heterogeneous nuclear ribonucleoprotein M OS=Rattus norvegicus OX=10116 GN=Hnrnpm PE=1 SV=1	115096	67086.1	41837.2	99166	83512.2	43202	61929.5	56326.5	47811.6	47538.1	62305.3	69074.9
194	sp|P15650|ACADL_RAT	Long-chain specific acyl-CoA dehydrogenase, mitochondrial OS=Rattus norvegicus OX=10116 GN=Acadl PE=1 SV=1	145983	119914	165379	122067	131423	91728.3	99376.1	145031	125329	119711	100523	103920
195	sp|P0DP31|CALM3_RAT	Calmodulin-3 OS=Rattus norvegicus OX=10116 GN=Calm3 PE=1 SV=1	142417	138253	226556	99343.1	157596	183474	212275	173734	186958	216127	249472	190859
196	sp|O35244|PRDX6_RAT	Peroxiredoxin-6 OS=Rattus norvegicus OX=10116 GN=Prdx6 PE=1 SV=3	102747	113938	66734.2	116467	107216	72391.8	83694.9	100176	71735.6	60003.6	97551.7	66868.6
197	sp|Q5RKI0|WDR1_RAT	WD repeat-containing protein 1 OS=Rattus norvegicus OX=10116 GN=Wdr1 PE=1 SV=3	301373	302295	291387	195981	192564	271062	245614	315524	296183	265525	89414.3	183660
198	sp|P04906|GSTP1_RAT	Glutathione S-transferase P OS=Rattus norvegicus OX=10116 GN=Gstp1 PE=1 SV=2	402055	395879	363689	493341	372312	303239	272201	418292	344752	280648	420550	234805
199	sp|P50398|GDIA_RAT	Rab GDP dissociation inhibitor alpha OS=Rattus norvegicus OX=10116 GN=Gdi1 PE=1 SV=1	49049.1	125558	57547.4	44555.7	57563.4	99888.9	33980.5	31234	36024.1	30904.9	18269.3	42237
200	sp|Q9EQS0|TALDO_RAT	Transaldolase OS=Rattus norvegicus OX=10116 GN=Taldo1 PE=1 SV=2	142671	141495	156851	166206	135249	132100	144171	200688	163492	111307	161048	107680
201	sp|P85968|6PGD_RAT	6-phosphogluconate dehydrogenase, decarboxylating OS=Rattus norvegicus OX=10116 GN=Pgd PE=1 SV=1	159046	145641	133468	161973	112450	106278	96520.5	135689	125872	92238.4	86370.7	59949.4
202	sp|A7VJC2|ROA2_RAT	Heterogeneous nuclear ribonucleoproteins A2/B1 OS=Rattus norvegicus OX=10116 GN=Hnrnpa2b1 PE=1 SV=1	380970	344441	310468	383402	382978	283653	301874	327328	319303	290363	213629	276603
203	tr|A0A0G2JTI8|A0A0G2JTI8_RAT	Aminopeptidase OS=Rattus norvegicus OX=10116 GN=Enpep PE=1 SV=1	113853	58431.2	124118	64885.9	20055.3	50190.2	48876.1	120493	88543.4	44244.3	19840.5	20852.6
204	tr|Q6P9U0|Q6P9U0_RAT	Serine (Or cysteine) peptidase inhibitor, clade B, member 6a OS=Rattus norvegicus OX=10116 GN=Serpinb6a PE=1 SV=1	174348	132724	156276	95894.8	85726.8	121619	70775.1	98395.3	135639	94559.2	39943.8	81721.4
205	tr|A0A0G2JVH4|A0A0G2JVH4_RAT	MICOS complex subunit MIC60 OS=Rattus norvegicus OX=10116 GN=Immt PE=1 SV=1	62656.5	52656.7	41976.5	65674	58818.2	43119.9	47761.8	58794	45114	46229.3	64219.5	54275.9
206	sp|P18418|CALR_RAT	Calreticulin OS=Rattus norvegicus OX=10116 GN=Calr PE=1 SV=1	349877	327292	326124	308085	244558	315918	304387	345152	347672	311733	115256	258034
207	sp|P47853|PGS1_RAT	Biglycan OS=Rattus norvegicus OX=10116 GN=Bgn PE=1 SV=1	72827.1	126685	122311	136796	195896	142947	94911	74279	139995	105837	177168	161108
208	sp|Q06647|ATPO_RAT	ATP synthase subunit O, mitochondrial OS=Rattus norvegicus OX=10116 GN=Atp5po PE=1 SV=1	256865	302834	321992	252829	252213	229754	183283	354751	239524	264210	248833	280055
209	tr|D3ZVB7|D3ZVB7_RAT	Mimecan OS=Rattus norvegicus OX=10116 GN=Ogn PE=1 SV=1	185215	378600	328960	247511	574289	275984	206258	193874	284447	322902	284514	358900
210	tr|M0R6L4|M0R6L4_RAT	40S ribosomal protein S3a OS=Rattus norvegicus OX=10116 GN=LOC100365839 PE=3 SV=1	154916	137836	183765	138893	149975	184073	147232	170289	142807	126270	160630	129119
211	sp|P67779|PHB_RAT	Prohibitin OS=Rattus norvegicus OX=10116 GN=Phb PE=1 SV=1	71663.5	75361.9	79110.7	73409.7	67565.1	183308	88785.4	146276	90832.4	94110.8	76535.5	175896
212	sp|P81155|VDAC2_RAT	Voltage-dependent anion-selective channel protein 2 OS=Rattus norvegicus OX=10116 GN=Vdac2 PE=1 SV=2	191188	182149	117381	124994	114366	87539.3	162201	178349	187874	208497	57863.9	152979
213	tr|A0A0G2JWZ2|A0A0G2JWZ2_RAT	Amine oxidase OS=Rattus norvegicus OX=10116 PE=3 SV=1	62376.8	140117	91274.8	60834.6	134519	102604	95415	74404.2	79007	103293	51272.2	50027.8
214	tr|Q5XIH1|Q5XIH1_RAT	Asporin OS=Rattus norvegicus OX=10116 GN=Aspn PE=1 SV=1	121862	269140	240758	135990	379051	241373	78229.1	87708.7	202938	251078	123282	265021
215	sp|P35565|CALX_RAT	Calnexin OS=Rattus norvegicus OX=10116 GN=Canx PE=1 SV=1	65245.8	77138.7	44092.6	75206.7	89661.7	66517.6	44393.6	55871.1	54918.6	78064	43394.1	48591.9
216	sp|Q5XFX0|TAGL2_RAT	Transgelin-2 OS=Rattus norvegicus OX=10116 GN=Tagln2 PE=1 SV=1	401141	496222	363862	438974	494419	338473	232839	229259	240749	268008	335819	449765
217	sp|Q63610|TPM3_RAT	Tropomyosin alpha-3 chain OS=Rattus norvegicus OX=10116 GN=Tpm3 PE=1 SV=2	86943.4	75754	60103.4	107724	79614	71877.9	68984	77326.3	66018.4	57419	109294	58744.9
218	tr|D3ZLY9|D3ZLY9_RAT	Histone H2B OS=Rattus norvegicus OX=10116 GN=Hist1h2bh PE=3 SV=2	3.51325e+07	3.23511e+07	3.38683e+07	4.26758e+07	4.15615e+07	4.60096e+07	5.56453e+07	4.57706e+07	4.93819e+07	4.94056e+07	6.18488e+07	6.08281e+07
219	sp|P13803|ETFA_RAT	Electron transfer flavoprotein subunit alpha, mitochondrial OS=Rattus norvegicus OX=10116 GN=Etfa PE=1 SV=4	145998	113871	148297	138408	90825.8	100731	48998.2	64533.6	67835.5	50586.7	54606.3	72749.3
220	tr|B0K031|B0K031_RAT	60S ribosomal protein L7 OS=Rattus norvegicus OX=10116 GN=Rpl7 PE=1 SV=1	155717	142630	151527	108792	74126.9	128678	135464	180166	166442	127620	51257.5	109046
221	sp|Q5I0D7|PEPD_RAT	Xaa-Pro dipeptidase OS=Rattus norvegicus OX=10116 GN=Pepd PE=2 SV=1	149085	97077.2	144022	62158.7	35515.8	83697.5	73502	117751	113295	65558.9	17373.4	34199.8
222	tr|Q6PDW1|Q6PDW1_RAT	40S ribosomal protein S12 OS=Rattus norvegicus OX=10116 GN=Rps12 PE=1 SV=1	170180	165902	132432	165574	174390	157879	148928	170460	161429	142340	192220	124053
223	sp|P68255|1433T_RAT	14-3-3 protein theta OS=Rattus norvegicus OX=10116 GN=Ywhaq PE=1 SV=1	163399	151558	90219.6	221329	214344	75558.7	62307.8	78840.8	56465.9	51615.2	71873.1	65406.1
224	tr|X1WI37|X1WI37_RAT	40S ribosomal protein S4 OS=Rattus norvegicus OX=10116 GN=Rps4x PE=3 SV=1	179319	163701	157366	135015	115312	150351	127583	187840	133647	131130	69671.5	121223
225	sp|Q6AYT3|RTCB_RAT	RNA-splicing ligase RtcB homolog OS=Rattus norvegicus OX=10116 GN=Rtcb PE=2 SV=1	57390.3	45333.7	49156.4	49618.4	39837.8	34071.4	26564.8	38908.9	38074.7	34337.3	42544.3	32430.9
226	tr|G3V9U2|G3V9U2_RAT	3-ketoacyl-CoA thiolase, mitochondrial OS=Rattus norvegicus OX=10116 GN=Acaa2 PE=1 SV=3	56927	66474	75481.1	60656.4	69333.7	66348.6	52394.5	58591.2	52249.4	56653.6	37287.3	54453.3
227	tr|Q6PCU0|Q6PCU0_RAT	ATP synthase subunit gamma OS=Rattus norvegicus OX=10116 GN=Atp5f1c PE=1 SV=1	148697	121516	148186	146002	69519.5	125334	76980.1	97768.9	93739.9	85505.8	60085.3	133026
228	tr|A0A0G2K8K0|A0A0G2K8K0_RAT	Splicing factor proline and glutamine-rich OS=Rattus norvegicus OX=10116 GN=Sfpq PE=1 SV=1	47677.3	49945.1	53147.8	62028.2	57243.1	53545.4	22872.4	6059.91	16278.4	23577.2	17236.5	45326.5
229	tr|Q6P736|Q6P736_RAT	Polypyrimidine tract-binding protein 1 OS=Rattus norvegicus OX=10116 GN=Ptbp1 PE=1 SV=1	57817.1	52846.7	52935.5	61234	46564.9	58918.8	32793.2	24998.3	33971.2	34455.7	41486.2	32469.9
230	sp|Q63041|A1M_RAT	Alpha-1-macroglobulin OS=Rattus norvegicus OX=10116 GN=A1m PE=1 SV=1	106182	153768	102135	118964	99837.9	74656.8	83589.7	94070.7	109168	64155.2	51953	82247.2
231	tr|A0A0G2JYB1|A0A0G2JYB1_RAT	F-actin-capping protein subunit beta OS=Rattus norvegicus OX=10116 GN=Capzb PE=1 SV=1	113464	140682	153404	100651	87215.7	118088	105933	141752	125437	98420.7	81701.9	129971
232	sp|Q08290|CNN1_RAT	Calponin-1 OS=Rattus norvegicus OX=10116 GN=Cnn1 PE=1 SV=1	669960	682087	606630	796368	1.33333e+06	295618	645019	515765	771692	685933	981041	877685
233	tr|A0A0G2K654|A0A0G2K654_RAT	H1.2 linker histone, cluster member OS=Rattus norvegicus OX=10116 GN=Hist1h1c PE=1 SV=1	94331.4	65907.9	302682	79540.4	98725.2	330930	342372	163904	129457	339939	361886	254606
234	tr|F1M013|F1M013_RAT	60S ribosomal protein L7a OS=Rattus norvegicus OX=10116 GN=Rpl7a PE=3 SV=2	169820	125304	78358.7	122587	85979.8	134824	148853	131460	54796.5	128843	82349.6	50985
235	sp|P19804|NDKB_RAT	Nucleoside diphosphate kinase B OS=Rattus norvegicus OX=10116 GN=Nme2 PE=1 SV=1	12110	24579.8	6575.91	31179.5	23345.3	9730.84	4171.73	5131.96	5176.93	2378.66	13411.6	4326.01
236	tr|D3ZCR3|D3ZCR3_RAT	High mobility group protein B1 pseudogene OS=Rattus norvegicus OX=10116 GN=LOC108349189 PE=3 SV=2	70987.3	64203.1	70348.9	91966.8	99065.3	73197.2	116384	91146.9	69080.8	101851	157036	97510.9
237	tr|B0BNJ1|B0BNJ1_RAT	LOC683667 protein OS=Rattus norvegicus OX=10116 GN=Sri PE=1 SV=1	183342	162008	182645	171146	177460	155179	167902	199592	183565	161602	188585	176381
238	tr|G3V6S2|G3V6S2_RAT	Citrate hydro-lyase OS=Rattus norvegicus OX=10116 GN=Aco1 PE=1 SV=1	60141.7	67213.5	52015.3	40929.6	29848.9	45546.5	27149.9	37444.7	36002.4	27570.9	10827.8	17929.8
239	sp|Q66X93|SND1_RAT	Staphylococcal nuclease domain-containing protein 1 OS=Rattus norvegicus OX=10116 GN=Snd1 PE=1 SV=1	37600.5	57013	51201.1	44927.2	43416	63409.7	31389.6	42816.8	45536.7	43068.1	17591.8	32697
240	tr|Q5RJR9|Q5RJR9_RAT	Collagen-binding protein OS=Rattus norvegicus OX=10116 GN=Serpinh1 PE=1 SV=1	77284.1	83732	66696.3	76968.6	82159.2	69599.8	68283.9	88377.8	65285	100787	59932.9	90114.5
241	tr|A0A0U1RVI9|A0A0U1RVI9_RAT	40S ribosomal protein S2 OS=Rattus norvegicus OX=10116 GN=rCG_34378 PE=3 SV=1	101187	103936	95363.2	86043.5	86368.5	110550	78772.9	116634	82382.5	79054.1	51057.3	76993.7
242	tr|A0A0G2K890|A0A0G2K890_RAT	Ezrin OS=Rattus norvegicus OX=10116 GN=Ezr PE=1 SV=1	142425	65056.3	122847	66972.3	44975.6	74584.5	91907.8	111269	66494.9	53128.7	60985.6	50569.7
243	sp|Q68FR6|EF1G_RAT	Elongation factor 1-gamma OS=Rattus norvegicus OX=10116 GN=Eef1g PE=2 SV=3	100006	95307.5	95903.7	154756	82364	98990.9	92068	127746	69906.3	81915.2	74770.6	84787.2
244	tr|Q5BJZ3|Q5BJZ3_RAT	Proton-translocating NAD(P)(+) transhydrogenase OS=Rattus norvegicus OX=10116 GN=Nnt PE=1 SV=1	99213.7	84726.2	106873	60792.7	71906.2	78515.4	80156.3	77086	90588.4	110140	28497.6	88853.1
245	sp|P07943|ALDR_RAT	Aldo-keto reductase family 1 member B1 OS=Rattus norvegicus OX=10116 GN=Akr1b1 PE=1 SV=3	101388	88721.6	84376.2	80086.5	69063	85429.9	83075.9	103746	86055.5	61576.7	36617.3	72514.8
246	sp|P29314|RS9_RAT	40S ribosomal protein S9 OS=Rattus norvegicus OX=10116 GN=Rps9 PE=1 SV=4	175848	178756	137350	129377	112010	153617	97935.3	111057	97778.7	103619	37659.5	106041
247	tr|M0R5K9|M0R5K9_RAT	40S ribosomal protein S18 OS=Rattus norvegicus OX=10116 PE=3 SV=1	110189	95369.4	97871.7	119903	94737.1	102609	105581	127735	116897	84929.7	132570	96779.1
248	tr|Q6TXG7|Q6TXG7_RAT	Serine hydroxymethyltransferase OS=Rattus norvegicus OX=10116 GN=Shmt1 PE=1 SV=1	35608.1	41302	36992.1	42602.9	28139.1	33731.1	19416.8	24803.8	30729.6	24471.8	22050.8	22901.9
249	sp|P04897|GNAI2_RAT	Guanine nucleotide-binding protein G(i) subunit alpha-2 OS=Rattus norvegicus OX=10116 GN=Gnai2 PE=1 SV=3	59282.4	68782.8	54780.4	46658.6	66395.7	80556.5	61642.5	63347.5	71425.6	76983.9	33899.7	56107.5
250	sp|P24368|PPIB_RAT	Peptidyl-prolyl cis-trans isomerase B OS=Rattus norvegicus OX=10116 GN=Ppib PE=1 SV=3	138308	134965	144035	123790	133247	157472	133967	147105	164926	142183	92996.2	140861
251	tr|F1LQS3|F1LQS3_RAT	60S ribosomal protein L6 OS=Rattus norvegicus OX=10116 GN=Rpl6-ps1 PE=3 SV=1	103816	90883.3	100616	52206.8	48919.6	24845.1	56871.1	110049	69078.9	85224.3	33359	43992.5
252	sp|Q5M7U6|ARP2_RAT	Actin-related protein 2 OS=Rattus norvegicus OX=10116 GN=Actr2 PE=2 SV=1	224718	191484	174791	149585	129444	200885	179466	213403	190702	164182	66606.2	172331
253	tr|G3V936|G3V936_RAT	Citrate synthase OS=Rattus norvegicus OX=10116 GN=Cs PE=1 SV=1	154386	130714	131576	187445	188840	62118.3	146964	211936	142926	145998	134327	115317
254	tr|D3ZIE9|D3ZIE9_RAT	Delta-1-pyrroline-5-carboxylate synthase OS=Rattus norvegicus OX=10116 GN=Aldh18a1 PE=3 SV=1	50601.7	38130.6	42814.1	24582.1	16899.6	45462.4	35868.9	40736.5	29976.9	38894.2	11545	18940.1
255	sp|P05545|SPA3K_RAT	Serine protease inhibitor A3K OS=Rattus norvegicus OX=10116 GN=Serpina3k PE=1 SV=3	52387.8	62016.9	41443.6	94464.7	33217.6	24076.6	36811.2	43958.9	53734.7	27674.6	47336.4	20938.2
256	sp|P42123|LDHB_RAT	L-lactate dehydrogenase B chain OS=Rattus norvegicus OX=10116 GN=Ldhb PE=1 SV=2	58656	91562.7	53999.8	78840.6	83205	60707.6	40195.4	44654.8	44123.6	41331.2	35483	50025.5
257	tr|E9PU64|E9PU64_RAT	Adseverin OS=Rattus norvegicus OX=10116 GN=Scin PE=1 SV=1	76747.7	47275.1	60511.2	33017.1	20722.4	46202.3	39143.5	65339.1	56050.2	35277.3	10708.1	18541.5
258	sp|P25113|PGAM1_RAT	Phosphoglycerate mutase 1 OS=Rattus norvegicus OX=10116 GN=Pgam1 PE=1 SV=4	117987	115381	109702	134635	138039	124795	100017	130239	111395	84670.3	129309	80269.6
259	sp|P08010|GSTM2_RAT	Glutathione S-transferase Mu 2 OS=Rattus norvegicus OX=10116 GN=Gstm2 PE=1 SV=2	82441.1	88356.9	47652.8	65555.4	86033.9	48900	39602.2	39313.9	34192.8	35421.1	20994.8	38475.3
260	tr|A0A0G2JZ73|A0A0G2JZ73_RAT	Alpha-1-antiproteinase OS=Rattus norvegicus OX=10116 GN=Serpina1 PE=1 SV=1	80125	112703	114064	90843.9	71723.7	63968.7	80641.4	112416	103050	72559.1	46593.9	73304.7
261	sp|Q60587|ECHB_RAT	Trifunctional enzyme subunit beta, mitochondrial OS=Rattus norvegicus OX=10116 GN=Hadhb PE=1 SV=1	84094.3	78825.2	68555.9	61336.9	48081.9	88759.2	72229.6	88533.9	90798.7	82848.9	33923.5	70730.4
262	tr|Q4V8H5|Q4V8H5_RAT	Aspartyl aminopeptidase OS=Rattus norvegicus OX=10116 GN=Dnpep PE=1 SV=1	71183.1	62449.9	68876	68062.9	44767.4	48481.8	40659.7	66322.7	60507.5	41780.6	18859.9	29088.5
263	tr|D3ZQN7|D3ZQN7_RAT	Laminin subunit beta 1 OS=Rattus norvegicus OX=10116 GN=Lamb1 PE=1 SV=3	32555.2	51815.6	46414.9	28502.7	50663.1	45383.4	25605.3	22954.4	26727.8	29001.1	10523.2	33886.6
264	sp|O35814|STIP1_RAT	Stress-induced-phosphoprotein 1 OS=Rattus norvegicus OX=10116 GN=Stip1 PE=1 SV=1	72540.3	70710.7	76129.8	84303.6	65653.6	68604.1	75784.9	88726.8	72645.9	61312.5	102438	59051.3
265	tr|A0A0G2JZS2|A0A0G2JZS2_RAT	Polyadenylate-binding protein 1 OS=Rattus norvegicus OX=10116 GN=Pabpc1 PE=1 SV=1	83219.3	83776.9	74409.6	61984.2	88460.4	78658.5	72806.6	74529.5	69354.3	69118.7	34192.5	71455.5
266	tr|A0A0G2K930|A0A0G2K930_RAT	Ras-related protein Rab-7a OS=Rattus norvegicus OX=10116 GN=Rab7a PE=1 SV=1	92333	84830.8	87115.8	66175.5	68954.6	99276.8	81278.2	89492.7	78238.1	70915.3	44972.7	77687.6
267	sp|Q641Y0|OST48_RAT	Dolichyl-diphosphooligosaccharide--protein glycosyltransferase 48 kDa subunit OS=Rattus norvegicus OX=10116 GN=Ddost PE=2 SV=1	116968	133484	119695	81283.3	34123.7	146756	96027.6	115316	120215	135920	50663.2	100487
268	tr|M0R735|M0R735_RAT	Heterogeneous nuclear ribonucleoprotein Q OS=Rattus norvegicus OX=10116 GN=Syncrip PE=1 SV=2	53422.4	65882.1	38695.9	62723.2	74403.4	55020.6	53939.6	42202.8	41017.3	53247.6	56541.2	53659.7
269	sp|P11762|LEG1_RAT	Galectin-1 OS=Rattus norvegicus OX=10116 GN=Lgals1 PE=1 SV=2	150707	215140	220794	175425	271916	167104	154744	155616	161120	191503	174090	206911
270	tr|Q3MHS9|Q3MHS9_RAT	Chaperonin containing Tcp1, subunit 6A (Zeta 1) OS=Rattus norvegicus OX=10116 GN=Cct6a PE=1 SV=1	87305.4	78659.7	96596.3	76373.9	78282.4	83421	53331.8	99551	81811.5	63431.2	61821.2	49932.7
271	sp|P61983|1433G_RAT	14-3-3 protein gamma OS=Rattus norvegicus OX=10116 GN=Ywhag PE=1 SV=2	35633.7	35868	35807.6	43171.1	49055.5	36155.5	12677.5	15155.1	15639.3	14005.8	17824.2	18861.7
272	sp|P02680|FIBG_RAT	Fibrinogen gamma chain OS=Rattus norvegicus OX=10116 GN=Fgg PE=1 SV=3	33567.5	77689.1	57937.4	66514.5	91781	71560.3	38397	53714.3	62006.3	44993.3	71837.4	42250.8
273	sp|P85834|EFTU_RAT	Elongation factor Tu, mitochondrial OS=Rattus norvegicus OX=10116 GN=Tufm PE=1 SV=1	68073.2	55990.7	82907.7	59772	49917.3	62658.8	52667.8	72912.3	58980.8	52381.1	54346.4	46745.3
274	sp|Q794E4|HNRPF_RAT	Heterogeneous nuclear ribonucleoprotein F OS=Rattus norvegicus OX=10116 GN=Hnrnpf PE=1 SV=3	54940	54157.7	67026.7	68503.3	63747.1	64021	11739.6	17087.2	20043.7	13196.4	29048.3	46564
275	tr|Q6P9Y4|Q6P9Y4_RAT	ADP/ATP translocase 1 OS=Rattus norvegicus OX=10116 GN=Slc25a4 PE=1 SV=1	78805.8	123505	118937	51093.5	103989	69094.7	83467.3	80474.2	92863.7	129922	32122.2	87475.7
276	sp|Q3MIE4|VAT1_RAT	Synaptic vesicle membrane protein VAT-1 homolog OS=Rattus norvegicus OX=10116 GN=Vat1 PE=1 SV=1	104914	145795	151198	91308.1	144920	132319	95250.7	98974.9	112425	128632	85327.3	115732
277	tr|A0A0G2JSG6|A0A0G2JSG6_RAT	Adenylate kinase 2, mitochondrial OS=Rattus norvegicus OX=10116 GN=Ak2 PE=1 SV=1	80076.1	61946.3	82433.7	84199.3	59178.9	68743.6	77484	86232.5	75036.5	58014.3	91820.9	53333.5
278	tr|G3V8L1|G3V8L1_RAT	PYD and CARD domain-containing OS=Rattus norvegicus OX=10116 GN=Pycard PE=1 SV=1	148159	152638	102805	153744	98331.8	97559.6	28342.3	49937.2	101841	59965.6	126595	79499.6
279	sp|P31399|ATP5H_RAT	ATP synthase subunit d, mitochondrial OS=Rattus norvegicus OX=10116 GN=Atp5pd PE=1 SV=3	132989	149800	153564	145827	151734	123202	142217	149799	140125	162882	189160	150267
280	sp|O35567|PUR9_RAT	Bifunctional purine biosynthesis protein ATIC OS=Rattus norvegicus OX=10116 GN=Atic PE=1 SV=2	52450.9	51484.7	39523.9	54539	42944.3	34777.8	45905	52187.2	39199	39689.5	44745.2	37284.2
281	tr|D3ZXP3|D3ZXP3_RAT	Histone H2A OS=Rattus norvegicus OX=10116 GN=H2afx PE=1 SV=1	586707	139864	188671	270930	242376	153023	155330	156815	130825	100506	230695	366059
282	sp|Q6PDV7|RL10_RAT	60S ribosomal protein L10 OS=Rattus norvegicus OX=10116 GN=Rpl10 PE=1 SV=3	66601.6	65290.6	59740.8	73990.2	54423	50161.3	52220.9	69694.9	60216.6	41211.1	47884.7	36832.7
283	sp|P62907|RL10A_RAT	60S ribosomal protein L10a OS=Rattus norvegicus OX=10116 GN=Rpl10a PE=1 SV=2	193216	175072	183061	167113	170487	178474	165183	198216	165909	171564	141369	112912
284	tr|A0A0G2JUL7|A0A0G2JUL7_RAT	Septin 6 (Predicted), isoform CRA_b OS=Rattus norvegicus OX=10116 GN=Sept11 PE=1 SV=1	35536.5	46499.2	39938.9	34132.6	39793.9	50979.7	32409	35914.8	37787.8	40756.4	16095.4	38062.6
285	tr|D3ZZC1|D3ZZC1_RAT	RCG43947 OS=Rattus norvegicus OX=10116 GN=Txndc5 PE=1 SV=1	85913.6	95538.5	92167.1	81938.6	83997.4	113202	56519.3	77402.4	80228	70209.5	28761.6	60825.6
286	sp|Q5XI73|GDIR1_RAT	Rho GDP-dissociation inhibitor 1 OS=Rattus norvegicus OX=10116 GN=Arhgdia PE=1 SV=1	182226	146869	135530	148925	117907	155929	141726	149587	137372	122530	78534	122267
287	tr|A0A0G2K9H8|A0A0G2K9H8_RAT	ADP-ribosylation factor 3 OS=Rattus norvegicus OX=10116 GN=Arf3 PE=3 SV=1	142999	136726	118347	104434	68426.7	126673	124755	127502	140990	105416	48495.5	88050.9
288	tr|A0A0G2KAM3|A0A0G2KAM3_RAT	Pyruvate dehydrogenase E1 component subunit beta OS=Rattus norvegicus OX=10116 GN=Pdhb PE=1 SV=1	75119.9	82746	88962.7	47354.6	63564.3	76201.1	46283.5	50996.5	68251	75222.7	28445.3	76071.8
289	sp|P28480|TCPA_RAT	T-complex protein 1 subunit alpha OS=Rattus norvegicus OX=10116 GN=Tcp1 PE=1 SV=1	75213.3	75872.9	76852.9	58634.7	86536	89803	56453.2	72042.6	75065.4	65211.9	30425.6	53797.4
290	tr|F2Z3Q8|F2Z3Q8_RAT	Importin subunit beta-1 OS=Rattus norvegicus OX=10116 GN=Kpnb1 PE=1 SV=1	34431.8	52518.8	43285.4	65061.9	51295.6	44072.2	27239.2	35149.6	26346	30719.9	40704.7	36527.7
291	sp|Q3T1J1|IF5A1_RAT	Eukaryotic translation initiation factor 5A-1 OS=Rattus norvegicus OX=10116 GN=Eif5a PE=1 SV=3	96798.4	90651.8	74418.2	114377	82945.3	85847.6	59012.1	74101.5	84811	79152.6	96181.1	76351
292	tr|D3ZZZ9|D3ZZZ9_RAT	Catenin (Cadherin associated protein), delta 1 (Predicted), isoform CRA_a OS=Rattus norvegicus OX=10116 GN=Ctnnd1 PE=1 SV=1	83706	52327.4	64714.1	72105.2	42276	49891.7	10658.1	10845.3	37955.6	37049.4	43497.4	43117.4
293	sp|Q8CFN2|CDC42_RAT	Cell division control protein 42 homolog OS=Rattus norvegicus OX=10116 GN=Cdc42 PE=1 SV=2	65489.3	62790	61671.5	60252	47209.7	50064.4	47375.5	47509.4	50626.6	32301.3	27222.4	29394.8
294	tr|Q5M7T5|Q5M7T5_RAT	Antithrombin-III OS=Rattus norvegicus OX=10116 GN=Serpinc1 PE=1 SV=1	62804.5	64380.7	75492.5	102797	62847	58567.6	58785.5	58997.3	72357	53507.4	80989.8	43973.1
295	sp|P62828|RAN_RAT	GTP-binding nuclear protein Ran OS=Rattus norvegicus OX=10116 GN=Ran PE=1 SV=3	119452	120357	118267	86862.1	92700.6	118594	127823	136089	122335	125000	56449.8	100731
296	sp|Q63355|MYO1C_RAT	Unconventional myosin-Ic OS=Rattus norvegicus OX=10116 GN=Myo1c PE=1 SV=2	37759.4	67586.9	67675.9	27868.1	64115	78137.6	12010.6	61482.4	47258.5	52189.6	17020.5	46971.7
297	sp|Q68FS4|AMPL_RAT	Cytosol aminopeptidase OS=Rattus norvegicus OX=10116 GN=Lap3 PE=1 SV=1	59679	47997.5	67793	79203.2	40374.2	45146.8	37293.2	63417.1	28164.4	35307.1	32398.6	32594.5
298	sp|P62243|RS8_RAT	40S ribosomal protein S8 OS=Rattus norvegicus OX=10116 GN=Rps8 PE=1 SV=2	107268	89459.3	78910	69680.5	53650.5	105017	75226.7	87263.5	86459.1	73711.9	26738.5	111165
299	tr|D3ZJ08|D3ZJ08_RAT	Histone H3 OS=Rattus norvegicus OX=10116 GN=Hist2h3c2 PE=1 SV=1	855.636	230.828	184.42	183.14	0	0	0	165.577	0	52.6503	458.095	0
300	sp|P21913|SDHB_RAT	Succinate dehydrogenase [ubiquinone] iron-sulfur subunit, mitochondrial OS=Rattus norvegicus OX=10116 GN=Sdhb PE=2 SV=2	82767.9	82984.5	62577.5	95831.5	26621.5	71115.9	29718.7	34190.6	22137.8	49743.8	67009.2	27461.9
301	sp|O70351|HCD2_RAT	3-hydroxyacyl-CoA dehydrogenase type-2 OS=Rattus norvegicus OX=10116 GN=Hsd17b10 PE=1 SV=3	77928.6	59278.3	75659.5	60695.2	58229.1	66509	40742.1	45278.3	51221.1	50774.6	44811.2	44693.4
302	tr|A0A0G2JSJ2|A0A0G2JSJ2_RAT	UMP-CMP kinase OS=Rattus norvegicus OX=10116 GN=Cmpk1 PE=1 SV=1	64169.3	45973.7	47991.2	55863.8	33321.2	46632.4	41432.1	55557.8	44266.4	38924	23191	36427.1
303	tr|A0A0G2JT93|A0A0G2JT93_RAT	Catenin (Cadherin associated protein), beta 1, isoform CRA_a OS=Rattus norvegicus OX=10116 GN=Ctnnb1 PE=1 SV=1	31242.2	23391.2	30713	26739.5	16031.3	27647.4	21860.5	27009.3	25948.2	21315.2	14982.4	16441.5
304	sp|B2GUZ5|CAZA1_RAT	F-actin-capping protein subunit alpha-1 OS=Rattus norvegicus OX=10116 GN=Capza1 PE=1 SV=1	55145.3	47511.5	53362.4	52125.2	43814.3	47493.4	17150.1	17210.6	45266.3	45344.2	41434.6	45905.5
305	sp|P07632|SODC_RAT	Superoxide dismutase [Cu-Zn] OS=Rattus norvegicus OX=10116 GN=Sod1 PE=1 SV=2	341025	330970	348433	403556	362525	334103	145765	456360	420407	332176	498806	342770
306	tr|Q5BJT9|Q5BJT9_RAT	Creatine kinase OS=Rattus norvegicus OX=10116 GN=Ckmt1 PE=1 SV=1	66621.8	124158	132795	38488.9	90069.5	45259.2	63039.3	93736.1	187185	113286	107889	79616.4
307	sp|Q8CJD3|ZG16_RAT	Zymogen granule membrane protein 16 OS=Rattus norvegicus OX=10116 GN=Zg16 PE=2 SV=1	948857	460323	829901	418981	45009.7	430882	419665	701375	820742	660811	97214.3	166212
308	tr|A0A0G2JSK5|A0A0G2JSK5_RAT	Integrin beta OS=Rattus norvegicus OX=10116 GN=Itgb1 PE=1 SV=1	82249.2	93098.8	75831.8	57981.6	47557.5	82787.7	66298.1	49947.2	57170.9	96128.5	31307.2	40409.9
309	sp|Q63798|PSME2_RAT	Proteasome activator complex subunit 2 OS=Rattus norvegicus OX=10116 GN=Psme2 PE=2 SV=3	99027.5	88041	91145.7	107298	86474	65594.5	79255.5	121327	86182.8	53425	148278	59934.6
310	tr|A0A0G2K1L0|A0A0G2K1L0_RAT	Tenascin C OS=Rattus norvegicus OX=10116 GN=Tnc PE=1 SV=1	52101.4	102225	71628	71961.1	56401.1	77115.1	73661.8	108402	77496.7	96800.8	35934	46808.1
311	sp|P13084|NPM_RAT	Nucleophosmin OS=Rattus norvegicus OX=10116 GN=Npm1 PE=1 SV=1	64927.1	91488.5	75253.4	88580.5	92003.5	78135	35864.9	47951.7	37307.3	34200.2	70401	30902.8
312	sp|P21708|MK03_RAT	Mitogen-activated protein kinase 3 OS=Rattus norvegicus OX=10116 GN=Mapk3 PE=1 SV=5	33980.7	33761.9	31684.9	33022.8	24022	18303.2	21999.3	20804.1	29225.9	18837.8	26095.7	17945.7
313	sp|P04639|APOA1_RAT	Apolipoprotein A-I OS=Rattus norvegicus OX=10116 GN=Apoa1 PE=1 SV=2	35773.2	34663.7	37816.4	45228.4	27771.7	18211	53331.3	59762.9	45085.7	29548.6	43908.2	29155.8
314	tr|F1LST1|F1LST1_RAT	Fibronectin OS=Rattus norvegicus OX=10116 GN=Fn1 PE=1 SV=3	22933.6	40455.8	44585.2	22815.3	32634.1	36483.2	17390.6	23869.9	28619	33489.8	12175.3	28315.6
315	sp|Q06606|GRZ2_RAT	Granzyme-like protein 2 OS=Rattus norvegicus OX=10116 GN=Mcpt10 PE=2 SV=1	58943	192512	69025.8	62111.9	96804.3	83711.4	20137	50016.9	25587.4	32211.7	135651	27886.1
316	sp|P01946|HBA_RAT	Hemoglobin subunit alpha-1/2 OS=Rattus norvegicus OX=10116 GN=Hba1 PE=1 SV=3	3.35835e+06	5.49704e+06	3.91007e+06	7.23538e+06	6.98703e+06	4.3166e+06	4.02775e+06	5.16766e+06	5.57565e+06	4.20183e+06	6.72355e+06	4.47282e+06
317	tr|Q5PQK2|Q5PQK2_RAT	FUS RNA-binding protein OS=Rattus norvegicus OX=10116 GN=Fus PE=1 SV=1	21201.5	29121.3	23922.6	25776.5	40651	24463.1	26657.2	26785.4	20958.7	31237.5	33675.9	24049
318	tr|A0A0G2JZ52|A0A0G2JZ52_RAT	Heterogeneous nuclear ribonucleoprotein U OS=Rattus norvegicus OX=10116 GN=Hnrnpu PE=1 SV=1	105892	93783.2	87497.1	69652.3	69680.2	101445	94849.5	81791.2	66186.8	81493	52289.5	86276.5
319	sp|Q9Z1Z9|PDLI7_RAT	PDZ and LIM domain protein 7 OS=Rattus norvegicus OX=10116 GN=Pdlim7 PE=1 SV=1	69466.5	109389	91016.3	64513.7	109700	54541.5	46953.5	50387	85934.9	99267.5	38811.1	74119.5
320	tr|A0A0G2K9A2|A0A0G2K9A2_RAT	Arp2/3 complex 34 kDa subunit OS=Rattus norvegicus OX=10116 GN=Arpc2 PE=1 SV=1	62145.9	58411.1	58767.5	46906.8	36858.4	52801.8	43613.4	52835.1	50271.3	45484.2	17749.5	40800
321	tr|Q6P792|Q6P792_RAT	Four and a half LIM domains 1 OS=Rattus norvegicus OX=10116 GN=Fhl1 PE=1 SV=1	36892.2	38997.4	41138.7	20787.4	28822.9	41187.2	29273.1	33252.9	38340	39129.5	6973.33	29930.6
322	sp|Q8CG45|ARK72_RAT	Aflatoxin B1 aldehyde reductase member 2 OS=Rattus norvegicus OX=10116 GN=Akr7a2 PE=1 SV=2	99385.2	76299.8	86975	85578.3	70739.9	70924.4	71605.9	111020	69456.7	62697.7	87388.2	67526.3
323	sp|P21571|ATP5J_RAT	ATP synthase-coupling factor 6, mitochondrial OS=Rattus norvegicus OX=10116 GN=Atp5pf PE=1 SV=1	17240.4	17269.8	45213.2	30571.3	31217.4	21375.1	44305.1	43683.9	31994.5	29538.7	50489.9	32291
324	sp|P02692|FABPL_RAT	Fatty acid-binding protein, liver OS=Rattus norvegicus OX=10116 GN=Fabp1 PE=1 SV=1	557089	171731	569147	228202	87672	289934	261976	937068	418958	132946	72698	77228.1
325	sp|P62250|RS16_RAT	40S ribosomal protein S16 OS=Rattus norvegicus OX=10116 GN=Rps16 PE=1 SV=2	259412	243788	240450	185463	161832	247507	215328	245192	254937	232656	108879	199009
326	tr|Q45QJ4|Q45QJ4_RAT	1-phosphatidylinositol 4,5-bisphosphate phosphodiesterase OS=Rattus norvegicus OX=10116 GN=Plcb3 PE=1 SV=1	39030.7	32361.9	33792.3	19453.1	25235.3	29970.3	11056.9	12869.9	29718.3	11365.2	5750.61	13940.9
327	sp|P21807|PERI_RAT	Peripherin OS=Rattus norvegicus OX=10116 GN=Prph PE=1 SV=1	26291	39895.4	40220.3	26489.9	56435.1	35308.5	25236	30794.6	26902.6	37849.8	40894.3	46573.6
328	sp|Q5RJR8|LRC59_RAT	Leucine-rich repeat-containing protein 59 OS=Rattus norvegicus OX=10116 GN=Lrrc59 PE=1 SV=1	104744	96350	122339	129728	81994.6	98912.1	79141.2	68046.5	82575.8	67972.7	79914.3	76565.3
329	tr|A0A0G2KB63|A0A0G2KB63_RAT	Prohibitin OS=Rattus norvegicus OX=10116 GN=Phb2 PE=1 SV=1	123470	116137	33663.8	158808	95769.5	34646.2	25132.4	71307.8	56878.5	58841.6	42144	43382.8
330	sp|Q91Y81|SEPT2_RAT	Septin-2 OS=Rattus norvegicus OX=10116 GN=Septin2 PE=1 SV=1	24382.4	45891.3	39790.1	14790.1	37124.8	38785.4	19990.2	20096.9	24601.2	32739.4	14698.1	27132.4
331	tr|A0A0G2K757|A0A0G2K757_RAT	Dolichyl-diphosphooligosaccharide--protein glycosyltransferase subunit 2 OS=Rattus norvegicus OX=10116 GN=Rpn2 PE=1 SV=1	48706.4	40291.9	38393.9	31520.3	30341.2	35392.6	24475.1	38933.2	40004	46464.4	35244.6	24613.5
332	sp|P09895|RL5_RAT	60S ribosomal protein L5 OS=Rattus norvegicus OX=10116 GN=Rpl5 PE=1 SV=3	150052	103475	146444	80909.8	71898.2	129929	109466	171282	144779	110726	49900.8	82520.6
333	tr|A0A0G2KB56|A0A0G2KB56_RAT	Glutamine--fructose-6-phosphate transaminase (isomerizing) OS=Rattus norvegicus OX=10116 GN=Gfpt1 PE=1 SV=1	48314.8	38439.4	42827.5	51617.3	21883.3	34451.5	39081	51882	44901.3	32570.2	28986.6	22422.9
334	tr|D4ABA5|D4ABA5_RAT	RCG35999, isoform CRA_a OS=Rattus norvegicus OX=10116 GN=Smtn PE=1 SV=1	39444.7	48058.9	51977.7	26376	49916.4	30932.5	51125.1	49316.3	44021.9	56949.1	46892.3	59315.4
335	tr|D4A5L9|D4A5L9_RAT	Cytochrome c domain-containing protein OS=Rattus norvegicus OX=10116 PE=3 SV=1	53473.5	52917.8	55539	69972.4	58787.2	44246.8	39197.6	56450.3	55789.5	35099.1	49063.2	43103.1
336	sp|P26772|CH10_RAT	10 kDa heat shock protein, mitochondrial OS=Rattus norvegicus OX=10116 GN=Hspe1 PE=1 SV=3	534337	490456	508371	650942	496842	410554	355488	566820	546439	302940	836570	470090
337	sp|P52944|PDLI1_RAT	PDZ and LIM domain protein 1 OS=Rattus norvegicus OX=10116 GN=Pdlim1 PE=1 SV=4	27446.5	20293.5	22830.2	20486.4	12794.9	18891.7	15717.5	22854.6	19987.7	15103.2	7657.53	9158.42
338	tr|D3ZRM9|D3ZRM9_RAT	60S ribosomal protein L13 OS=Rattus norvegicus OX=10116 GN=LOC100360491 PE=3 SV=1	119858	125286	96744.4	82503.9	81433.3	126728	119040	108652	129973	110003	41958.3	84064.6
339	sp|Q9JJ54|HNRPD_RAT	Heterogeneous nuclear ribonucleoprotein D0 OS=Rattus norvegicus OX=10116 GN=Hnrnpd PE=1 SV=2	111964	108535	85059.6	146868	134159	84680.3	86265.9	74142.8	85959.4	69938.5	101658	95794.1
340	tr|D3ZFQ8|D3ZFQ8_RAT	Cytochrome c-1 OS=Rattus norvegicus OX=10116 GN=Cyc1 PE=1 SV=3	171790	152810	156718	189590	130301	144297	163400	214423	202944	193562	174155	161932
341	sp|B0BNA5|COTL1_RAT	Coactosin-like protein OS=Rattus norvegicus OX=10116 GN=Cotl1 PE=1 SV=1	66941.4	27981.1	54793.5	50755.1	55528.8	62736.8	41033.8	37251.1	49185.5	23864.2	36986	65608.9
342	sp|P10888|COX41_RAT	Cytochrome c oxidase subunit 4 isoform 1, mitochondrial OS=Rattus norvegicus OX=10116 GN=Cox4i1 PE=1 SV=1	380375	272448	415700	329524	205660	352342	369798	398474	412212	399926	317745	308845
343	sp|Q6MG61|CLIC1_RAT	Chloride intracellular channel protein 1 OS=Rattus norvegicus OX=10116 GN=Clic1 PE=1 SV=1	31688.9	39891.1	53397.6	59582.1	38162.5	48467.4	35075	40195.5	29797.8	24624.4	34809.7	40568.5
344	sp|P68511|1433F_RAT	14-3-3 protein eta OS=Rattus norvegicus OX=10116 GN=Ywhah PE=1 SV=2	53710.4	45120.2	50745.6	67682.4	54352	40903.8	19301.1	26854.3	22690.9	19516.1	33815.3	23419.5
345	sp|P23358|RL12_RAT	60S ribosomal protein L12 OS=Rattus norvegicus OX=10116 GN=Rpl12 PE=2 SV=1	138734	120689	138682	149878	118339	143326	140719	160684	155982	149659	150918	128228
346	tr|A0A0G2KAJ7|A0A0G2KAJ7_RAT	Collagen alpha-1(XII) chain OS=Rattus norvegicus OX=10116 GN=Col12a1 PE=1 SV=1	46006.4	72343.1	63360.6	34805.3	69420.8	80446.3	29733.7	29063.2	47345	70626.6	5811.13	60659.9
347	sp|P52555|ERP29_RAT	Endoplasmic reticulum resident protein 29 OS=Rattus norvegicus OX=10116 GN=Erp29 PE=1 SV=2	55089.1	58468.3	57136.3	69454.1	55839.6	54926.3	270.144	36294.6	60902.3	46832.5	69213.3	54404.9
348	sp|Q6P6R2|DLDH_RAT	Dihydrolipoyl dehydrogenase, mitochondrial OS=Rattus norvegicus OX=10116 GN=Dld PE=1 SV=1	48424.3	50174	40646.1	40126.6	36250	32560.1	26934	34011.3	33765.6	30754	12777.9	24663.6
349	tr|M0RCY2|M0RCY2_RAT	40S ribosomal protein S13 OS=Rattus norvegicus OX=10116 PE=3 SV=1	116986	134533	103971	171386	135972	101457	42826.6	51482.2	123818	72100.7	101661	89677.9
350	tr|E2RUH2|E2RUH2_RAT	Ribonuclease inhibitor OS=Rattus norvegicus OX=10116 GN=Rnh1 PE=1 SV=1	53466.5	48530.2	43561.5	45651.6	50697.2	44572.8	34054.1	47503.8	41613	28483.8	30747.8	32406.3
351	sp|Q91ZN1|COR1A_RAT	Coronin-1A OS=Rattus norvegicus OX=10116 GN=Coro1a PE=1 SV=3	131778	88970.4	78165.2	92023.3	86084.8	119905	141153	116556	75003.5	110254	70280.3	154062
352	sp|P62944|AP2B1_RAT	AP-2 complex subunit beta OS=Rattus norvegicus OX=10116 GN=Ap2b1 PE=1 SV=1	3668.35	4343.48	540.09	2230.51	304.742	1256.93	0	124.129	0	110.319	104.97	92.0971
353	sp|P61589|RHOA_RAT	Transforming protein RhoA OS=Rattus norvegicus OX=10116 GN=Rhoa PE=1 SV=1	128290	116043	110534	105798	107415	120032	130309	159021	132816	102751	71503.7	99889.3
354	tr|Q3MHS7|Q3MHS7_RAT	GDP-D-mannose dehydratase OS=Rattus norvegicus OX=10116 GN=Gmds PE=2 SV=1	59147.5	49382.2	51873.1	37931.9	30138.9	49274.9	43326.2	54304.5	68467	40508.9	24173	28623.5
355	tr|A0A0H2UHM3|A0A0H2UHM3_RAT	Haptoglobin OS=Rattus norvegicus OX=10116 GN=Hp PE=1 SV=1	43148.9	56325.8	65784.2	18504.6	59687.8	49173.8	37124.7	62254.7	40985	26586.7	56289.2	51643.2
356	tr|F1LM84|F1LM84_RAT	Nidogen-1 OS=Rattus norvegicus OX=10116 GN=Nid1 PE=1 SV=1	37602.9	64356.1	56949.2	23506.7	62534.1	52655.9	14052.6	31635.4	37692.4	62607.7	12742.5	41861.8
357	sp|P61314|RL15_RAT	60S ribosomal protein L15 OS=Rattus norvegicus OX=10116 GN=Rpl15 PE=1 SV=2	60920	81622	66285.8	39323.8	38756.9	82551.9	61710.2	62474.1	49612.8	80979.5	22821.2	55867.9
358	sp|P68101|IF2A_RAT	Eukaryotic translation initiation factor 2 subunit 1 OS=Rattus norvegicus OX=10116 GN=Eif2s1 PE=1 SV=2	25715.9	25405.1	26449.6	19071.8	24124.9	26778.4	26481.9	27394.6	28803.6	25639	11697.7	23943.1
359	tr|D3ZC07|D3ZC07_RAT	Protein SET OS=Rattus norvegicus OX=10116 GN=Pkn3 PE=1 SV=3	32460.5	38758.7	19174.8	74113.3	73679.4	20355.4	28518	32387	31792.7	26393.7	52216.1	26963.8
360	sp|P04762|CATA_RAT	Catalase OS=Rattus norvegicus OX=10116 GN=Cat PE=1 SV=3	23781.1	12100	13102.6	28405	17649.5	24522.1	14821.3	27298.8	25968.4	19382.4	17309	17457.6
361	tr|A0A140TAB4|A0A140TAB4_RAT	Core histone macro-H2A OS=Rattus norvegicus OX=10116 GN=H2afy PE=1 SV=1	98608.9	94669.1	83007	83008.2	93915.7	128432	66707.2	59479.6	83724.8	99109.5	51586.5	133942
362	sp|D3ZBN0|H15_RAT	Histone H1.5 OS=Rattus norvegicus OX=10116 GN=H1-5 PE=1 SV=1	66181.4	22883.3	137733	28220.7	36109.5	210628	167075	68922.6	86893.9	213513	159051	139704
363	sp|O55159|EPCAM_RAT	Epithelial cell adhesion molecule OS=Rattus norvegicus OX=10116 GN=Epcam PE=1 SV=1	114130	92870.8	105603	88751.1	40909.7	88563	48027.2	30525	65512.1	73144.2	27995.8	41048.6
364	sp|P19511|AT5F1_RAT	ATP synthase F(0) complex subunit B1, mitochondrial OS=Rattus norvegicus OX=10116 GN=Atp5pb PE=1 SV=1	209071	187775	223517	211777	147847	165169	194584	233031	213672	230530	144450	164831
365	sp|P13221|AATC_RAT	Aspartate aminotransferase, cytoplasmic OS=Rattus norvegicus OX=10116 GN=Got1 PE=1 SV=3	32270.9	27539.7	23743.9	33310.9	29050.4	21771	17046.1	22776.4	25947.7	17970.9	21856.5	13240.9
366	tr|A0A0G2JXD0|A0A0G2JXD0_RAT	60S ribosomal protein L9 OS=Rattus norvegicus OX=10116 GN=LOC103692829 PE=3 SV=1	73804.3	52851.7	71514.5	64194.9	40308.6	72739.9	67862.1	83206.4	71958.3	67415.1	32027.2	50379.4
367	tr|G3V6T1|G3V6T1_RAT	Coatomer subunit alpha OS=Rattus norvegicus OX=10116 GN=Copa PE=1 SV=1	70942.2	59446.4	59905.5	60623.1	43527.5	54148.2	43105.3	69171.3	60069	49900.5	37791	36351.6
368	sp|Q9JJ19|NHRF1_RAT	Na(+)/H(+) exchange regulatory cofactor NHE-RF1 OS=Rattus norvegicus OX=10116 GN=Slc9a3r1 PE=1 SV=3	87008.8	40882.7	85163.2	70408.3	27999.8	48734.7	68484.9	125473	72878.2	40803.3	57427.5	27507.3
369	sp|P11240|COX5A_RAT	Cytochrome c oxidase subunit 5A, mitochondrial OS=Rattus norvegicus OX=10116 GN=Cox5a PE=1 SV=1	77269.5	104425	93208.2	158731	115897	46795.1	40080.4	51686.5	97206.5	48042	103662	84401.5
370	tr|A0A0G2JZR4|A0A0G2JZR4_RAT	Ras-related protein Rab-11B OS=Rattus norvegicus OX=10116 GN=Rab11b PE=1 SV=1	79031.8	89136.6	77904.2	97290.5	79166.1	80013.4	68717.1	95248	92806.7	80674.2	60635.5	59309.6
371	sp|P60901|PSA6_RAT	Proteasome subunit alpha type-6 OS=Rattus norvegicus OX=10116 GN=Psma6 PE=1 SV=1	64275.6	59060.6	64723.1	48952.6	44592.4	60718.6	24577.2	32773.9	26701.8	22795	14370.8	26202.1
372	sp|P24329|THTR_RAT	Thiosulfate sulfurtransferase OS=Rattus norvegicus OX=10116 GN=Tst PE=1 SV=3	65406.4	37085.1	55178	58782.3	19480.4	33981.2	40553.1	62478.9	52450.9	39487.3	47731.4	16949.2
373	sp|P14408|FUMH_RAT	Fumarate hydratase, mitochondrial OS=Rattus norvegicus OX=10116 GN=Fh PE=1 SV=2	50784.1	48577.1	41641.2	56181.4	42778.2	41604.1	40515.8	46645.3	38237.1	31852.1	36942.6	35924.3
374	tr|Q5XI19|Q5XI19_RAT	Fermitin family homolog 2 (Drosophila) OS=Rattus norvegicus OX=10116 GN=Fermt2 PE=1 SV=1	29158.8	35449.2	30789.4	18835.6	40072.4	27511	23096.1	26458	26483	30776.9	15345.4	32737.9
375	tr|Q6P136|Q6P136_RAT	Hyou1 protein OS=Rattus norvegicus OX=10116 GN=Hyou1 PE=1 SV=1	19214.3	16891.8	13373.7	31901.6	28674.7	23983.5	15102.3	24143.5	10998.1	20078.7	10112.9	25744.4
376	tr|G3V624|G3V624_RAT	Coronin OS=Rattus norvegicus OX=10116 GN=Coro1c PE=1 SV=1	47282.2	124213	83404.4	59564.6	76478.7	66374.5	51280.1	59117.6	60276.2	77631.1	21488.9	61104
377	sp|P43527|CASP1_RAT	Caspase-1 OS=Rattus norvegicus OX=10116 GN=Casp1 PE=2 SV=1	38238.9	25702.7	33892.4	37639.2	20237.3	28329.1	6974.21	8176.71	22109.8	14150.1	15165.7	17135.9
378	tr|G3V729|G3V729_RAT	Bone marrow proteoglycan OS=Rattus norvegicus OX=10116 GN=Prg2 PE=1 SV=1	380303	676493	416752	223268	432683	865175	377324	393804	590901	673010	111618	457577
379	tr|Q5RK10|Q5RK10_RAT	60S ribosomal protein L13a OS=Rattus norvegicus OX=10116 GN=Rpl13a PE=1 SV=1	68245	63418.8	71440.2	54752.8	35054.5	85208.2	77440.9	67328.2	78363.7	73839.8	34652.8	54437.2
380	tr|G3V6P2|G3V6P2_RAT	Dihydrolipoyllysine-residue succinyltransferase component of 2-oxoglutarate dehydrogenase complex, mitochondrial OS=Rattus norvegicus OX=10116 GN=Dlst PE=1 SV=1	105182	97325.1	121599	96427.5	76126.9	102125	107037	131935	118478	112531	62822.4	97786.3
381	tr|F1M8E9|F1M8E9_RAT	1,4-beta-N-acetylmuramidase C OS=Rattus norvegicus OX=10116 GN=Lyz2 PE=1 SV=1	349502	465784	331503	365969	847432	548461	333196	427719	457751	431916	705396	550313
382	tr|Q6AXR6|Q6AXR6_RAT	Glutathione-dependent dehydroascorbate reductase OS=Rattus norvegicus OX=10116 GN=Gsto1 PE=1 SV=1	83274.7	75321.2	50413.6	92748.4	53094.8	55194.4	54263.6	71788	65959.4	51495	49965.7	28585.4
383	sp|Q9EQX9|UBE2N_RAT	Ubiquitin-conjugating enzyme E2 N OS=Rattus norvegicus OX=10116 GN=Ube2n PE=1 SV=1	69978.9	79074.3	76293.9	119782	98737.1	63835.7	99486.9	107677	85198.9	74038.8	126482	81935.9
384	tr|Q5XFV4|Q5XFV4_RAT	Adipocyte-type fatty acid-binding protein OS=Rattus norvegicus OX=10116 GN=Fabp4 PE=1 SV=1	55611.5	138025	105997	61446.6	79683.4	93456.7	69193.6	68709.6	126613	86530.4	48497.7	76754.9
385	tr|A0A0G2JSH9|A0A0G2JSH9_RAT	Peroxiredoxin-2 OS=Rattus norvegicus OX=10116 GN=Prdx2 PE=1 SV=1	113235	135893	133420	116044	108926	156472	59713.1	83144.9	107161	99046.6	19094.4	94349.6
386	sp|P0C219|SLMAP_RAT	Sarcolemmal membrane-associated protein OS=Rattus norvegicus OX=10116 GN=Slmap PE=1 SV=1	47943.1	58541.6	42436	72086.1	94517.7	41270.4	31393	26281.6	45952.1	50587.7	46164.1	78454.3
387	sp|P62982|RS27A_RAT	Ubiquitin-40S ribosomal protein S27a OS=Rattus norvegicus OX=10116 GN=Rps27a PE=1 SV=2	464279	393508	415638	249028	488543	614029	358280	492293	437051	669033	322933	362854
388	tr|F1LM05|F1LM05_RAT	Serine protease inhibitor A3N OS=Rattus norvegicus OX=10116 GN=LOC299282 PE=1 SV=1	23830.9	32509	22730.7	55073.5	23319.5	18502	7928.75	16305	17324.5	14666.5	23633.3	19084.5
389	sp|P62246|RS15A_RAT	40S ribosomal protein S15a OS=Rattus norvegicus OX=10116 GN=Rps15a PE=1 SV=2	151151	159441	102727	161011	137267	133030	163309	182087	145877	150495	126675	131518
390	sp|P07340|AT1B1_RAT	Sodium/potassium-transporting ATPase subunit beta-1 OS=Rattus norvegicus OX=10116 GN=Atp1b1 PE=1 SV=1	76765	42741.1	56932.1	45355.5	12831.3	42786.8	56697	77190.1	65996.8	43802.2	16641.1	19254.8
391	tr|Q6AYU5|Q6AYU5_RAT	Poly(rC)-binding protein 2 OS=Rattus norvegicus OX=10116 GN=Pcbp2 PE=1 SV=1	66822	71057.1	46904.6	99205.6	79570	45325.9	27579.4	50386.7	49688.5	45773.2	77251.5	48969.8
392	tr|Q498N2|Q498N2_RAT	Amine oxidase OS=Rattus norvegicus OX=10116 GN=Aoc1 PE=2 SV=1	61573.3	53023.4	67869.3	26794.5	21107.6	51648.7	40500.3	58938.9	51014.3	50051.9	16566	28600
393	sp|P18420|PSA1_RAT	Proteasome subunit alpha type-1 OS=Rattus norvegicus OX=10116 GN=Psma1 PE=1 SV=2	37115.5	36256.3	42213.4	39197	35009.4	38045.4	38973.6	49312.6	42775.9	30691.8	46579.4	30264.7
394	tr|B5DEN5|B5DEN5_RAT	Elongation factor 1-beta OS=Rattus norvegicus OX=10116 GN=Eef1b2 PE=1 SV=1	27310.3	33637.7	25872.9	49259.5	39214.6	29974.9	15665.5	11106.9	20391.9	23478.7	38463.9	27263.8
395	sp|O88767|PARK7_RAT	Parkinson disease protein 7 homolog OS=Rattus norvegicus OX=10116 GN=Park7 PE=1 SV=1	126162	118927	135172	168937	145066	125579	133708	162793	128627	107255	151721	123789
396	tr|B2RZ72|B2RZ72_RAT	Actin-related protein 2/3 complex subunit 4 OS=Rattus norvegicus OX=10116 GN=Arpc4 PE=1 SV=1	154983	189623	210893	96188.5	144804	149372	126366	125029	209325	120959	90885.8	136627
397	tr|D3ZG43|D3ZG43_RAT	Complex I-30kD OS=Rattus norvegicus OX=10116 GN=Ndufs3 PE=1 SV=1	46828.7	39000.8	42731.6	26755.1	31232.4	30130.8	25439.3	34942.4	39766.6	40683.5	12235.2	39287.1
398	sp|P54313|GBB2_RAT	Guanine nucleotide-binding protein G(I)/G(S)/G(T) subunit beta-2 OS=Rattus norvegicus OX=10116 GN=Gnb2 PE=1 SV=4	21203.7	21308.2	22626.3	13782.7	14769.8	24860.3	18435.5	24629.8	24210.1	22572.2	6309.12	19213.5
399	sp|Q6RUV5|RAC1_RAT	Ras-related C3 botulinum toxin substrate 1 OS=Rattus norvegicus OX=10116 GN=Rac1 PE=1 SV=1	85596.9	74101	82237.1	58608	57827.5	82052.1	80422.6	90369.3	75163.7	73145.9	49414.5	66291.7
400	tr|D3ZD09|D3ZD09_RAT	Cytochrome c oxidase subunit OS=Rattus norvegicus OX=10116 GN=Cox6b1 PE=1 SV=1	31398.4	72589.1	35936.7	53770	92473	33624	36296.5	34206	34200.4	53592	82568.3	51477.5
401	tr|A0A0H2UHS7|A0A0H2UHS7_RAT	60S ribosomal protein L18 OS=Rattus norvegicus OX=10116 GN=Rpl18 PE=1 SV=1	162156	148320	169661	125121	92084.2	183338	101438	110579	115167	106186	39782.8	96028.8
402	sp|Q9EST6|AN32B_RAT	Acidic leucine-rich nuclear phosphoprotein 32 family member B OS=Rattus norvegicus OX=10116 GN=Anp32b PE=1 SV=1	55993.3	80201.9	74530.7	119108	114356	53540.9	50208.8	57526.5	88021.1	67435.4	114224	84580
403	tr|A0A0G2K459|A0A0G2K459_RAT	Mitochondrial carrier 2 OS=Rattus norvegicus OX=10116 GN=Mtch2 PE=1 SV=1	45540.2	24624.7	33086	30698.8	25979.6	44858.6	32145.4	43897.3	48691.2	35957.1	20304.5	26163.6
404	sp|P62083|RS7_RAT	40S ribosomal protein S7 OS=Rattus norvegicus OX=10116 GN=Rps7 PE=1 SV=1	142184	115901	85256.6	117924	72901.3	84056.8	54987.2	70770.7	57559.5	50543.7	25878.6	53035.5
405	sp|P31044|PEBP1_RAT	Phosphatidylethanolamine-binding protein 1 OS=Rattus norvegicus OX=10116 GN=Pebp1 PE=1 SV=3	58793.1	60300.2	50362.8	67417.3	68650.6	49474.3	52070.4	54720.5	44265.7	40638.2	80713.7	47459.8
406	tr|A0A140TAI3|A0A140TAI3_RAT	Heterogeneous nuclear ribonucleoprotein C, isoform CRA_b OS=Rattus norvegicus OX=10116 GN=Hnrnpc PE=1 SV=1	39939.3	38570.4	34071.6	35964.2	34724.6	39157.2	25457.1	30069.6	31609.5	30800.9	31060.2	38057.7
407	tr|Q9QX81|Q9QX81_RAT	Heterogeneous nuclear ribonucleoprotein A/B OS=Rattus norvegicus OX=10116 GN=Hnrnpab PE=1 SV=1	131903	137159	118915	167993	153162	136085	165815	160302	154920	130830	193544	125945
408	sp|P62890|RL30_RAT	60S ribosomal protein L30 OS=Rattus norvegicus OX=10116 GN=Rpl30 PE=3 SV=2	115673	107543	92955	84056.1	67526.5	100906	64161.9	81570	75082.1	63337.5	35601.1	71327.4
409	sp|P13832|MRLCA_RAT	Myosin regulatory light chain RLC-A OS=Rattus norvegicus OX=10116 GN=Rlc-a PE=2 SV=2	24091.3	31821.4	19793.2	27082.7	31587.3	16302.3	8178.74	9555.76	11195.3	9073.72	14390.5	11954.1
410	sp|P21531|RL3_RAT	60S ribosomal protein L3 OS=Rattus norvegicus OX=10116 GN=Rpl3 PE=1 SV=3	76583.7	40541.2	65553.9	46290.3	44238.9	57478.4	36438.3	81629.8	48707.3	41793.3	20424.2	27091.2
411	sp|P97536|CAND1_RAT	Cullin-associated NEDD8-dissociated protein 1 OS=Rattus norvegicus OX=10116 GN=Cand1 PE=1 SV=1	35871.7	34045.1	35409.1	43778.4	36938.1	29987.3	26137.8	35677.9	30471.3	29672	28712	31408.6
412	tr|B1WC67|B1WC67_RAT	RCG29001 OS=Rattus norvegicus OX=10116 GN=Slc25a24 PE=1 SV=1	76209.6	49673.1	65861.7	72893.2	34047.9	33467.3	26625.6	48991.9	33371	35429.4	50367	33808.1
413	sp|P05708|HXK1_RAT	Hexokinase-1 OS=Rattus norvegicus OX=10116 GN=Hk1 PE=1 SV=4	68884.1	72204.4	42974.7	38673.6	40043.8	42564.5	33255	42733.8	83541.7	63449.6	14206.6	58464.2
414	tr|A0A0H2UHU0|A0A0H2UHU0_RAT	40S ribosomal protein S25 OS=Rattus norvegicus OX=10116 GN=Rps25 PE=3 SV=1	109297	91233.4	132258	112392	109056	127177	140871	140654	109817	113852	175149	114633
415	tr|A0A0G2K151|A0A0G2K151_RAT	Apolipoprotein E OS=Rattus norvegicus OX=10116 GN=Apoe PE=1 SV=1	13930.6	16636.2	22954.2	26827.7	18681.7	19756	29111	31975	33050.7	23557.7	50429.2	19158.1
416	tr|A0A0G2JXC3|A0A0G2JXC3_RAT	40S ribosomal protein S21 OS=Rattus norvegicus OX=10116 GN=Rps21 PE=1 SV=1	62015.7	53382.2	54235.1	60382	53621.9	59537.7	68041.2	69502	70915.9	50655.6	80319	51566.6
417	tr|F1M792|F1M792_RAT	Acid maltase OS=Rattus norvegicus OX=10116 GN=Si PE=3 SV=2	54376.9	11246.6	83461.1	26424.9	9517.53	33862.1	50279.5	72914.9	59359.1	26674.9	12490.1	9985.32
418	tr|F1LQ55|F1LQ55_RAT	Non-specific lipid-transfer protein OS=Rattus norvegicus OX=10116 GN=Scp2 PE=1 SV=3	53517.3	38567.6	55695	39330.7	27311.5	42280.9	49274.6	71291.3	53722.8	33176.7	53690.6	20257.6
419	sp|Q920A6|RISC_RAT	Retinoid-inducible serine carboxypeptidase OS=Rattus norvegicus OX=10116 GN=Scpep1 PE=2 SV=1	43759.1	33640.6	39896.4	31617.6	58612.7	45517.5	19053.2	22625.7	11733.1	15560.7	18295.8	21890.8
420	sp|Q62636|RAP1B_RAT	Ras-related protein Rap-1b OS=Rattus norvegicus OX=10116 GN=Rap1b PE=1 SV=2	13373.4	13325.3	10997.5	9063.69	13471.9	18646.9	13387.1	12803.9	13662.7	15680.6	11327.9	14275.7
421	tr|F1LP82|F1LP82_RAT	Ras-related protein Rab-2A OS=Rattus norvegicus OX=10116 GN=Rab2a PE=1 SV=3	6240.64	4535.52	4118.55	6413.89	4717.02	5102.47	5749.83	5585.7	8070.84	6127.96	1962.86	4039.03
422	tr|F7EL36|F7EL36_RAT	Acidic leucine-rich nuclear phosphoprotein 32 family member A OS=Rattus norvegicus OX=10116 GN=Anp32a PE=1 SV=2	65495	59024.3	72033.8	73924.8	56790.4	77399.3	20681.6	15593.6	17588	15845.9	32344.8	59850.3
423	sp|P52925|HMGB2_RAT	High mobility group protein B2 OS=Rattus norvegicus OX=10116 GN=Hmgb2 PE=2 SV=2	2112.42	3183.7	1893.3	4492.26	6995.38	3614.98	524.601	819.232	1111.85	6473.23	9962.72	3673.91
424	sp|Q3T1K5|CAZA2_RAT	F-actin-capping protein subunit alpha-2 OS=Rattus norvegicus OX=10116 GN=Capza2 PE=1 SV=1	73196.5	97296.9	58797.9	63511.8	69364	43312.6	30315.4	24153.8	64752.5	48947.9	39155	60967.3
425	tr|A0A0G2K6X9|A0A0G2K6X9_RAT	Adenosine kinase OS=Rattus norvegicus OX=10116 GN=Adk PE=1 SV=1	34668.4	29974.2	30271.6	19896.5	24531.6	33180.2	26553.8	27951.4	28310.7	25326.4	23671.5	21546.5
426	tr|G3V8A5|G3V8A5_RAT	Vacuolar protein sorting-associated protein 35 OS=Rattus norvegicus OX=10116 GN=Vps35 PE=1 SV=1	49890.1	47863.1	54449.2	60410.8	53094.8	43781.9	37013.5	51370.6	44664.2	49973	42398	39055.7
427	sp|Q99J82|ILK_RAT	Integrin-linked protein kinase OS=Rattus norvegicus OX=10116 GN=Ilk PE=2 SV=1	54998.2	74707.3	84966.7	78542.5	98556.5	64592	51584.2	55523.9	52837.4	68978.6	45926.5	89040.2
428	tr|I6L9G6|I6L9G6_RAT	TAR DNA-binding protein 43 OS=Rattus norvegicus OX=10116 GN=Tardbp PE=1 SV=1	71347.9	63672.5	63129.3	28214.6	29856.2	40994.7	63472.5	28558.8	46075.8	31748.2	22012.6	33251
429	tr|F1LZX7|F1LZX7_RAT	60S ribosomal protein L17 OS=Rattus norvegicus OX=10116 GN=Rpl17 PE=1 SV=2	127151	83297	83676.4	121630	71390.4	93211.1	103321	112938	106408	85126.5	101485	96880.3
430	tr|A0A0H2UH99|A0A0H2UH99_RAT	60S ribosomal protein L24 OS=Rattus norvegicus OX=10116 GN=Rpl24 PE=1 SV=1	150162	113501	113369	142367	89404.3	167264	130130	87632.3	178160	132734	96442.7	132869
431	sp|P35213|1433B_RAT	14-3-3 protein beta/alpha OS=Rattus norvegicus OX=10116 GN=Ywhab PE=1 SV=3	72348.6	89028.1	79108.7	96492.6	100229	72692.3	81895.9	85648.2	57105.8	61290.9	93025.7	89992
432	tr|Q6P9V6|Q6P9V6_RAT	Proteasome subunit alpha type OS=Rattus norvegicus OX=10116 GN=Psma5 PE=1 SV=1	23339.5	16331.1	21190.7	22111.5	20361.1	20772.3	23641.3	28056.6	22169.6	15393	24921.6	11217.8
433	sp|P97584|PTGR1_RAT	Prostaglandin reductase 1 OS=Rattus norvegicus OX=10116 GN=Ptgr1 PE=2 SV=3	30899.8	28627.4	35417.3	25601.6	18660.4	22524.5	6862.39	17651.8	18467	11174	6672.88	3858.02
434	sp|Q9WVK7|HCDH_RAT	Hydroxyacyl-coenzyme A dehydrogenase, mitochondrial OS=Rattus norvegicus OX=10116 GN=Hadh PE=2 SV=1	76344.3	67804.7	60470.3	76387.1	43159.1	36964.4	33113.5	44703.7	60759	28788	29332.6	28350.7
435	sp|P40329|SYRC_RAT	Arginine--tRNA ligase, cytoplasmic OS=Rattus norvegicus OX=10116 GN=Rars1 PE=1 SV=2	41766.4	32821.4	29232.9	38228.3	21657.2	30985.8	20499.7	28690.3	23102.9	11147.4	21279.2	17970.8
436	tr|Q6P6G9|Q6P6G9_RAT	Helix-destabilizing protein OS=Rattus norvegicus OX=10116 GN=Hnrnpa1 PE=1 SV=1	44951.4	48972.4	26431.2	36100.9	36246.4	37554	27989.3	35918.7	40667.8	29374.1	16690.9	24386
437	tr|G3V6R5|G3V6R5_RAT	Sulfite oxidase OS=Rattus norvegicus OX=10116 GN=Suox PE=1 SV=1	92016.8	43859.9	61046.3	60125.3	25853.3	44796.2	48194.4	101852	65233.1	41517.7	20575	20932.3
438	tr|D4ACS0|D4ACS0_RAT	Protein phosphatase 1 regulatory subunit OS=Rattus norvegicus OX=10116 GN=Ppp1r12a PE=1 SV=2	19368.3	21475.8	18831.3	13853.4	23829.8	17659.4	13672.1	13210.7	13461.8	17014.5	14312.6	22134.6
439	sp|Q6NYB7|RAB1A_RAT	Ras-related protein Rab-1A OS=Rattus norvegicus OX=10116 GN=Rab1A PE=1 SV=3	24871.8	20875.3	36441.3	21554.1	18728.9	33863.9	6860.67	595.54	3159.07	6438.49	2088.2	12672.4
440	tr|F1LPV8|F1LPV8_RAT	Succinate--CoA ligase [GDP-forming] subunit beta, mitochondrial OS=Rattus norvegicus OX=10116 GN=Suclg2 PE=1 SV=2	43694.6	36906.7	49630.6	34139.3	36427.1	29634.3	26045.5	30477.3	33222.6	37125.3	30276.7	36416.8
441	tr|A0A0G2JSR0|A0A0G2JSR0_RAT	Voltage-dependent anion-selective channel protein 3 OS=Rattus norvegicus OX=10116 GN=Vdac3 PE=1 SV=1	88482.6	89957.8	119891	43739.5	58327.5	116587	96933.4	66385.8	92714.1	97489.5	31558	96421.8
442	tr|D4A5G8|D4A5G8_RAT	Pyruvate dehydrogenase E1 component subunit alpha OS=Rattus norvegicus OX=10116 GN=Pdha1l1 PE=1 SV=3	58573.6	51692.6	66080	45149.5	48518.7	41605.9	43151.8	43195.5	50958.2	49111.4	29528.2	55765.8
443	tr|D3ZFR7|D3ZFR7_RAT	PDZ and LIM domain 3, isoform CRA_b OS=Rattus norvegicus OX=10116 GN=Pdlim3 PE=1 SV=1	27742.4	35561.2	30929.9	30116.5	38746.5	21625.6	24576.4	20290.3	25927.4	38956.6	25409.5	33033.8
444	sp|Q5RJR2|TWF1_RAT	Twinfilin-1 OS=Rattus norvegicus OX=10116 GN=Twf1 PE=1 SV=1	44538.4	42723.2	58056.8	32012.4	19873.9	37657.7	34115.7	40997.8	43198.2	34314	9634.73	17413.9
445	sp|Q62658|FKB1A_RAT	Peptidyl-prolyl cis-trans isomerase FKBP1A OS=Rattus norvegicus OX=10116 GN=Fkbp1a PE=1 SV=3	17521.3	33863.7	30112.6	32090.7	34738.8	25512.1	36139.9	37050.3	31755.7	25041.2	30762.3	28108.5
446	tr|B2RZ77|B2RZ77_RAT	Dermatopontin OS=Rattus norvegicus OX=10116 GN=Dpt PE=1 SV=1	60212.7	121029	92052.6	49144.7	105807	118255	53160.3	62967.3	96047.1	97733.5	33708.8	99170.8
447	sp|Q6AYC4|CAPG_RAT	Macrophage-capping protein OS=Rattus norvegicus OX=10116 GN=Capg PE=1 SV=1	10613.8	16221.4	13173.1	19084.3	19380.8	11761.3	8218.83	8819.53	9449.76	980.696	13587.4	12782.5
448	tr|Q6IN39|Q6IN39_RAT	Hsd17b4 protein OS=Rattus norvegicus OX=10116 GN=Hsd17b4 PE=1 SV=1	32260.7	24792.5	36691.1	19133.7	20077	23049	20385	29209.6	26446.4	22437.1	5895.17	17247.5
449	tr|D3Z9E1|D3Z9E1_RAT	Elastin microfibril interfacer 1 OS=Rattus norvegicus OX=10116 GN=Emilin1 PE=1 SV=1	19601.1	24110.7	28300.1	26268.1	20338.8	23683.4	14692.1	25455.7	21290.5	19471.5	30013	30687.7
450	tr|F1LRE1|F1LRE1_RAT	Glutathione-disulfide reductase OS=Rattus norvegicus OX=10116 GN=Gsr PE=1 SV=2	22120.5	24878.2	24313.7	10814	13458.6	23770	12600.4	17119.4	12445.1	17347.6	3575.49	6325.85
451	tr|F1LM47|F1LM47_RAT	Succinate--CoA ligase [ADP-forming] subunit beta, mitochondrial OS=Rattus norvegicus OX=10116 GN=Sucla2 PE=1 SV=1	44968.8	37653.1	44836.7	40323.9	43325.1	29347.2	12966.8	42820	40069.7	42159.6	27603.1	37194.4
452	sp|P62282|RS11_RAT	40S ribosomal protein S11 OS=Rattus norvegicus OX=10116 GN=Rps11 PE=1 SV=3	63895.1	41158.4	55063.9	42234.7	27174.6	73107.8	46519.4	54605	60435.8	48521.5	22764.5	38797.1
453	sp|P62919|RL8_RAT	60S ribosomal protein L8 OS=Rattus norvegicus OX=10116 GN=Rpl8 PE=2 SV=2	99958.1	95215.4	100660	77936.8	68168.7	100725	93930.1	105517	93187	82143.7	40168.2	76820.2
454	tr|F2Z3R2|F2Z3R2_RAT	Heterogeneous nuclear ribonucleoprotein L OS=Rattus norvegicus OX=10116 GN=Hnrnpl PE=1 SV=1	32789.5	32080.2	32359	30500.3	25938.4	33118.1	27077.1	32704.5	30684.6	29838.3	18918.5	23042.1
455	sp|Q68FR9|EF1D_RAT	Elongation factor 1-delta OS=Rattus norvegicus OX=10116 GN=Eef1d PE=1 SV=2	39921.6	30201.3	27950	32796.7	23211.3	31629.9	23820.6	32447.5	24564.5	24307.2	30477.5	31686.7
456	tr|Q5M860|Q5M860_RAT	Rho GDP dissociation inhibitor beta OS=Rattus norvegicus OX=10116 GN=Arhgdib PE=1 SV=1	37310.9	19799.9	24921.5	59042.1	64867.7	42096.8	39963.2	24099.6	11850.9	17410	35072.8	41423.2
457	sp|P00173|CYB5_RAT	Cytochrome b5 OS=Rattus norvegicus OX=10116 GN=Cyb5a PE=1 SV=2	73528.6	55429	86097.6	73355.1	47397.7	59732.2	65877.1	97811.2	81889.3	55616.1	84040.1	47195
458	tr|G3V712|G3V712_RAT	Keratin complex 2, basic, gene 7, isoform CRA_a OS=Rattus norvegicus OX=10116 GN=Krt7 PE=1 SV=1	42487.3	28389.3	25141.9	31818.2	21545.2	29514.7	21753.9	22502.6	23614.8	24881.9	35988	18967
459	tr|B2GV73|B2GV73_RAT	Actin-related protein 2/3 complex subunit 3 OS=Rattus norvegicus OX=10116 GN=Arpc3 PE=1 SV=1	102604	94209.1	67269.7	113311	117773	63646.1	76337.5	120856	74119.7	69276.4	113607	78199.7
460	tr|D4A9D6|D4A9D6_RAT	RNA helicase OS=Rattus norvegicus OX=10116 GN=Dhx9 PE=1 SV=1	33598.5	36535.3	37146.6	24821.9	25201.7	45785.4	22170.8	12295.9	21960.9	20382.4	2936.63	11490.6
461	tr|A0A0G2JXN6|A0A0G2JXN6_RAT	Galectin OS=Rattus norvegicus OX=10116 GN=Lgals3 PE=1 SV=1	65920.9	24658.4	47307.4	34476	9149.45	40955.8	41394.2	77738.5	44736.2	41205	23067.1	11353.9
462	sp|P31430|DPEP1_RAT	Dipeptidase 1 OS=Rattus norvegicus OX=10116 GN=Dpep1 PE=2 SV=2	39812.4	62642.6	38713.8	72795.4	18642.9	41880.3	22383.2	48825.5	33093.1	49451	37040.3	7869.16
463	sp|P20788|UCRI_RAT	Cytochrome b-c1 complex subunit Rieske, mitochondrial OS=Rattus norvegicus OX=10116 GN=Uqcrfs1 PE=1 SV=2	59651.6	50200.3	68444.1	51880.6	41273.3	48576.2	48473.6	64496.3	56440.9	53889.3	34093	47012.1
464	tr|D4A6G6|D4A6G6_RAT	40S ribosomal protein S19 OS=Rattus norvegicus OX=10116 GN=LOC100362339 PE=3 SV=1	16752.2	27944.7	19246.4	29743.4	32359.8	23971.6	759.714	655.39	314.737	161.605	364.277	818.898
465	sp|Q4FZU6|ANXA8_RAT	Annexin A8 OS=Rattus norvegicus OX=10116 GN=Anxa8 PE=1 SV=1	18592.3	21790.9	29526.3	28622.4	19454.6	21775.5	19612.9	20265.5	32889.2	28149.7	19605.3	17878.2
466	tr|M0R6L9|M0R6L9_RAT	Ferritin OS=Rattus norvegicus OX=10116 PE=3 SV=1	32669.2	27274.8	28157.6	39109.1	50805.5	30669.4	2752.13	1206.84	11760.6	10466.6	33850.1	29937.9
467	sp|Q9QZR6|SEPT9_RAT	Septin-9 OS=Rattus norvegicus OX=10116 GN=Septin9 PE=1 SV=1	29244.4	24423.2	30568.2	29505.4	23888.5	28345.9	21518.8	25878.3	26430.8	27297	22572	30086.4
468	tr|M0R6K0|M0R6K0_RAT	Laminin subunit beta-2 OS=Rattus norvegicus OX=10116 GN=Lamb2 PE=1 SV=1	22932.8	37667.4	30606.4	11579.6	30861.7	23551.3	12647.9	15873	23085.7	34009.7	8722.59	25030.8
469	sp|Q5FVM4|NONO_RAT	Non-POU domain-containing octamer-binding protein OS=Rattus norvegicus OX=10116 GN=Nono PE=1 SV=3	48849.3	50622	59560.4	49028.1	43854.8	61952.9	66351.5	57985.6	43306.3	62879.6	31910.6	52285.2
470	tr|A0A0G2K0W9|A0A0G2K0W9_RAT	Proteasome subunit alpha type OS=Rattus norvegicus OX=10116 GN=Psma7 PE=1 SV=1	47654.6	45608.2	52507.9	33227.9	39115.3	39216.6	36020.2	47977	46167.1	36047.2	23932.5	26345.6
471	sp|P97532|THTM_RAT	3-mercaptopyruvate sulfurtransferase OS=Rattus norvegicus OX=10116 GN=Mpst PE=1 SV=3	28099.8	31058.2	33726.2	37425.3	29840.7	22958	16542.3	12816.1	18074.9	11994	15892	11773.7
472	tr|G3V786|G3V786_RAT	Aldo-keto reductase family 1, member B8 OS=Rattus norvegicus OX=10116 GN=Akr1b8 PE=1 SV=1	45786.1	27525.2	41018.9	31851.3	18491.2	21705.6	25799.1	48694.6	30516.3	17228.7	9342.2	11884.8
473	sp|Q641Z6|EHD1_RAT	EH domain-containing protein 1 OS=Rattus norvegicus OX=10116 GN=Ehd1 PE=1 SV=1	27863.7	29267.9	21191.9	37322.5	33309.1	30258.7	19337.2	21986.9	26997.6	27706.6	49950.3	26725.5
474	sp|P62912|RL32_RAT	60S ribosomal protein L32 OS=Rattus norvegicus OX=10116 GN=Rpl32 PE=1 SV=2	46980.1	39517.6	33156.4	21767.4	18433	36860.5	36450.4	38524.4	40536.1	34110.1	17186.5	27769.6
475	tr|F1LMV6|F1LMV6_RAT	Desmoplakin OS=Rattus norvegicus OX=10116 GN=Dsp PE=1 SV=1	42972.1	26368.8	22508.4	28986.9	15739.9	23322.6	18758.6	12584.3	24919.7	20247.6	17435.9	15863.4
476	sp|P00762|TRY1_RAT	Anionic trypsin-1 OS=Rattus norvegicus OX=10116 GN=Prss1 PE=1 SV=1	1.12803e+06	1.18296e+06	1.10374e+06	887294	1.33574e+06	541192	680351	894820	1.01264e+06	925847	695819	647681
477	sp|Q4KLZ6|TKFC_RAT	Triokinase/FMN cyclase OS=Rattus norvegicus OX=10116 GN=Tkfc PE=1 SV=1	52767	22972	36018.9	21057.7	10274.8	17285.5	20414.1	28502.8	11904.2	17742.5	11313.2	5492.24
478	tr|Q5M9H2|Q5M9H2_RAT	Acyl-Coenzyme A dehydrogenase, very long chain OS=Rattus norvegicus OX=10116 GN=Acadvl PE=1 SV=1	19686.7	19832.9	29190	17178.9	20406.7	16460.5	8689.58	12049.9	14848.8	12156	16091.9	19407.4
479	tr|Q6PDW4|Q6PDW4_RAT	Proteasome subunit beta OS=Rattus norvegicus OX=10116 GN=Psmb1 PE=1 SV=1	40599	31448.9	20578.8	32164.4	30759.1	41583.4	36887	47575.5	43516.4	26696.4	18248	29355.1
480	sp|P58775|TPM2_RAT	Tropomyosin beta chain OS=Rattus norvegicus OX=10116 GN=Tpm2 PE=1 SV=1	28010.4	40972.2	57054	29903.3	68096.4	48237.5	48987.1	36729.5	47556.3	51143.6	58835.8	101431
481	sp|P11232|THIO_RAT	Thioredoxin OS=Rattus norvegicus OX=10116 GN=Txn PE=1 SV=2	126661	105171	123982	116260	102549	126278	119107	137945	135063	110282	101784	102422
482	tr|G3V7J0|G3V7J0_RAT	Aldehyde dehydrogenase family 6, subfamily A1, isoform CRA_b OS=Rattus norvegicus OX=10116 GN=Aldh6a1 PE=1 SV=1	33087	28882.3	27871.5	19892.4	33860.8	26763.8	24453.2	28774.7	35993.7	24552.1	15757.9	31004
483	sp|B5DF91|ELAV1_RAT	ELAV-like protein 1 OS=Rattus norvegicus OX=10116 GN=Elavl1 PE=1 SV=1	25723	21000.6	24690.5	23360.1	26819.8	18883.2	21301.5	26278.2	22274.5	18100.8	27127.5	24724.1
484	sp|P61354|RL27_RAT	60S ribosomal protein L27 OS=Rattus norvegicus OX=10116 GN=Rpl27 PE=2 SV=2	151838	140948	118729	116537	92534.2	154159	125784	155751	160128	131002	45657.5	97781.6
485	tr|M0RD20|M0RD20_RAT	Calcium-activated neutral proteinase small subunit OS=Rattus norvegicus OX=10116 GN=Capns1 PE=1 SV=1	26103.2	21999.7	26364.5	25092.8	20125.8	22874.9	24123.7	31748.4	22808.1	20184.5	24360.4	21617.2
486	tr|F1LSW7|F1LSW7_RAT	60S ribosomal protein L14 OS=Rattus norvegicus OX=10116 GN=Rpl14 PE=1 SV=2	43870.6	61092.3	53596.4	51321.4	47463.3	78764.5	48366	49250.2	55638.1	37705.1	29357.5	35455.3
487	tr|A0A0G2JSQ4|A0A0G2JSQ4_RAT	Tropomyosin 1, alpha, isoform CRA_p OS=Rattus norvegicus OX=10116 GN=Tpm1 PE=1 SV=1	131899	208353	194531	224934	348560	118330	167200	158968	196627	193990	375940	257878
488	sp|P62832|RL23_RAT	60S ribosomal protein L23 OS=Rattus norvegicus OX=10116 GN=Rpl23 PE=2 SV=1	50028.5	48363.8	53454.4	52164.1	42799.4	54753.2	54351.4	69871.5	53788.3	46800.5	45607.2	35874.2
489	tr|M0RAM5|M0RAM5_RAT	Glutathione peroxidase OS=Rattus norvegicus OX=10116 GN=Gpx1 PE=1 SV=1	35415.7	17472.6	29432.9	53400.8	72480.8	43295.4	34237.9	13407.4	21745.8	16555.3	41778.1	33248.9
490	sp|Q66H80|COPD_RAT	Coatomer subunit delta OS=Rattus norvegicus OX=10116 GN=Arcn1 PE=2 SV=1	45442.5	34010.2	45015.5	33066.6	29193.9	37962.4	8887.28	29930.6	42305.9	31055.2	14410.3	23643.3
491	sp|P43278|H10_RAT	Histone H1.0 OS=Rattus norvegicus OX=10116 GN=H1-0 PE=2 SV=2	32448.6	24905.3	34624	17309.4	31785.5	46041.1	18894.8	25510.6	26700.5	30618.4	18068.4	34167.8
492	tr|D3ZHD1|D3ZHD1_RAT	Annexin OS=Rattus norvegicus OX=10116 GN=Anxa13 PE=1 SV=1	13208	21094.9	19908.9	17785.5	8252.81	10999.5	15798.3	19579.1	17250.9	15712.2	11888.3	6666.21
493	tr|B2RYS2|B2RYS2_RAT	Cytochrome b-c1 complex subunit 7 OS=Rattus norvegicus OX=10116 GN=Uqcrb PE=1 SV=1	71491.2	63142.8	85923.6	70179.5	60675.2	50642.1	83030.9	92632.7	95464.6	79408.2	95661.6	77852.4
494	tr|D3ZFA8|D3ZFA8_RAT	40S ribosomal protein S17 OS=Rattus norvegicus OX=10116 GN=LOC100362366 PE=3 SV=1	38592.5	29361.5	27531.7	45482.9	36384.3	23814.2	20662.6	22836.1	20984.5	22615.3	30388.9	23360.3
495	tr|Q6PDV6|Q6PDV6_RAT	40S ribosomal protein S14 OS=Rattus norvegicus OX=10116 GN=LOC100911847 PE=1 SV=1	92878.8	71580.2	73132.8	80848.3	63156.9	85613.5	69608.9	72928.5	85674.3	84347.1	44798.1	59523.5
496	sp|P04905|GSTM1_RAT	Glutathione S-transferase Mu 1 OS=Rattus norvegicus OX=10116 GN=Gstm1 PE=1 SV=2	24684.9	26538.4	21961.9	31086.7	28478.5	24325.4	27726.1	29773.4	30083.8	18566	24438.4	26646.3
497	sp|P17220|PSA2_RAT	Proteasome subunit alpha type-2 OS=Rattus norvegicus OX=10116 GN=Psma2 PE=1 SV=3	35575.4	33594.7	13852	37588.8	22285.8	16421.8	6159.15	11793.8	1455.23	1338.28	9663.12	3560.31
498	sp|P80254|DOPD_RAT	D-dopachrome decarboxylase OS=Rattus norvegicus OX=10116 GN=Ddt PE=1 SV=3	66635.2	87975.5	73785.6	103782	107858	57680.7	30613.2	86610.3	64856	55340.6	92951.4	65331.6
499	sp|P16446|PIPNA_RAT	Phosphatidylinositol transfer protein alpha isoform OS=Rattus norvegicus OX=10116 GN=Pitpna PE=1 SV=2	52016.4	42245	63149.5	51100.4	39163.5	48229.8	34656.9	49684.4	43806.1	33489.3	29204.4	30482.3
500	sp|P84817|FIS1_RAT	Mitochondrial fission 1 protein OS=Rattus norvegicus OX=10116 GN=Fis1 PE=1 SV=1	15940.6	8512.57	9855.88	16155.6	6351.23	7687.81	5775.36	8209.77	5645.21	5234.82	6773.13	5777.37
501	sp|P14423|PA2GA_RAT	Phospholipase A2, membrane associated OS=Rattus norvegicus OX=10116 GN=Pla2g2a PE=1 SV=2	59135.7	51737.3	32480.2	26690.5	37596.8	62016	47830.3	59218.5	72550.1	68427.7	22114.9	61476
502	sp|P69897|TBB5_RAT	Tubulin beta-5 chain OS=Rattus norvegicus OX=10116 GN=Tubb5 PE=1 SV=1	99419.5	87111.5	73896.9	88957.2	117596	65292.6	67238.2	70784.2	63232.1	73320.5	149391	116932
503	tr|D4A0T0|D4A0T0_RAT	Complex I-PDSW OS=Rattus norvegicus OX=10116 GN=Ndufb10 PE=1 SV=1	21031.8	21919.5	25017.1	24044	18319.1	14695.1	15014.7	19967.4	22375.7	20774.9	23295.5	21949.7
504	sp|Q5XIE0|AN32E_RAT	Acidic leucine-rich nuclear phosphoprotein 32 family member E OS=Rattus norvegicus OX=10116 GN=Anp32e PE=2 SV=1	31243.3	33738	27791.4	50511.3	42269.8	23981.2	10647.8	12602	18804.1	13397.8	39179.3	21446.5
505	sp|P19234|NDUV2_RAT	NADH dehydrogenase [ubiquinone] flavoprotein 2, mitochondrial OS=Rattus norvegicus OX=10116 GN=Ndufv2 PE=1 SV=2	55829.9	27800.4	69744.5	69012.1	65887.9	51548.3	13428.6	13480.2	9421.67	11263.9	18272.9	46248
506	tr|D3ZSL2|D3ZSL2_RAT	ABRA C-terminal-like OS=Rattus norvegicus OX=10116 GN=Abracl PE=1 SV=1	30696.8	29095.6	21245.8	34718.1	29649.8	23651.4	23766.1	28009.7	21731.5	13789.4	31426	18411.8
507	tr|B0BNJ4|B0BNJ4_RAT	ETHE1, persulfide dioxygenase OS=Rattus norvegicus OX=10116 GN=Ethe1 PE=1 SV=1	69506.6	56736.2	76057.1	65990.4	46495.2	53310	54622.1	68496.4	60204.2	52325.2	58611.3	34966.9
508	sp|Q9JJW3|ATPMD_RAT	ATP synthase membrane subunit DAPIT, mitochondrial OS=Rattus norvegicus OX=10116 GN=Atp5md PE=1 SV=1	24539.9	21699.6	22819	18559.2	9822.57	25098.7	21987.3	22142.8	26189	20006.9	17028.5	18386.9
509	sp|Q4KLF8|ARPC5_RAT	Actin-related protein 2/3 complex subunit 5 OS=Rattus norvegicus OX=10116 GN=Arpc5 PE=1 SV=3	44319.7	40666.9	32354.2	52699	53003.4	35071.1	48931.9	57610.5	35451.5	37960.3	68225.6	45034.1
510	sp|P01836|KACA_RAT	Ig kappa chain C region, A allele OS=Rattus norvegicus OX=10116 PE=1 SV=1	69509.6	56251.7	55503	50790	49142.2	81756.4	51397.2	36202.9	46683.9	58387.9	41098.9	50624.9
511	sp|P40307|PSB2_RAT	Proteasome subunit beta type-2 OS=Rattus norvegicus OX=10116 GN=Psmb2 PE=1 SV=1	6742.91	7442.37	5885.68	5780.04	2426.29	5626.43	2071.9	7321.39	9469.21	1946.49	4342.76	2551.96
512	sp|P18422|PSA3_RAT	Proteasome subunit alpha type-3 OS=Rattus norvegicus OX=10116 GN=Psma3 PE=1 SV=3	58072.7	49018.7	40618.9	46949.8	43632	47132.5	40255.4	57537.3	55625.6	36533.9	49587.3	39485.9
513	sp|P25409|ALAT1_RAT	Alanine aminotransferase 1 OS=Rattus norvegicus OX=10116 GN=Gpt PE=1 SV=2	46218.3	18438.2	41474.4	31687.3	12539.3	29170.6	17710.9	51442.3	40288.8	18446.9	7752.94	8450.49
514	tr|F1LPB3|F1LPB3_RAT	Long-chain-fatty-acid--CoA ligase 5 OS=Rattus norvegicus OX=10116 GN=Acsl5 PE=1 SV=3	33441	18978.2	29530.7	13864	7802.82	14724.9	13422.7	18412.4	20599.9	10049.2	6266.86	3497.45
515	tr|Q642E2|Q642E2_RAT	60S ribosomal protein L28 OS=Rattus norvegicus OX=10116 GN=Rpl28 PE=2 SV=1	15410.5	15236.9	15892	14513.8	11530.6	15456.7	29933.6	39729.5	38586.7	26440.3	16150.1	20522.5
516	sp|O35142|COPB2_RAT	Coatomer subunit beta' OS=Rattus norvegicus OX=10116 GN=Copb2 PE=1 SV=3	22355.6	21732.3	18941.4	14035.7	13282.6	23407.9	13384.3	22670.1	20879.7	17967.9	4637.19	17379.3
517	tr|F1MAN8|F1MAN8_RAT	Laminin subunit alpha 5 OS=Rattus norvegicus OX=10116 GN=Lama5 PE=1 SV=2	9777.42	17506.9	17261.7	2870.34	14482.2	18083.6	9588.37	15582.8	9282.86	12452	4758.92	17401.8
518	sp|P36972|APT_RAT	Adenine phosphoribosyltransferase OS=Rattus norvegicus OX=10116 GN=Aprt PE=1 SV=1	6791.6	21760.2	8874.98	28094.8	24723.3	915.313	0	185.173	162.639	172.89	680.039	0
519	tr|A0A0G2K7W6|A0A0G2K7W6_RAT	60S ribosomal protein L27a OS=Rattus norvegicus OX=10116 GN=RGD1562402 PE=3 SV=1	69055.8	68923.3	51788.9	34546	33739.4	60871	51170.1	49983.7	59274.2	57782.1	18400.9	33945.6
520	tr|D3ZAN3|D3ZAN3_RAT	Alpha glucosidase 2 alpha neutral subunit (Predicted) OS=Rattus norvegicus OX=10116 GN=Ganab PE=1 SV=1	22675.7	22347.2	26289.4	16001.9	15289.2	25768.9	16033.6	21488.2	21032.4	19354.2	8221.26	16788.4
521	tr|G3V762|G3V762_RAT	GDP-4-keto-6-deoxy-D-mannose-3,5-epimerase-4-reductase OS=Rattus norvegicus OX=10116 GN=Tsta3 PE=1 SV=1	47958.4	42718.4	49616.9	53909.5	38093.8	35700.7	29307.7	41786.8	40792.9	22979.3	30611	23685.5
522	tr|Q5VLR5|Q5VLR5_RAT	BWK4 OS=Rattus norvegicus OX=10116 GN=Erp44 PE=1 SV=1	30663.3	26094.3	22530	36289.2	33913.8	31693.5	19510.5	23542.2	32378.5	21830	28724.6	22256.1
523	tr|G3V796|G3V796_RAT	Medium-chain specific acyl-CoA dehydrogenase, mitochondrial OS=Rattus norvegicus OX=10116 GN=Acadm PE=1 SV=1	32362	20287.4	27538.4	21273.4	13839.6	20218.9	24986.5	32023.8	22518.2	15954.7	10652.5	15326.2
524	sp|P21670|PSA4_RAT	Proteasome subunit alpha type-4 OS=Rattus norvegicus OX=10116 GN=Psma4 PE=1 SV=1	33391.7	29967.5	30350.9	29033	25205.6	26336.2	1805.11	1325.43	17768.2	13292.4	11109.5	13671
525	sp|Q6AY09|HNRH2_RAT	Heterogeneous nuclear ribonucleoprotein H2 OS=Rattus norvegicus OX=10116 GN=Hnrnph2 PE=1 SV=1	23402	22835.4	22103.7	22264.9	25064.6	23576.6	16416	14277.4	16428.4	12121.6	14395.8	16868.8
526	sp|Q6P7Q4|LGUL_RAT	Lactoylglutathione lyase OS=Rattus norvegicus OX=10116 GN=Glo1 PE=1 SV=3	36171.9	48744.4	36646.1	51269.6	48505.9	29334.4	14629.4	20202.2	26561.7	11079.6	32946.1	38140.5
527	tr|Q6IRJ7|Q6IRJ7_RAT	Annexin OS=Rattus norvegicus OX=10116 GN=Anxa7 PE=1 SV=1	13002.6	5257.19	15853.8	12204.3	14123.5	5178.27	11626.7	17354.4	7925.13	6566.35	12600.6	11560.5
528	tr|F1LMC7|F1LMC7_RAT	Septin-7 OS=Rattus norvegicus OX=10116 GN=Sept7 PE=1 SV=3	25206.8	37008.1	33583.4	17974.6	24470.5	17910.6	15949.1	20592	21436.9	19038.9	13081.8	19234.6
529	sp|P26453|BASI_RAT	Basigin OS=Rattus norvegicus OX=10116 GN=Bsg PE=1 SV=2	20985.8	18106.7	21937.5	20797.9	19288.9	19667.7	15796.9	12606.6	23465.3	16899	24391.3	19327.3
530	sp|P24090|FETUA_RAT	Alpha-2-HS-glycoprotein OS=Rattus norvegicus OX=10116 GN=Ahsg PE=1 SV=2	20701.3	21475.3	16180.4	33397.9	16453.3	12612.1	16593.5	12601.6	10457.6	8967.39	13817.4	8706.09
531	tr|B5DF46|B5DF46_RAT	Phosphomannomutase OS=Rattus norvegicus OX=10116 GN=Pmm2 PE=1 SV=1	13727.4	12273.1	14470.8	17151.7	6369.56	12450.4	14405.5	23575.9	17053.4	10120.5	13638.8	8921.49
532	sp|Q9Z1N1|F16P2_RAT	Fructose-1,6-bisphosphatase isozyme 2 OS=Rattus norvegicus OX=10116 GN=Fbp2 PE=1 SV=1	13811.9	11118.8	19255.3	10646	2791.45	12720.1	1931.24	1563.26	3968.24	3246.18	3018.51	2834.47
533	tr|A0A0H2UHE1|A0A0H2UHE1_RAT	Succinate--CoA ligase [ADP/GDP-forming] subunit alpha, mitochondrial OS=Rattus norvegicus OX=10116 GN=Suclg1 PE=1 SV=1	24951.8	22426.8	21369.1	22364.3	20293.8	20335.1	22548.7	26367.2	24181.7	22420.1	12890.2	18370.8
534	tr|B0BNK1|B0BNK1_RAT	RAB5C, member RAS oncogene family OS=Rattus norvegicus OX=10116 GN=Rab5c PE=1 SV=1	50487.5	50651.8	46793.7	36114.9	35017.7	54490.5	46161.2	55016.5	53459	49858.7	19678.1	36908.5
535	sp|P38718|MPC2_RAT	Mitochondrial pyruvate carrier 2 OS=Rattus norvegicus OX=10116 GN=Mpc2 PE=2 SV=1	8375.89	5570.16	7306.46	4428.51	5081.47	8791.5	5746.59	5156.49	9644.94	5319.86	3203.17	6927.59
536	tr|F2Z3T9|F2Z3T9_RAT	U2 snRNP auxiliary factor large subunit OS=Rattus norvegicus OX=10116 GN=U2af2 PE=1 SV=2	34240	36540.4	29887	38169.7	35234.9	20026.4	23251.2	35610.6	37545.7	36861.3	32529.9	29573
537	sp|P14604|ECHM_RAT	Enoyl-CoA hydratase, mitochondrial OS=Rattus norvegicus OX=10116 GN=Echs1 PE=1 SV=1	18148.6	14848	13181.9	12541.2	5961.31	7106.98	14917.4	19968.3	14995.4	4839.84	12256.3	12635.8
538	tr|G3V9E3|G3V9E3_RAT	Caldesmon 1, isoform CRA_b OS=Rattus norvegicus OX=10116 GN=Cald1 PE=1 SV=1	27065.7	22429.4	39244.2	32166.9	30607.9	22629.3	27808.6	30011.4	20401.4	31909.5	32178.4	31868.5
539	sp|O08699|PGDH_RAT	15-hydroxyprostaglandin dehydrogenase [NAD(+)] OS=Rattus norvegicus OX=10116 GN=Hpgd PE=2 SV=2	31224.1	16294.8	34624	25100.5	11917.8	22498.4	18940	39030.7	26520.5	15316	16616.5	8409.87
540	tr|Q62669|Q62669_RAT	Globin a1 OS=Rattus norvegicus OX=10116 GN=LOC103694855 PE=1 SV=1	54533.1	91808.5	32059.2	97321.7	85984.3	25995.4	26542.1	59753.7	60819.6	38634.8	76805.6	28048.1
541	sp|Q5PPN5|TPPP3_RAT	Tubulin polymerization-promoting protein family member 3 OS=Rattus norvegicus OX=10116 GN=Tppp3 PE=2 SV=1	7504.35	11167.8	8687.64	7185.49	14463.6	7007.96	2667.51	406.218	5198.73	9383.64	6699.61	3953.62
542	tr|G3V913|G3V913_RAT	Heat shock 27 kDa protein OS=Rattus norvegicus OX=10116 GN=Hspb1 PE=1 SV=1	77015.5	115111	129168	94134.3	162827	99814.7	89586.6	111596	91641.7	118626	125194	129376
543	sp|P07151|B2MG_RAT	Beta-2-microglobulin OS=Rattus norvegicus OX=10116 GN=B2m PE=1 SV=1	55264.1	43522.2	57903.2	54243.4	43917.7	62111.3	26668.3	35472.9	41306.3	41609.7	27844.4	39574.6
544	tr|Q5EBB0|Q5EBB0_RAT	Similar to 14-3-3 protein sigma OS=Rattus norvegicus OX=10116 GN=LOC298795 PE=2 SV=1	36578	20487.7	22950.9	39684.3	12343.6	12479.9	13830.9	20038.9	8015.31	8503.33	12038.6	5504.64
545	tr|D4AD70|D4AD70_RAT	60S ribosomal protein L38 OS=Rattus norvegicus OX=10116 PE=3 SV=1	27254.3	31127.1	13429.8	45981.3	39853.6	9636.15	27320.6	40854.2	33913.3	22278	20578.2	21329.7
546	sp|P40112|PSB3_RAT	Proteasome subunit beta type-3 OS=Rattus norvegicus OX=10116 GN=Psmb3 PE=1 SV=1	34923.1	25878.6	30298.2	31007.1	24309.2	30032.9	20046	23322.5	16922.5	23415.5	10901.1	15821.9
547	sp|Q5BK63|NDUA9_RAT	NADH dehydrogenase [ubiquinone] 1 alpha subcomplex subunit 9, mitochondrial OS=Rattus norvegicus OX=10116 GN=Ndufa9 PE=1 SV=2	45406.1	37225.5	53524.4	44491.7	38752.5	42677.8	50501.9	52507.7	59093.8	55731	30426.4	42219.5
548	sp|Q62952|DPYL3_RAT	Dihydropyrimidinase-related protein 3 OS=Rattus norvegicus OX=10116 GN=Dpysl3 PE=1 SV=2	66059.7	80085.8	69878	69839.4	84110.9	77224.3	65692.4	68719.4	78389.8	84932.6	38819.6	71990.6
549	tr|D3ZLC1|D3ZLC1_RAT	Lamin B2 OS=Rattus norvegicus OX=10116 GN=Lmnb2 PE=1 SV=2	4029.06	3065.03	625.064	2754.68	4543.72	3930.49	1342.53	1757.49	369.92	3258.26	3201.13	2758.26
550	sp|Q9QVC8|FKBP4_RAT	Peptidyl-prolyl cis-trans isomerase FKBP4 OS=Rattus norvegicus OX=10116 GN=Fkbp4 PE=1 SV=3	5462.16	3714.29	4164.99	3257.63	2009.97	5758.21	6407.49	6772.68	4802.86	3659.69	1364.59	4745.42
551	tr|Q7TQ70|Q7TQ70_RAT	Fibrinogen alpha chain OS=Rattus norvegicus OX=10116 GN=Fga PE=1 SV=1	26019	35372.7	36848.1	14492.1	41891.8	35617.3	11691	24158.7	21871.5	26001.6	41212.9	35308.8
552	tr|M0R9L0|M0R9L0_RAT	Nascent polypeptide-associated complex subunit alpha OS=Rattus norvegicus OX=10116 GN=Naca PE=1 SV=1	14062.6	9897.32	12050.9	11175.3	3555.12	12937.2	6503.1	10641.6	7991.36	9089.88	3186.89	7094.42
553	tr|A0A0G2JUD2|A0A0G2JUD2_RAT	Inorganic diphosphatase OS=Rattus norvegicus OX=10116 GN=Sar1a PE=1 SV=1	14369.7	20608.5	21125.7	12584.4	14437	14447.3	13514.5	21433.1	16335	12876.5	7630.29	10682
554	tr|Q68G41|Q68G41_RAT	Dodecenoyl-Coenzyme A delta isomerase (3,2 trans-enoyl-Coenzyme A isomerase) OS=Rattus norvegicus OX=10116 GN=Eci1 PE=1 SV=1	14004.3	16128.3	22172.1	12540.1	15031.5	16671.2	12411.5	13121.1	14803.7	16575.8	7785.93	16661.5
555	tr|D3ZFY8|D3ZFY8_RAT	Ubiquitin-conjugating enzyme E2 variant 1-like OS=Rattus norvegicus OX=10116 GN=LOC100912618 PE=1 SV=1	27514.6	29046.8	23401.6	35381.1	34396.1	18290.2	30813.2	30015.3	27456.8	23656.3	34468.1	25958.9
556	tr|D3ZZ95|D3ZZ95_RAT	60S ribosomal protein L36 OS=Rattus norvegicus OX=10116 PE=3 SV=1	58497.8	56129.4	55185.8	39016.9	32064.6	49716.4	43923.2	38036.1	58722.2	45937.5	18730	41301.2
557	tr|Q4FZZ3|Q4FZZ3_RAT	Glutathione transferase OS=Rattus norvegicus OX=10116 GN=Gsta5 PE=2 SV=1	26408.3	27330.9	30692.1	23433.3	21253.6	23275.9	24087.9	35862.9	30511.2	21454.7	25065.1	17856.7
558	tr|G3V7I0|G3V7I0_RAT	Peroxiredoxin 3 OS=Rattus norvegicus OX=10116 GN=Prdx3 PE=1 SV=1	82061.9	82866.1	75487.7	54283	44565.3	75141	69816.2	82514.3	78160.6	79168.5	22352.6	62038.9
559	tr|B0BMW0|B0BMW0_RAT	Ras-related protein Rab-14 OS=Rattus norvegicus OX=10116 GN=Rab14 PE=1 SV=1	21097.2	32302.1	36114.4	14327	23167.3	38490.2	15104.5	25570.2	20041.5	28586.5	7197.88	14530.3
560	sp|P56571|ES1_RAT	ES1 protein homolog, mitochondrial OS=Rattus norvegicus OX=10116 PE=1 SV=2	37512.9	34486	33172	33982.3	38297.6	29379.4	23608.5	25956.4	19015.3	15144.2	23127.9	38346
561	tr|Q66WT9|Q66WT9_RAT	Clathrin-assembly lymphoid myeloid leukemia protein OS=Rattus norvegicus OX=10116 GN=Picalm PE=1 SV=1	6240.69	7612.15	4725.64	6707.64	5933.62	6498.95	276.168	525.561	169.434	348.045	3114.51	3767.38
562	sp|P11517|HBB2_RAT	Hemoglobin subunit beta-2 OS=Rattus norvegicus OX=10116 PE=1 SV=2	57237.1	122560	56861.8	112990	192666	69284.3	66578.3	67876	75928.3	90527	93706.1	74203.9
563	sp|P62959|HINT1_RAT	Histidine triad nucleotide-binding protein 1 OS=Rattus norvegicus OX=10116 GN=Hint1 PE=1 SV=5	52679.3	47185.1	40787.4	59928	42282.8	33612.8	35055	37404.8	33154.8	26461	57567.6	36502.4
564	tr|D4A771|D4A771_RAT	60S ribosomal protein L35a OS=Rattus norvegicus OX=10116 PE=3 SV=1	29476.4	21159.8	20901.3	21242.3	20381.8	26813.1	39591.5	45755.4	44232.4	30289.1	16797.3	22663.8
565	tr|F1LTW8|F1LTW8_RAT	40S ribosomal protein S23 OS=Rattus norvegicus OX=10116 PE=3 SV=2	42024.2	41271.4	43036.8	24178.4	25942	51663.2	33043.4	29554.3	35168.2	36101.5	9169.77	35876.4
566	tr|Q5XIH3|Q5XIH3_RAT	NADH dehydrogenase [ubiquinone] flavoprotein 1, mitochondrial OS=Rattus norvegicus OX=10116 GN=Ndufv1 PE=1 SV=1	23748.9	28372.2	25981	18123.6	21313.9	17928.9	18184.1	21193.9	22369.2	27938.4	13983.4	21634.7
567	tr|D3Z8D7|D3Z8D7_RAT	40S ribosomal protein S26 OS=Rattus norvegicus OX=10116 GN=LOC100361854 PE=3 SV=1	78400.9	79032.8	91864.3	74874	59249.2	96862.3	82373.4	91782.1	85792.4	62415.9	52038.6	60556.9
568	sp|Q4FZY0|EFHD2_RAT	EF-hand domain-containing protein D2 OS=Rattus norvegicus OX=10116 GN=Efhd2 PE=1 SV=1	58668.5	56163.7	69085.5	74736	56389.2	58594.4	29533.9	56151.7	56990.8	27878	65303.5	37259.7
569	sp|P23457|DIDH_RAT	3-alpha-hydroxysteroid dehydrogenase OS=Rattus norvegicus OX=10116 GN=Akr1c9 PE=1 SV=1	26226.9	16931	33834.5	17827.9	7104.77	19972.8	6429.07	11720.7	11270.6	8508.63	3427.06	5884.05
570	sp|B2GV06|SCOT1_RAT	Succinyl-CoA:3-ketoacid coenzyme A transferase 1, mitochondrial OS=Rattus norvegicus OX=10116 GN=Oxct1 PE=1 SV=1	12497.9	10221	14038.1	10353	10236.6	10743	5825.09	14908.9	9840.05	10466.7	4843.68	8884.96
571	sp|P11348|DHPR_RAT	Dihydropteridine reductase OS=Rattus norvegicus OX=10116 GN=Qdpr PE=1 SV=1	8014.79	7833.92	8980.11	11179.1	9320.85	5131.51	1054.7	7549.48	10210.6	7667.37	3210.94	5539.76
572	tr|G3V6P8|G3V6P8_RAT	Guanine nucleotide-binding protein subunit gamma OS=Rattus norvegicus OX=10116 GN=Gng12 PE=1 SV=1	41366.4	41166.1	71495	59086.2	70618.7	51729.5	40808.3	46762.9	49794.3	35774.7	60625.3	52665
573	sp|P08461|ODP2_RAT	Dihydrolipoyllysine-residue acetyltransferase component of pyruvate dehydrogenase complex, mitochondrial OS=Rattus norvegicus OX=10116 GN=Dlat PE=1 SV=3	60136	48518	61900	43878.2	42463.3	55427.8	35461.8	47054.4	34821.9	37678.9	25000.6	46998
574	tr|Q6T5F2|Q6T5F2_RAT	UDP-glucuronosyltransferase OS=Rattus norvegicus OX=10116 GN=Ugt1a2 PE=2 SV=1	61804.9	26494.7	38668.5	35932	13182.6	32318.5	33521.3	51991.1	38896.4	28827	20785	9271.08
575	tr|G3V9Z3|G3V9Z3_RAT	Amine oxidase OS=Rattus norvegicus OX=10116 GN=Maoa PE=1 SV=1	53398	51063.6	52573.1	23904.6	41908.4	39534.2	41202.4	33253.9	43712.9	54847.5	15757.4	33781.4
576	tr|G3V9W6|G3V9W6_RAT	Aldehyde dehydrogenase OS=Rattus norvegicus OX=10116 GN=Aldh3a2 PE=1 SV=1	19811.4	14137.4	16149.5	13940.7	13824.1	13975.1	13419	10870.6	15295	8412.17	10000.9	9288.77
577	tr|Q6P7Q6|Q6P7Q6_RAT	Galectin OS=Rattus norvegicus OX=10116 GN=Lgals9 PE=1 SV=1	14063.6	21244.5	17524.8	10634.9	10595.5	9773.66	10373.7	14206.7	16023.2	16492.2	2899.37	12148.3
578	sp|Q9Z270|VAPA_RAT	Vesicle-associated membrane protein-associated protein A OS=Rattus norvegicus OX=10116 GN=Vapa PE=1 SV=3	12460.7	13090.4	15268.8	9534	7860.37	11974.4	10598.7	15316.4	16249	6584.32	23387.7	8014.14
579	tr|B0BN81|B0BN81_RAT	40S ribosomal protein S5 OS=Rattus norvegicus OX=10116 GN=Rps5 PE=1 SV=1	64225.4	74639.6	67075.1	84318.5	82673	65665.4	1253.88	7387.89	10364.1	7824.08	18068.6	1612.88
580	tr|M0RD75|M0RD75_RAT	40S ribosomal protein S6 OS=Rattus norvegicus OX=10116 GN=Rps6 PE=1 SV=1	158449	151330	133707	100523	83169.4	36843.7	153764	29192.6	150268	35743.3	49933.4	104893
581	tr|Q68FY4|Q68FY4_RAT	Gc-globulin OS=Rattus norvegicus OX=10116 GN=Gc PE=1 SV=1	24149.6	25734.6	32913.8	32955.8	27232.8	17318.8	27909.8	12554.1	32775.4	28943	13958	11063.4
582	tr|Q0ZFS8|Q0ZFS8_RAT	RCG61099, isoform CRA_c OS=Rattus norvegicus OX=10116 GN=Srsf3 PE=1 SV=1	16599.2	33705.5	20273.1	12062	28878.6	14956.2	31751.6	23289.1	49743	14415.2	12831.7	22244.5
583	tr|G3V7Y3|G3V7Y3_RAT	ATP synthase F1 subunit delta OS=Rattus norvegicus OX=10116 GN=Atp5f1d PE=1 SV=1	83233.5	62471.4	97871.3	83297.5	63518.4	61749.7	69563.9	98904.3	69637.9	68498.8	82103.3	78625.6
584	tr|M0R961|M0R961_RAT	Far upstream element-binding protein 2 OS=Rattus norvegicus OX=10116 GN=Khsrp PE=1 SV=1	22295.7	16996.5	20680	32886.1	27323.1	19783.1	19117.6	16785	24249.6	19209.6	27898.6	22350.3
585	sp|P07895|SODM_RAT	Superoxide dismutase [Mn], mitochondrial OS=Rattus norvegicus OX=10116 GN=Sod2 PE=1 SV=2	20141	21470.8	22277.5	22731.1	22653.4	14134.4	18987	18854.7	20054.2	19302.4	20300.8	17392.4
586	tr|A0A0G2JY70|A0A0G2JY70_RAT	40S ribosomal protein S20 OS=Rattus norvegicus OX=10116 PE=1 SV=1	22883.8	22256	24721.8	28424.3	24986.1	26309.7	28092	30675.4	24785.1	22554.4	25814.9	21376.6
587	tr|A0A1W2Q6F8|A0A1W2Q6F8_RAT	NADH dehydrogenase [ubiquinone] 1 alpha subcomplex subunit 10, mitochondrial OS=Rattus norvegicus OX=10116 GN=Ndufa10l1 PE=3 SV=1	26560	23653.9	24946.2	29876.3	25868.1	14242	18753	28329.7	24690.7	26976.6	21778.6	28339.5
588	tr|F1LPR6|F1LPR6_RAT	Immunoglobulin heavy constant mu OS=Rattus norvegicus OX=10116 PE=1 SV=3	19208.5	15656.4	5688.19	17636.6	9547.37	19871.3	4529.35	4652.47	5637.72	3338.96	3807.71	4302.59
589	sp|Q4KM35|PSB10_RAT	Proteasome subunit beta type-10 OS=Rattus norvegicus OX=10116 GN=Psmb10 PE=2 SV=1	33745.3	30107	33483.9	33686.1	33081.3	35793.9	25693.8	27778.2	20102.7	16772.5	22002.6	19746.6
590	tr|Q99JC6|Q99JC6_RAT	TAP-binding protein OS=Rattus norvegicus OX=10116 GN=Tapbp PE=1 SV=1	5548.13	4551.3	4814.62	3552.17	3151.55	4395.17	123.183	176.502	152.306	149.293	129.849	191.471
591	tr|F1LT35|F1LT35_RAT	Similar to 60S ribosomal protein L23a OS=Rattus norvegicus OX=10116 GN=RGD1564606 PE=3 SV=1	14088.6	88761.6	17461.3	70451.9	55809.4	135170	23234.4	20831.2	100532	20432.4	46038.9	27397.3
592	tr|A0A0H2UHZ2|A0A0H2UHZ2_RAT	Nucleosome assembly protein 1-like 4 OS=Rattus norvegicus OX=10116 GN=Nap1l4 PE=1 SV=1	13212.7	15236.1	15730.1	13792.1	11935	12193.1	7550.31	12116.8	13628	12410.1	15398.3	10765.6
593	tr|F1M9V7|F1M9V7_RAT	Aminopeptidase OS=Rattus norvegicus OX=10116 GN=Npepps PE=1 SV=1	19560.9	23100.8	21389.4	16140.7	8789.61	19179.5	14030.9	18841.4	15523.6	14350.1	5640.23	10596
594	tr|D3ZTX4|D3ZTX4_RAT	Maltase-glucoamylase OS=Rattus norvegicus OX=10116 GN=Mgam PE=1 SV=3	48591.8	28873	48584	26780	4743.07	8856.19	1177.97	52244.3	50995.7	19010.9	5354.33	3458.88
595	sp|Q5XI07|LPP_RAT	Lipoma-preferred partner homolog OS=Rattus norvegicus OX=10116 GN=Lpp PE=1 SV=1	31928.2	33667.8	27653.5	28328.1	31886.3	13293	22355.9	17851.1	12409.1	19351.2	22286.9	25011
596	tr|D4ABT8|D4ABT8_RAT	Heterogeneous nuclear ribonucleoprotein U-like 2 OS=Rattus norvegicus OX=10116 GN=Hnrnpul2 PE=1 SV=1	25227	23111	19248.4	18758.6	16158.5	22179.7	7734.95	12319.4	12719.4	12674.7	452.13	9294.9
597	tr|Q66HM7|Q66HM7_RAT	Lupus La protein homolog OS=Rattus norvegicus OX=10116 GN=Ssb PE=1 SV=1	10160.3	14883.2	2253.71	20568.7	16581.2	9127.78	4883.12	5018.53	5764.13	9170.95	14895.6	10530.8
598	sp|P30904|MIF_RAT	Macrophage migration inhibitory factor OS=Rattus norvegicus OX=10116 GN=Mif PE=1 SV=4	143281	162160	91029.5	167268	224667	111703	128803	142041	137330	108729	223230	11950.2
599	sp|D3ZAF6|ATPK_RAT	ATP synthase subunit f, mitochondrial OS=Rattus norvegicus OX=10116 GN=Atp5mf PE=1 SV=1	104942	151654	107523	118021	110759	81321.6	64407.6	47822.6	128013	146599	38109.4	97248.5
600	sp|Q07984|SSRD_RAT	Translocon-associated protein subunit delta OS=Rattus norvegicus OX=10116 GN=Ssr4 PE=2 SV=1	26281.1	14083.1	20174.1	15079.7	11595.3	26487.3	5555.26	10941	21398.8	19766.6	4096.8	17520.8
601	tr|A0A0G2K531|A0A0G2K531_RAT	Glutathione peroxidase OS=Rattus norvegicus OX=10116 GN=Gpx3 PE=1 SV=1	25775.9	49072.8	45440.4	22486.4	47577.4	50157.1	7515.87	12307.9	11975.7	12029.4	2249.29	27820.4
602	tr|A0A0H2UHK2|A0A0H2UHK2_RAT	Membrane-associated progesterone receptor component 1 OS=Rattus norvegicus OX=10116 GN=Pgrmc1 PE=1 SV=1	26715.2	22488.4	24312	12772	12992.2	23217.5	17601.6	19870.8	25357	19613.5	25915.2	16341.9
603	sp|P83868|TEBP_RAT	Prostaglandin E synthase 3 OS=Rattus norvegicus OX=10116 GN=Ptges3 PE=1 SV=2	22750.1	21732.4	22212.5	10101.5	13125.6	16941.1	18566.4	20917.5	17277.5	14838.3	4038.79	17557.9
604	tr|Q6PDW2|Q6PDW2_RAT	60S ribosomal protein L21 OS=Rattus norvegicus OX=10116 GN=Rpl21 PE=2 SV=1	28188.9	25691.2	16404.5	24311.7	12708.2	28511.9	16450.6	21133.8	18030.1	19765.8	7808.67	13796.1
605	tr|A0A0G2K509|A0A0G2K509_RAT	Keratin, type II cytoskeletal 5 OS=Rattus norvegicus OX=10116 GN=Krt5 PE=1 SV=1	6586.6	24076.1	17804.2	18187.6	5488.83	14342.2	160.22	1430.62	10731.5	8940.06	13670.1	7633.88
606	tr|M0R907|M0R907_RAT	Small nuclear ribonucleoprotein Sm D3 OS=Rattus norvegicus OX=10116 GN=Snrpd3 PE=1 SV=1	61824.2	72059	63404.5	90514.8	73976.4	70941.5	16240	56183	64039.5	59380.6	33032.6	61116.4
607	tr|A0A0G2K1T0|A0A0G2K1T0_RAT	Glutaminase OS=Rattus norvegicus OX=10116 GN=Gls PE=1 SV=1	26183.8	16002.2	20328.8	18891.1	9844.18	18513.4	9546.37	26132.5	24120.7	16025.2	13726.8	7298.97
608	tr|Q4V8I6|Q4V8I6_RAT	60S ribosomal protein L11 OS=Rattus norvegicus OX=10116 GN=Rpl11 PE=1 SV=1	64788.4	59083.6	48412.4	54817.5	43166.4	47349.3	48493.4	63439	68491.7	55399.3	29241	37614.7
609	tr|Q4V7D1|Q4V7D1_RAT	Signal sequence receptor subunit alpha OS=Rattus norvegicus OX=10116 GN=Ssr1 PE=1 SV=1	9466.27	18220.7	18035.1	19322.5	12393.1	15319.2	13382.3	7523.46	13351.4	14114.3	6263.64	17520.9
610	sp|P00406|COX2_RAT	Cytochrome c oxidase subunit 2 OS=Rattus norvegicus OX=10116 GN=Mtco2 PE=1 SV=3	229741	183281	225695	200397	98444.1	197658	6214.36	134690	100494	6071.6	1571.23	75661.1
611	tr|A0A0H2UI07|A0A0H2UI07_RAT	Pyruvate kinase OS=Rattus norvegicus OX=10116 GN=Pklr PE=1 SV=1	52839.7	25145.2	66985.9	28513.5	14341.7	46074	33479.2	47925.4	32697.4	19641.1	7029.99	13161.9
612	sp|P27605|HPRT_RAT	Hypoxanthine-guanine phosphoribosyltransferase OS=Rattus norvegicus OX=10116 GN=Hprt1 PE=1 SV=1	15226.2	13857.8	14265.8	15932	19674.2	13804.4	8364.81	12105.2	14196.5	12393.1	19859.6	16889.7
613	tr|Q6PDV8|Q6PDV8_RAT	60S ribosomal protein L22 OS=Rattus norvegicus OX=10116 GN=LOC100360057 PE=1 SV=1	75398.8	69017.4	67823	74574.8	55997.4	78280.7	77888.7	81583.1	85626.2	69799.3	40996.3	46688.7
614	sp|O88656|ARC1B_RAT	Actin-related protein 2/3 complex subunit 1B OS=Rattus norvegicus OX=10116 GN=Arpc1b PE=1 SV=3	4363.08	8958.21	1873.47	4128.16	6652.41	6424.43	5941.44	941.618	4815.34	6173.06	2921.9	6098.33
615	tr|F1M7X5|F1M7X5_RAT	Dipeptidyl peptidase 4 OS=Rattus norvegicus OX=10116 GN=Dpp4 PE=1 SV=2	7860.59	2421.31	9077.4	5516.41	3930.02	5939.27	1950.89	7290.11	7413.56	6026.47	1102.87	2590.88
616	tr|F1M885|F1M885_RAT	Myosin VIIb OS=Rattus norvegicus OX=10116 GN=Myo7b PE=1 SV=2	38840	23557.4	23171.8	37344.9	15675.5	21771.7	23203.2	25627.3	19046	24220.9	30674.8	16092.8
617	sp|P14480|FIBB_RAT	Fibrinogen beta chain OS=Rattus norvegicus OX=10116 GN=Fgb PE=1 SV=4	49356.9	88383.7	92044.6	90098.3	119447	106275	54677.8	94648.6	84796.7	70591.1	90781.2	85792
618	tr|D3ZF13|D3ZF13_RAT	Acyl carrier protein OS=Rattus norvegicus OX=10116 GN=Ndufab1 PE=1 SV=1	17397.5	31759	48409.9	56659.6	51547.3	32981.5	5507.36	9761.05	18036.8	15574.8	22400.9	31577.7
619	sp|Q5XIF3|NDUS4_RAT	NADH dehydrogenase [ubiquinone] iron-sulfur protein 4, mitochondrial OS=Rattus norvegicus OX=10116 GN=Ndufs4 PE=1 SV=1	35593	33853.8	29568.7	40138.9	31719.8	29077.5	24546.2	38252.5	38045.1	40360.4	35972.9	33555.3
620	tr|B1WC26|B1WC26_RAT	N-acetylneuraminate synthase OS=Rattus norvegicus OX=10116 GN=Nans PE=1 SV=1	18058.5	15188.7	17566.9	19913.1	14457.6	18066.9	514.159	2691.58	1563.72	2604.37	5061.91	3541.13
621	sp|A0A0G2K0D3|LMOD1_RAT	Leiomodin-1 OS=Rattus norvegicus OX=10116 GN=Lmod1 PE=1 SV=1	31924.9	45362.4	26533.1	27422.2	38789.4	29863.7	33608.6	47914.1	15646.9	38845.1	13088.7	42176.5
622	sp|P29419|ATP5I_RAT	ATP synthase subunit e, mitochondrial OS=Rattus norvegicus OX=10116 GN=Atp5me PE=1 SV=3	71024.9	34784.9	59292.4	33896	49179.7	58148.7	56422.5	56634	37356.5	42006.4	56392.2	53929.3
623	tr|F1LT36|F1LT36_RAT	Ribosomal protein S10-like 1 OS=Rattus norvegicus OX=10116 GN=Rps10l1 PE=3 SV=2	39852.8	43636.4	12383.4	50088.5	40630.5	13674.9	1227.83	9203.08	7239.8	2407.4	13487.7	8381.27
624	sp|P61972|NTF2_RAT	Nuclear transport factor 2 OS=Rattus norvegicus OX=10116 GN=Nutf2 PE=1 SV=1	11887.3	12648.4	4589.81	11738.8	9105.82	10219.1	1357.32	5093.48	6156.94	4242.48	10116	7761.03
625	tr|A0A0G2JVG3|A0A0G2JVG3_RAT	Pyruvate kinase OS=Rattus norvegicus OX=10116 GN=Pkm PE=1 SV=1	52687.9	52442.4	77513.1	45483.9	36835.2	69798	3760.17	30331.8	35482.3	33957.8	15028.5	36066.4
626	tr|A0A0H2UHM7|A0A0H2UHM7_RAT	Tubulin alpha chain OS=Rattus norvegicus OX=10116 GN=LOC100909441 PE=3 SV=1	43701.5	64037.5	40666	53653	75667	57462.4	41342.1	33261.9	39972.8	46257.5	38845.7	34793.5
627	sp|P80020|FABP6_RAT	Gastrotropin OS=Rattus norvegicus OX=10116 GN=Fabp6 PE=1 SV=3	378203	95193.3	212515	112997	73646.7	113669	6.48573e+06	593148	214519	78220.5	130155	29373.3
628	sp|D4A3K5|H11_RAT	Histone H1.1 OS=Rattus norvegicus OX=10116 GN=H1-1 PE=1 SV=1	61413.1	35876.2	63693.1	57469.2	43264.1	103297	47262	33899.5	34749.3	37607.7	46264.1	37838.4
629	tr|Q4JEI9|Q4JEI9_RAT	Defensin alpha 24 OS=Rattus norvegicus OX=10116 GN=Defa24 PE=3 SV=1	81016	101779	91767	50457.9	112118	185815	81936.5	64279.5	145713	120246	82204.2	142911
630	tr|F7EPE0|F7EPE0_RAT	Prosaposin OS=Rattus norvegicus OX=10116 GN=Psap PE=1 SV=2	38461.7	34387.4	68134.8	46368.1	59951.1	81046.6	64299.7	53286.1	42379	48894.6	89501.4	76350.8
631	tr|D4ACJ1|D4ACJ1_RAT	40S ribosomal protein S24 OS=Rattus norvegicus OX=10116 GN=LOC100363469 PE=3 SV=1	40595.7	42164.8	45493.9	32485.2	24403.6	60863.8	35519.8	33643.9	44594.8	37543.1	16209.7	31161.8
632	tr|D4A4D5|D4A4D5_RAT	Similar to 60S acidic ribosomal protein P2 OS=Rattus norvegicus OX=10116 GN=LOC498555 PE=3 SV=1	11674.8	9693.16	35840.9	19176.8	19920.4	24510	28413.7	27406.4	18884.7	27428.7	28149.8	27141.2
633	sp|Q6B345|S10AB_RAT	Protein S100-A11 OS=Rattus norvegicus OX=10116 GN=S100a11 PE=3 SV=1	33394.3	45748.5	24030.8	44488.1	33945.9	24843.7	16963.3	17128.1	18916.7	14865.6	16720.9	14440.8
634	sp|Q63362|NDUA5_RAT	NADH dehydrogenase [ubiquinone] 1 alpha subcomplex subunit 5 OS=Rattus norvegicus OX=10116 GN=Ndufa5 PE=1 SV=3	17417.4	20397.5	14279.6	27389.1	19750.8	14204.4	17996.9	19979.1	18546.2	20606.2	20297.3	17076.3
635	sp|P19944|RLA1_RAT	60S acidic ribosomal protein P1 OS=Rattus norvegicus OX=10116 GN=Rplp1 PE=3 SV=1	33394.2	69077.4	47409.8	72258	89599.3	54297.5	565.189	118.919	3241.97	112.761	155.384	18469.3
636	tr|Q6TXF3|Q6TXF3_RAT	Acyl-CoA-binding protein OS=Rattus norvegicus OX=10116 GN=Dbi PE=1 SV=1	37565.7	18918.3	37194.8	26963	41930.2	51748	33207	34999.4	25264	33058.4	53393.1	21825.5
637	sp|Q80W89|NDUAB_RAT	NADH dehydrogenase [ubiquinone] 1 alpha subcomplex subunit 11 OS=Rattus norvegicus OX=10116 GN=Ndufa11 PE=2 SV=1	4678.6	6801.06	6160.7	3104.19	5296.7	4164.87	5120.81	1525.26	3197.59	6782.19	1824.04	3127.47
638	sp|P35171|CX7A2_RAT	Cytochrome c oxidase subunit 7A2, mitochondrial OS=Rattus norvegicus OX=10116 GN=Cox7a2 PE=1 SV=1	65035.2	57511.2	80568.6	76285.4	34782.4	53600.6	69244	105266	52674.4	67347.7	88622.5	45428.4
639	sp|P04166|CYB5B_RAT	Cytochrome b5 type B OS=Rattus norvegicus OX=10116 GN=Cyb5b PE=1 SV=2	15786.7	17006.6	22389.7	25397.2	18136.8	16912.5	9516.61	12485.8	15776.8	11446.2	18861.4	13344.5
640	sp|P01041|CYTB_RAT	Cystatin-B OS=Rattus norvegicus OX=10116 GN=Cstb PE=1 SV=1	57157.6	48250.8	34875.1	37575.4	36529.5	50712.4	41039.8	51838.1	43508.1	25790.9	17128.4	21599.8
641	tr|Z4YNF4|Z4YNF4_RAT	Low molecular weight cytosolic acid phosphatase OS=Rattus norvegicus OX=10116 GN=Acp1 PE=1 SV=2	14534.4	12571.4	16325	1504.18	11813.1	11041.6	11312.2	12914.7	12269.7	7991.76	9101.88	6164.55
642	sp|P05964|S10A6_RAT	Protein S100-A6 OS=Rattus norvegicus OX=10116 GN=S100a6 PE=1 SV=3	85999.8	72515.8	68646.7	119935	86111.7	36936.8	112321	135637	71663.6	98632.7	149098	90681.9
643	tr|A0A0G2K8Q8|A0A0G2K8Q8_RAT	Ubiquinol-cytochrome c reductase, complex III subunit X OS=Rattus norvegicus OX=10116 GN=Uqcr10 PE=1 SV=1	24013.8	23847.1	22663.4	25671.2	29405	13655.7	14383.5	15786.2	13267.1	14143.2	9304.74	20586.7
644	sp|P11951|CX6C2_RAT	Cytochrome c oxidase subunit 6C-2 OS=Rattus norvegicus OX=10116 GN=Cox6c2 PE=1 SV=3	86107.3	73757.4	98666	71610.1	53436.4	78394.4	127994	149652	120424	83644.6	107564	111353
645	tr|B5DFD8|B5DFD8_RAT	SH3 domain-binding glutamic acid-rich-like protein OS=Rattus norvegicus OX=10116 GN=Sh3bgrl PE=1 SV=1	15090.3	13498.5	11749.5	15725.9	13841.7	13610.1	1790.99	461.327	6174.95	3744.48	9516.58	10966.5
646	tr|F1LPM3|F1LPM3_RAT	Sorbin and SH3 domain-containing protein 2 OS=Rattus norvegicus OX=10116 GN=Sorbs2 PE=1 SV=2	22181.1	38368.9	48775.3	29499.3	54450.2	11962	329.155	213.908	13492.8	236.708	6803.13	26043.2
647	sp|P80067|CATC_RAT	Dipeptidyl peptidase 1 OS=Rattus norvegicus OX=10116 GN=Ctsc PE=1 SV=3	4637.77	9825.23	4659.43	5866.58	9574.54	8470.04	2549.63	2299.79	3875.73	964.136	2511.59	5441.5
648	sp|P14659|HSP72_RAT	Heat shock-related 70 kDa protein 2 OS=Rattus norvegicus OX=10116 GN=Hspa2 PE=1 SV=2	32099.4	32109.9	24422.1	28968.6	42517	19555.5	15888	19200.8	18899.9	22959.7	13476.6	21765.3
649	tr|F1LTF8|F1LTF8_RAT	Laminin subunit alpha 4 OS=Rattus norvegicus OX=10116 GN=Lama4 PE=1 SV=3	11356.6	11554.5	10938.1	6348.6	7606.44	10392.1	6649.3	7634.69	8489.82	16084	3495.89	9787.28
650	tr|F1LS29|F1LS29_RAT	Calcium-activated neutral proteinase 1 OS=Rattus norvegicus OX=10116 GN=Capn1 PE=1 SV=1	3727.54	2601.81	4511.98	2879.73	2517.25	1960.42	158.935	178.767	1531.85	456.978	455.466	844.062
651	tr|Q4JEI6|Q4JEI6_RAT	Defensin alpha 8 OS=Rattus norvegicus OX=10116 GN=Defa8 PE=2 SV=1	49193.1	68557.9	21473.4	49085.4	115444	87890.2	18047.4	97414.2	44051.8	71013.6	87596.1	60182.7
652	sp|Q497B0|NIT2_RAT	Omega-amidase NIT2 OS=Rattus norvegicus OX=10116 GN=Nit2 PE=1 SV=1	380.178	623.759	198.597	600.028	3545.93	1276.54	299.605	3629.8	323.154	2073.84	4862.83	3973.66
653	tr|G3V6I9|G3V6I9_RAT	60S ribosomal protein L26 OS=Rattus norvegicus OX=10116 GN=Rpl26 PE=1 SV=1	54727.6	44817.6	55594.1	21226	16417.2	63351.6	50635.4	50477.4	53118.3	47332.5	16947.2	38628.6
654	sp|Q9Z1H9|CAVN3_RAT	Caveolae-associated protein 3 OS=Rattus norvegicus OX=10116 GN=Cavin3 PE=1 SV=1	6502.92	24624.4	8591.02	29935.2	48774.3	8798.33	8711.99	11202.2	13806.4	12369.2	14147.6	10802.7
655	sp|Q6P0K8|PLAK_RAT	Junction plakoglobin OS=Rattus norvegicus OX=10116 GN=Jup PE=1 SV=1	16147.9	5718.79	14505.7	8192.31	7296.17	10440.4	7424.68	16396.7	6286.96	12103	9750.81	8455.28
656	tr|G3V8Q1|G3V8Q1_RAT	Coatomer subunit epsilon OS=Rattus norvegicus OX=10116 GN=Cope PE=1 SV=3	8842.71	9467.12	8499.21	5746.33	10480.6	6520.66	5498.14	5815.84	8688.42	7014.23	4669.99	6664.61
657	sp|Q641Y2|NDUS2_RAT	NADH dehydrogenase [ubiquinone] iron-sulfur protein 2, mitochondrial OS=Rattus norvegicus OX=10116 GN=Ndufs2 PE=1 SV=1	18002	20916.5	14490.3	17295.8	15533	12936.3	6002.84	1428.57	8066.75	1182.8	6905.17	11057.2
658	tr|O55158|O55158_RAT	Tetraspanin OS=Rattus norvegicus OX=10116 GN=Tspan8 PE=2 SV=2	51695.7	48098.5	47152.1	25317.2	10144.5	42203.4	41941	53990.5	63302.9	64380.7	13376.3	30346.3
659	tr|G3V6W6|G3V6W6_RAT	Proteasome 26S subunit, ATPase 6 OS=Rattus norvegicus OX=10116 GN=Psmc6 PE=1 SV=1	4515.17	6964.56	6873.86	9124.48	10718.7	6576.1	4647.56	6045.46	4833.37	5446.04	8129.08	7931.74
660	tr|D3ZUD8|D3ZUD8_RAT	Transmembrane 9 superfamily member OS=Rattus norvegicus OX=10116 GN=Tm9sf3 PE=1 SV=2	15602.7	13734	14503.3	11623.4	8670.26	14468.3	5765.49	15615	19803.3	16667.1	2974.58	10643.1
661	tr|A0A0G2K8K9|A0A0G2K8K9_RAT	RNA-binding motif protein, X-linked-like 1B OS=Rattus norvegicus OX=10116 GN=Rbmxl1b PE=4 SV=1	42081.7	34695.8	37163.1	34634.9	34292.6	41600	40917.5	50056.5	31857.1	24962.9	28703.6	44586.3
662	tr|A0A140TAG9|A0A140TAG9_RAT	Hsp90 chaperone protein kinase-targeting subunit OS=Rattus norvegicus OX=10116 GN=Cdc37 PE=1 SV=1	10804	13204.7	5371.38	10537	8371.08	13258.3	6756.56	7820.93	5782.84	4937.62	1616.75	8249.64
663	sp|P55053|FABP5_RAT	Fatty acid-binding protein 5 OS=Rattus norvegicus OX=10116 GN=Fabp5 PE=1 SV=3	19495.4	23847	13795.5	14360.8	21000.3	23911.6	17284.8	18753.9	19858	17524	12525.5	20971
664	sp|P19139|CSK21_RAT	Casein kinase II subunit alpha OS=Rattus norvegicus OX=10116 GN=Csnk2a1 PE=1 SV=2	10166.7	12438.1	11478.4	6548.61	12178.5	8453.6	5193.94	5796.98	8834.92	8966.73	5583.82	10444.1
665	tr|W4VSR4|W4VSR4_RAT	Nidogen-2 OS=Rattus norvegicus OX=10116 GN=Nid2 PE=1 SV=2	9856.84	18005.2	13219.2	4609.63	13396.6	14564.2	9919.71	15854.3	7151.46	14426.1	6427.38	11999.6
666	sp|Q711G3|IAH1_RAT	Isoamyl acetate-hydrolyzing esterase 1 homolog OS=Rattus norvegicus OX=10116 GN=Iah1 PE=2 SV=2	14099.9	13679.7	14424.6	18935.6	17739.5	18855.4	21574.6	24383.7	15684.2	11615.1	21894.3	18230.7
667	tr|D4AEC0|D4AEC0_RAT	Histone H2A OS=Rattus norvegicus OX=10116 GN=H2afv PE=3 SV=1	163086	141765	149526	163267	150883	224639	195105	160851	149390	193934	230026	225179
668	tr|A0A0H2UHI5|A0A0H2UHI5_RAT	Serine protease inhibitor A3N OS=Rattus norvegicus OX=10116 GN=Serpina3n PE=1 SV=1	10681.7	13710.4	41236.1	11003.3	16325.6	8974.74	5360.38	7027.75	8944.33	15068.8	11328.8	20044.6
669	sp|P24051|RS27L_RAT	40S ribosomal protein S27-like OS=Rattus norvegicus OX=10116 GN=Rps27l PE=1 SV=3	39666.7	22421.7	36945.1	24273.9	27394.7	41876.5	26004.9	34616.2	39844.6	17044.6	10808.7	14054
670	tr|B5DFB2|B5DFB2_RAT	RB-binding protein 4, chromatin-remodeling factor OS=Rattus norvegicus OX=10116 GN=Rbbp4 PE=1 SV=1	17579.5	21204.4	11171.6	7775.7	20004.1	15939.4	22330.9	16058.6	19698.4	19070.7	6337.03	17906.6
671	tr|G3V8U9|G3V8U9_RAT	Proteasome subunit beta OS=Rattus norvegicus OX=10116 GN=Psmb4 PE=1 SV=2	32872.9	26338.7	21714.1	30410.9	21429.8	33895	22537.9	25572.1	23293.3	21817.6	13715.6	20211.1
672	tr|Q8R3Z7|Q8R3Z7_RAT	EH-domain-containing 4 OS=Rattus norvegicus OX=10116 GN=Ehd4 PE=1 SV=1	5438.73	4003.95	4231.21	3532.68	5404.58	3964.48	3250.6	4679.75	4055.72	3722.14	3997.99	3465.48
673	sp|P06768|RET2_RAT	Retinol-binding protein 2 OS=Rattus norvegicus OX=10116 GN=Rbp2 PE=1 SV=3	29708.5	14432.3	42430.8	924.991	10279	30798.7	16851.6	29993.8	21500.4	743.477	5210.85	7393.11
674	tr|Q6AYS3|Q6AYS3_RAT	Carboxypeptidase OS=Rattus norvegicus OX=10116 GN=Ctsa PE=1 SV=1	15256.6	14056.7	14557	14213.3	11364	9403.1	3223.03	5307.79	4155.65	3406.01	11229.2	10310
675	tr|Q3KRF2|Q3KRF2_RAT	High density lipoprotein binding protein (Vigilin) OS=Rattus norvegicus OX=10116 GN=Hdlbp PE=1 SV=1	13644.8	9328.94	10256.6	16102.4	7116.75	8578.43	5471.08	9678.45	7758.79	6310.63	7461.01	5244.35
676	tr|Q5RJN0|Q5RJN0_RAT	Complex I-20kD OS=Rattus norvegicus OX=10116 GN=Ndufs7 PE=1 SV=1	5570.8	10091.3	3337.16	1142.83	8204.89	3329.4	7774.16	4797.63	988.919	8053.63	3879.34	6862.47
677	sp|P16391|HA12_RAT	RT1 class I histocompatibility antigen, AA alpha chain OS=Rattus norvegicus OX=10116 PE=1 SV=2	38053.3	37021.4	42525.1	38769.2	37257.2	43674.8	42017.5	34319.9	33449.3	41972.9	37946.1	32732.9
678	tr|Q66HI5|Q66HI5_RAT	Ferritin OS=Rattus norvegicus OX=10116 GN=Fth1 PE=1 SV=2	641.847	12555	310.318	14653.2	395.216	14796.4	661.414	441.593	5254.71	917.576	10838.8	229.809
679	tr|F1M265|F1M265_RAT	Uncharacterized protein OS=Rattus norvegicus OX=10116 PE=1 SV=3	781.404	6828.92	6427.83	3909.17	6853.63	4198.44	3379.04	7796.39	3557.86	6905.08	2245.37	3963.67
680	sp|Q499T2|GILT_RAT	Gamma-interferon-inducible lysosomal thiol reductase OS=Rattus norvegicus OX=10116 GN=Ifi30 PE=2 SV=1	31185.1	31594	35059.4	39035.9	31340.9	14230.7	28467.5	32648.2	28030.3	23481.1	38192.4	24959.8
681	sp|P20070|NB5R3_RAT	NADH-cytochrome b5 reductase 3 OS=Rattus norvegicus OX=10116 GN=Cyb5r3 PE=1 SV=2	11373.6	14149.3	14808	16852.7	12844.5	14842.5	13697	13354.8	18479.7	17706.3	9805.29	12262.5
682	sp|Q01177|PLMN_RAT	Plasminogen OS=Rattus norvegicus OX=10116 GN=Plg PE=2 SV=2	10320.6	6508.82	8129.5	7900.88	7120.86	9812.32	16611.8	31851.4	10780.1	11921.7	5251.78	5484.78
683	tr|D3ZLA3|D3ZLA3_RAT	Copine 3 OS=Rattus norvegicus OX=10116 GN=Cpne3 PE=1 SV=1	44889.6	42664.9	45119.5	9084.53	11449.5	31029.8	15762.8	15853.2	17643.4	15764.9	8393.01	13449.1
684	sp|P29266|3HIDH_RAT	3-hydroxyisobutyrate dehydrogenase, mitochondrial OS=Rattus norvegicus OX=10116 GN=Hibadh PE=1 SV=3	11782.4	19115.8	20714.4	23852.6	21157.3	14862.1	5775.21	23873.9	16630.4	6935.79	18386.2	15700.5
685	sp|Q5I0G4|GARS_RAT	Glycine--tRNA ligase OS=Rattus norvegicus OX=10116 GN=Gars1 PE=1 SV=2	7616.18	7064.32	8319.79	7931.05	1362.19	1949.21	5716.07	4881.67	6258.66	4574.58	2478.58	4019.12
686	tr|G3V6H9|G3V6H9_RAT	Nucleosome assembly protein 1-like 1 OS=Rattus norvegicus OX=10116 GN=Nap1l1 PE=1 SV=1	13014.4	18756.1	15990.4	26480.9	20687.9	14303.1	9240.19	10304.8	8316.4	9115.24	13137	9907.61
687	tr|G3V6A9|G3V6A9_RAT	Microfibril associated protein 4 OS=Rattus norvegicus OX=10116 GN=Mfap4 PE=1 SV=2	15469.9	25661.8	12014.4	12929.1	36879.5	13571.7	9521.38	8423.97	8575.66	13260.7	6434.18	11832.7
688	tr|A0A0G2K8T0|A0A0G2K8T0_RAT	Acid ceramidase OS=Rattus norvegicus OX=10116 GN=Asah1 PE=1 SV=1	16343.5	24717.7	25522.7	27127.1	16817.4	11069.7	13331.7	8773.15	14862	10301.1	10960.9	5513.11
689	tr|D3ZX87|D3ZX87_RAT	60S ribosomal protein L31 OS=Rattus norvegicus OX=10116 PE=3 SV=2	40088.9	34354.7	34834.9	55910.3	88922.6	22930.5	21850.3	118602	80499.1	66225.4	14863.4	58725
690	tr|F1LZC5|F1LZC5_RAT	Complex I-B16.6 OS=Rattus norvegicus OX=10116 PE=3 SV=2	58975.8	58668.5	64016.4	52717	46751.8	59913.2	22532.7	25251.9	26813.7	24555.7	16904	39722.4
691	sp|P15178|SYDC_RAT	Aspartate--tRNA ligase, cytoplasmic OS=Rattus norvegicus OX=10116 GN=Dars1 PE=1 SV=1	12630	11293.8	8225.51	10975.1	9694.38	5188.29	8519.2	14492.4	13983.5	9701.62	8067.15	5042.88
692	tr|D4A1Q8|D4A1Q8_RAT	BCL2-like 15 OS=Rattus norvegicus OX=10116 GN=Bcl2l15 PE=4 SV=1	34105.5	38281.1	33947.9	48250.1	18484.1	9837.96	32827	58789.1	52273.4	25345.3	47981.3	13945.8
693	tr|D3ZS58|D3ZS58_RAT	NADH dehydrogenase [ubiquinone] 1 alpha subcomplex subunit 2 OS=Rattus norvegicus OX=10116 GN=Ndufa2 PE=1 SV=1	7891.82	6773.17	8901.21	7795.57	5578.19	5399.75	8845.95	10571.1	6446.88	5750.22	9570	7060.79
694	sp|P97541|HSPB6_RAT	Heat shock protein beta-6 OS=Rattus norvegicus OX=10116 GN=Hspb6 PE=1 SV=1	7500.75	7792.12	8591.22	8461.38	12498.4	5275.7	15956.8	15918.9	19065.2	15673	13771.5	17031.8
695	tr|D3ZN21|D3ZN21_RAT	RNA helicase OS=Rattus norvegicus OX=10116 GN=Ddx3y PE=1 SV=1	18782.8	17567	10486.6	15452.6	13286.5	6836.22	3623	4855.12	4391.43	5042.89	3079.8	4950.59
696	sp|Q4FZT9|PSMD2_RAT	26S proteasome non-ATPase regulatory subunit 2 OS=Rattus norvegicus OX=10116 GN=Psmd2 PE=1 SV=1	11363.5	11532	11429.6	6983.64	11687.9	14210.9	10561.1	14351.9	11298.5	11055.8	8441.57	5834
697	sp|P02767|TTHY_RAT	Transthyretin OS=Rattus norvegicus OX=10116 GN=Ttr PE=1 SV=1	55697.5	54646.4	5223.74	85297.8	52723.5	25008.4	2641.06	89544.4	94407.2	57802.3	621.891	1140.9
698	tr|D4A3T3|D4A3T3_RAT	Chromobox 1 OS=Rattus norvegicus OX=10116 GN=Cbx1 PE=1 SV=1	7577.91	10168.8	2387.24	13722.3	10168.7	10198.4	10345.3	6279.65	3789.8	8257.17	9090.81	9555.85
699	tr|D4A781|D4A781_RAT	Importin 5 OS=Rattus norvegicus OX=10116 GN=Ipo5 PE=1 SV=1	32886.9	14258.4	27410.8	34769.9	31651.9	35410.4	20459	23806.2	26743.3	25166.6	20729.7	5267.96
700	tr|A0A0A0MXY5|A0A0A0MXY5_RAT	ATP-dependent 6-phosphofructokinase OS=Rattus norvegicus OX=10116 GN=Pfkp PE=1 SV=2	25451.8	19840.2	25450.1	14656.9	14340.9	24223.3	15867.7	6180.9	19704.7	16623.2	8899.79	16434.3
701	tr|Q6IN22|Q6IN22_RAT	Cathepsin B OS=Rattus norvegicus OX=10116 GN=Ctsb PE=1 SV=1	9544.86	9294.96	10821.3	5734.59	4632.43	8450.24	7420.25	6895.87	8113.33	7029.41	1875.47	6342.77
702	tr|B5DFC3|B5DFC3_RAT	Protein transport protein SEC23 OS=Rattus norvegicus OX=10116 GN=Sec23a PE=1 SV=1	21701.2	21687.5	23403.4	16265.7	14663.4	18070.1	446.387	365.928	1361.96	208.46	855.62	2845.4
703	tr|Q6P2A5|Q6P2A5_RAT	GTP:AMP phosphotransferase AK3, mitochondrial OS=Rattus norvegicus OX=10116 GN=Ak3 PE=1 SV=1	19502.1	16194.3	22185.4	17132.2	18374.1	13775.5	13153.9	21809	15447.5	16596.2	16509.1	17749.2
704	tr|Q6MG98|Q6MG98_RAT	Histocompatibility 2, class II antigen E alpha OS=Rattus norvegicus OX=10116 GN=RT1-Da PE=1 SV=1	6130.55	6652.74	6712.17	3804.97	5573.79	8695.5	5246.89	5180.24	1670.16	5820.07	4342.87	6363.28
705	sp|Q2PQA9|KINH_RAT	Kinesin-1 heavy chain OS=Rattus norvegicus OX=10116 GN=Kif5b PE=1 SV=1	2092.44	2902.81	2394.67	3432.47	1336.46	1513.54	3551.21	5024.69	2819.26	2366.58	1470.26	2052.59
706	tr|A0A0A0MY01|A0A0A0MY01_RAT	Fatty acid-binding protein 2 OS=Rattus norvegicus OX=10116 GN=Fabp2 PE=1 SV=1	80116.3	21174.6	77783.1	21165.1	8737.73	32998.6	93329.6	288039	73894.3	30499.8	12239.9	18322.6
707	tr|G3V940|G3V940_RAT	Coronin OS=Rattus norvegicus OX=10116 GN=Coro1b PE=1 SV=1	31417.3	24482.7	31418.7	15750.5	957.061	25583.6	21271.6	37417.3	28172.8	28926	9894.75	17712.7
708	tr|M0RA24|M0RA24_RAT	Complex I-B12 OS=Rattus norvegicus OX=10116 PE=3 SV=2	10513.6	4155.67	13874.1	9373.13	7066.77	8309.83	7530.94	12414.4	10761.4	12303.4	5272.88	9325.4
709	tr|Q66HM2|Q66HM2_RAT	AP-2 complex subunit alpha OS=Rattus norvegicus OX=10116 GN=Ap2a2 PE=1 SV=1	11567	8987.36	10650.8	9180.03	8545.71	9782.16	9830.34	10711.5	12105.4	11154.1	8380.21	8702
710	sp|Q78P75|DYL2_RAT	Dynein light chain 2, cytoplasmic OS=Rattus norvegicus OX=10116 GN=Dynll2 PE=1 SV=1	5552.34	10367.9	10555.3	7764.27	9138.24	6557.42	4055.4	12703.5	11313.1	10908.2	5743.47	3197.15
711	sp|Q5XIC0|ECI2_RAT	Enoyl-CoA delta isomerase 2 OS=Rattus norvegicus OX=10116 GN=Eci2 PE=1 SV=1	12721.7	17892.1	15358.5	16387.7	13933.3	18413.2	15019.5	15239.1	19896.9	15104.8	17701.8	12665
712	tr|A0A0A0MY14|A0A0A0MY14_RAT	40S ribosomal protein S28 OS=Rattus norvegicus OX=10116 GN=LOC100359503 PE=3 SV=1	76740.7	68960.7	76279.8	81104.8	62642.1	70295.8	52875.1	62854	50859.1	48104.8	71775.5	50224.9
713	sp|P63164|RSMN_RAT	Small nuclear ribonucleoprotein-associated protein N OS=Rattus norvegicus OX=10116 GN=Snrpn PE=2 SV=1	11667.9	9395.88	5007.31	7054.9	6689.13	4960.77	4557.69	9645.26	9630.11	5976.74	4822.78	3898.45
714	sp|P0C5H9|MANF_RAT	Mesencephalic astrocyte-derived neurotrophic factor OS=Rattus norvegicus OX=10116 GN=Manf PE=1 SV=1	17170.9	12762.4	20557.4	20734.9	4572.79	17287	8943.37	9656.6	8325.52	10010.6	11872.3	6393.61
715	tr|Q5GAM2|Q5GAM2_RAT	Ribonuclease 17 OS=Rattus norvegicus OX=10116 GN=Rnase17 PE=3 SV=1	25906.6	33332.8	21750	7412.29	28761.5	37870.9	24433.5	16261.3	26262.5	24837	14204.4	31394.6
716	tr|G3V6C1|G3V6C1_RAT	RCG24055, isoform CRA_b OS=Rattus norvegicus OX=10116 GN=Serpinb5 PE=3 SV=3	11405.7	5709.75	10694.3	8192.51	5801.61	9564.9	4365.58	4856.07	5963.29	5929.12	4378.07	5196.11
717	tr|G3V8D5|G3V8D5_RAT	6-phosphogluconolactonase OS=Rattus norvegicus OX=10116 GN=Pgls PE=1 SV=1	19186.7	17282.8	23445.4	23271.6	21445	18768.5	155.398	245.964	161.09	170.664	146.308	415.161
718	tr|E9PT29|E9PT29_RAT	RNA helicase OS=Rattus norvegicus OX=10116 GN=Ddx17 PE=1 SV=3	3289.75	5200.95	4057.62	5541.33	9333.76	5976.56	1073.83	2381.56	2062.85	4425.37	2604.03	4163.22
719	sp|P50503|F10A1_RAT	Hsc70-interacting protein OS=Rattus norvegicus OX=10116 GN=St13 PE=1 SV=1	20174.7	23794.6	23189.2	21590.8	22876.9	17450.3	9640.4	9220.41	18217.2	17081.4	11978.2	17622.6
720	sp|P12007|IVD_RAT	Isovaleryl-CoA dehydrogenase, mitochondrial OS=Rattus norvegicus OX=10116 GN=Ivd PE=1 SV=2	2795.09	2721.68	1911.9	2190.57	2384.33	1584.94	2849.79	2855.36	3177.34	2423.02	1292.04	2463.46
721	sp|Q91ZW6|TMLH_RAT	Trimethyllysine dioxygenase, mitochondrial OS=Rattus norvegicus OX=10116 GN=Tmlhe PE=1 SV=2	23170.3	15801.8	25016.6	15646.8	8675.34	16133.1	17169.2	19140.1	19801.5	12188.8	5368.86	8669.98
722	tr|Q4V8N0|Q4V8N0_RAT	Lipocalin 7, isoform CRA_a OS=Rattus norvegicus OX=10116 GN=Tinagl1 PE=1 SV=1	12541.2	20747.4	20002.7	5763.26	10145.3	13513	9965.11	8793.21	9309.91	17279.2	2842.92	12854.2
723	tr|G3V7K3|G3V7K3_RAT	Ceruloplasmin OS=Rattus norvegicus OX=10116 GN=Cp PE=1 SV=1	1444.22	22059.2	14203.4	5279.03	11025.5	13832.7	6725.42	8670.97	7517.89	6114.71	1302.31	6741.06
724	sp|B0K020|CISD1_RAT	CDGSH iron-sulfur domain-containing protein 1 OS=Rattus norvegicus OX=10116 GN=Cisd1 PE=3 SV=1	29924.3	24532.4	33859.1	29346.4	30110.9	30293.3	34690.6	27904.4	32908.2	34655.5	40529.3	34907.7
725	tr|A0A0G2JSH2|A0A0G2JSH2_RAT	3-hydroxybutyrate dehydrogenase, type 1, isoform CRA_a OS=Rattus norvegicus OX=10116 GN=Bdh1 PE=1 SV=1	11315.3	4011.77	5271.22	5940.83	531.966	3353.18	6745.55	1196.27	11006.9	5725.37	4141.57	7916.5
726	tr|D4AAT4|D4AAT4_RAT	Sm protein F OS=Rattus norvegicus OX=10116 GN=Snrpf PE=1 SV=1	2543.74	1405.76	2165.78	2337.88	2027.96	2639.67	2616.36	2847.85	2049.11	1366.79	1963.21	3225.11
727	tr|G3V6C4|G3V6C4_RAT	UDP-glucose 6-dehydrogenase OS=Rattus norvegicus OX=10116 GN=Ugdh PE=1 SV=1	21594.7	18042.1	18726	14797.6	6969.69	21113.1	13281.1	22988.8	18956.9	17679.7	7172.06	4443.88
728	tr|Q6MGA6|Q6MGA6_RAT	Proteasome subunit beta OS=Rattus norvegicus OX=10116 GN=Psmb9 PE=1 SV=1	37061.7	38319	34528.2	33372.8	28977.7	39060.5	41989.9	51510.6	19928.5	38938.6	19185.9	36348.8
729	sp|Q5I0D1|GLOD4_RAT	Glyoxalase domain-containing protein 4 OS=Rattus norvegicus OX=10116 GN=Glod4 PE=1 SV=1	26187	20460	19260.3	29429.9	19681.7	15299.9	16509	24742.5	21533.8	16880	16792	15300
730	tr|Q5XIP0|Q5XIP0_RAT	DnaJ (Hsp40) homolog, subfamily B, member 4 OS=Rattus norvegicus OX=10116 GN=Dnajb4 PE=1 SV=1	10541.1	7399.89	7300.37	11100.8	14068.1	10495	4362.59	9143.22	11562.3	11467.5	9584.53	12912.5
731	sp|P22734|COMT_RAT	Catechol O-methyltransferase OS=Rattus norvegicus OX=10116 GN=Comt PE=1 SV=2	9366.51	7898.55	1212.49	956.883	343.099	5724.49	564.408	537.602	2370.41	1591.72	5504.18	456.344
732	sp|B5DEH2|ERLN2_RAT	Erlin-2 OS=Rattus norvegicus OX=10116 GN=Erlin2 PE=1 SV=1	5315.82	4232.51	3687.75	4755.84	3015.74	345.221	3232.1	4572.73	3965.4	3970.64	1296.34	2424.8
733	tr|F1M978|F1M978_RAT	Inositol-1-monophosphatase OS=Rattus norvegicus OX=10116 GN=Impa1 PE=1 SV=1	24436.1	21633.1	17518.7	15893.9	22285.8	30567.7	20309.7	22004.7	24276.4	20783.5	9806.74	21269
734	tr|Q4V8I9|Q4V8I9_RAT	UTP--glucose-1-phosphate uridylyltransferase OS=Rattus norvegicus OX=10116 GN=Ugp2 PE=1 SV=1	4657.21	23100.6	6344.9	20153.1	5560.09	19009.3	570.858	2500.74	22162.1	15958.8	1969.62	11498.4
735	sp|P63029|TCTP_RAT	Translationally-controlled tumor protein OS=Rattus norvegicus OX=10116 GN=Tpt1 PE=1 SV=1	64113.8	49949.3	52227.9	76870.7	57214.9	67659.2	5961.96	1142.09	44661.3	32763.3	60605.4	49942.6
736	tr|Q2IBC6|Q2IBC6_RAT	Caveolin OS=Rattus norvegicus OX=10116 GN=Cav1 PE=1 SV=1	16159.4	34878.3	26212.6	16850.3	45054.9	32669.4	9119.85	8888.24	13691	14934.2	2656.11	22195.5
737	sp|Q6P747|HP1B3_RAT	Heterochromatin protein 1-binding protein 3 OS=Rattus norvegicus OX=10116 GN=Hp1bp3 PE=1 SV=1	14989.7	11009.5	9035.95	12679.6	13416.9	18269.5	15949.7	13682.4	16100.4	14153.8	18119.4	18331.9
738	tr|Q6IRS6|Q6IRS6_RAT	Fetub protein OS=Rattus norvegicus OX=10116 GN=Fetub PE=1 SV=1	10521.9	8599.32	9752.36	13021.7	7714	6728.26	7942.76	9292.29	14283.2	6790.32	10352.4	6558.41
739	tr|Q6P6T6|Q6P6T6_RAT	Cathepsin D OS=Rattus norvegicus OX=10116 GN=Ctsd PE=1 SV=1	34633.4	44117.5	44416.1	27691.5	47985.3	49484.9	15294.5	34721.7	43030.9	40132.3	27438	47550.8
740	tr|F1MA59|F1MA59_RAT	Collagen type IV alpha 1 chain OS=Rattus norvegicus OX=10116 GN=Col4a1 PE=1 SV=1	6949.4	13045.5	7872.2	1097.14	11947.3	10215.8	7894.75	6174.62	6909.95	10194.3	2863.62	4138.59
741	tr|A0A0G2K4X8|A0A0G2K4X8_RAT	S-phase kinase-associated protein 1 OS=Rattus norvegicus OX=10116 GN=Skp1 PE=1 SV=1	30622.1	29123.3	29579.3	27655.4	23084.4	22252	26571.5	30797.8	28628.1	26644.8	25706.6	25243.6
742	sp|P43138|APEX1_RAT	DNA-(apurinic or apyrimidinic site) endonuclease OS=Rattus norvegicus OX=10116 GN=Apex1 PE=1 SV=2	5711.89	6406.02	4729.03	5917.71	8055.19	6227.84	14326.5	15171.9	5506.65	12254.2	8513.73	14789.2
743	tr|D4A8T3|D4A8T3_RAT	Coatomer subunit zeta OS=Rattus norvegicus OX=10116 GN=Copz1 PE=1 SV=1	11830.3	12517.1	8871.24	8048.82	4485.47	8657.93	7300.78	8278.48	8234.53	8191.59	2373.58	7417.84
744	sp|P14141|CAH3_RAT	Carbonic anhydrase 3 OS=Rattus norvegicus OX=10116 GN=Ca3 PE=1 SV=3	7188.08	23691.6	22667.6	23466.1	11253.7	7383.32	7845.94	11911.4	27951.2	7841.41	42115	4568.94
745	sp|Q66H71|CPPED_RAT	Serine/threonine-protein phosphatase CPPED1 OS=Rattus norvegicus OX=10116 GN=Cpped1 PE=1 SV=1	2175.43	1703.47	4444.46	2206.28	3443.43	2025.36	2475.52	2227.07	1781.71	2104.48	499.219	2152.15
746	tr|D3ZIC4|D3ZIC4_RAT	Protein phosphatase 1 regulatory subunit OS=Rattus norvegicus OX=10116 GN=Ppp1r12b PE=1 SV=1	19488.4	20279.3	17097.4	15352	22913.5	20602.7	17848.2	22254	15048.7	20679.9	24137	25283.6
747	tr|Q5I0M1|Q5I0M1_RAT	Apolipoprotein H OS=Rattus norvegicus OX=10116 GN=Apoh PE=1 SV=1	28754.6	27368.5	37466.3	39366.2	35284.9	26012.9	28352	28790.8	32383.1	27072.6	28472.4	25201.1
748	tr|D4A2C6|D4A2C6_RAT	U6 snRNA-associated Sm-like protein LSm4 OS=Rattus norvegicus OX=10116 GN=Lsm4 PE=1 SV=1	34419	36723.4	1001.19	710.169	353.425	23594.9	12130.7	813.43	19035.2	16035.4	26904	23110.4
749	tr|B1WC34|B1WC34_RAT	Glucosidase 2 subunit beta OS=Rattus norvegicus OX=10116 GN=Prkcsh PE=1 SV=1	7123.67	3791.7	6677.67	6265.51	4609	5887.97	6344.35	10765.5	6337.77	6455.54	6623.35	6649.04
750	sp|P62775|MTPN_RAT	Myotrophin OS=Rattus norvegicus OX=10116 GN=Mtpn PE=1 SV=2	2340.58	6640.66	910.906	5316.21	10793.6	345.806	5603.23	5343.09	2953.17	2347.9	7667.42	3769.91
751	tr|A0A0G2K0Z7|A0A0G2K0Z7_RAT	Glycerol-3-phosphate dehydrogenase, mitochondrial OS=Rattus norvegicus OX=10116 GN=Gpd2 PE=1 SV=1	22695.3	11841.4	18202.6	14999.9	7872.59	21949.2	10972	14144.2	13113.9	16506.4	6267.72	7273.52
752	sp|P12075|COX5B_RAT	Cytochrome c oxidase subunit 5B, mitochondrial OS=Rattus norvegicus OX=10116 GN=Cox5b PE=1 SV=2	30100.4	21532	32398.5	17269.1	2176.03	22420.1	2120.9	4346.02	19578.6	2413.81	11739.8	22570.7
753	sp|Q6IFW6|K1C10_RAT	Keratin, type I cytoskeletal 10 OS=Rattus norvegicus OX=10116 GN=Krt10 PE=3 SV=1	6867.15	15677.4	5642.55	4619.97	3272.41	5800.02	4543.82	6074.96	4816.54	4593.01	10174.8	4281.29
754	tr|G3V6S3|G3V6S3_RAT	Calumenin OS=Rattus norvegicus OX=10116 GN=Calu PE=1 SV=1	20073.2	24031.1	28269.6	20101.1	27964.2	24566.9	18408.9	24749.1	19364	16711.7	29426.9	25558.4
755	tr|B0BMX3|B0BMX3_RAT	S100 calcium binding protein A16 (Predicted), isoform CRA_a OS=Rattus norvegicus OX=10116 GN=S100a16 PE=1 SV=1	7082.56	12442.9	10420	10766.2	8232.41	8253.84	9711.16	13219.1	2617.27	13168.8	9946	11921.5
756	tr|A0A140TAI8|A0A140TAI8_RAT	S-adenosylhomocysteine hydrolase-like protein 1 OS=Rattus norvegicus OX=10116 GN=Ahcyl1 PE=1 SV=1	39400.2	30290.6	38014.3	24977	15522.4	30177.8	26925.5	44319	33492.6	31265.4	13891.7	11211.1
757	tr|Q6P6U2|Q6P6U2_RAT	26S proteasome regulatory subunit 6A OS=Rattus norvegicus OX=10116 GN=Psmc3 PE=1 SV=1	1166.13	5081.84	7524.47	10075.9	10265.6	5882.12	1499.2	2069.4	5168.06	3854.26	4141.47	662.99
758	tr|D3ZAP9|D3ZAP9_RAT	Glycerol-3-phosphate dehydrogenase [NAD(+)] OS=Rattus norvegicus OX=10116 GN=Gpd1l PE=1 SV=1	15239.7	1223.18	14167.8	21052.7	12019.7	14441.9	17034.1	20921.5	16679.7	12626.6	16358.5	8644.6
759	tr|Q499Q4|Q499Q4_RAT	Phosphoglucomutase-1 OS=Rattus norvegicus OX=10116 GN=Pgm1 PE=1 SV=2	5219.6	6813.89	4707.64	4968.73	5176.06	5388.2	211.039	238.267	4350.61	357.095	4678.56	4872.02
760	sp|Q27W01|RBM8A_RAT	RNA-binding protein 8A OS=Rattus norvegicus OX=10116 GN=Rbm8a PE=1 SV=1	11342.7	4988.72	8573.58	7842.52	6524.17	9861.91	6938.15	8746.26	7701.88	6035.06	6623.56	6871.63
761	sp|Q920P6|ADA_RAT	Adenosine deaminase OS=Rattus norvegicus OX=10116 GN=Ada PE=1 SV=3	16983.5	31487.8	24307.1	27860.9	26158.8	23515.6	28640	18570.2	25826.7	12020.3	25175	33631.7
762	sp|Q6PDU7|ATP5L_RAT	ATP synthase subunit g, mitochondrial OS=Rattus norvegicus OX=10116 GN=Atp5mg PE=1 SV=2	8018.44	6920.94	2664.46	5897.51	6630.7	303.984	2054.84	5653.75	6185.05	5261.05	5853.02	1691.71
763	sp|O35796|C1QBP_RAT	Complement component 1 Q subcomponent-binding protein, mitochondrial OS=Rattus norvegicus OX=10116 GN=C1qbp PE=1 SV=2	40313.7	40968.4	25844.3	42285.5	35830.1	30372.8	2021	24915.3	10958.1	715.4	9820.33	15449.7
764	sp|P12785|FAS_RAT	Fatty acid synthase OS=Rattus norvegicus OX=10116 GN=Fasn PE=1 SV=3	7010.86	10138	9643.85	7769.92	7042.72	5989.46	5467.6	9287.85	9712.87	5774.57	3265.72	5607.75
765	tr|B5DES0|B5DES0_RAT	Small nuclear ribonucleoprotein Sm D2 OS=Rattus norvegicus OX=10116 GN=Snrpd2 PE=1 SV=1	13217.1	12542.9	10105.3	12701.1	8900.1	10293.5	2786.89	8333.66	4439.74	8280.37	10279.9	7541.13
766	sp|P05370|G6PD_RAT	Glucose-6-phosphate 1-dehydrogenase OS=Rattus norvegicus OX=10116 GN=G6pdx PE=1 SV=3	24610.2	37355	20650.4	11805.5	7615.85	36708.8	10578.3	9367.54	19029.5	6347.12	6384.93	11869.8
767	tr|Q4V8E2|Q4V8E2_RAT	26S proteasome regulatory subunit RPN11 OS=Rattus norvegicus OX=10116 GN=Psmd14 PE=1 SV=1	8754.89	15099	7203.54	9494.04	9214.43	14505.6	12545.7	6023.93	14836.6	14907.9	10719.8	9360.77
768	sp|Q9JMJ4|PRP19_RAT	Pre-mRNA-processing factor 19 OS=Rattus norvegicus OX=10116 GN=Prpf19 PE=1 SV=2	18764.5	8751.42	13825.3	11346.8	12592.7	11692.4	14320.5	12994.1	10812.1	14255.1	4782.32	12901.3
769	sp|P62845|RS15_RAT	40S ribosomal protein S15 OS=Rattus norvegicus OX=10116 GN=Rps15 PE=1 SV=2	80022.9	74169.3	81053.7	89347.8	57860.5	72922.9	85570.2	95992.3	86630.5	61705	82351.2	65069.8
770	tr|D3ZCZ9|D3ZCZ9_RAT	NADH dehydrogenase [ubiquinone] iron-sulfur protein 6, mitochondrial OS=Rattus norvegicus OX=10116 GN=LOC100912599 PE=1 SV=1	13996.5	7997.68	14129	7518.46	7084.02	9662.79	8837.11	14569	11892.5	12307.2	1135.9	12028.1
771	sp|P62138|PP1A_RAT	Serine/threonine-protein phosphatase PP1-alpha catalytic subunit OS=Rattus norvegicus OX=10116 GN=Ppp1ca PE=1 SV=1	11441.5	15394.9	13402	9112.92	11777.6	9623.4	10532.8	12062.9	6549.54	10987.1	4714.34	11115.1
772	tr|Q6AY18|Q6AY18_RAT	Inorganic pyrophosphatase 1 OS=Rattus norvegicus OX=10116 GN=Sar1a PE=1 SV=1	60411.8	51910	51108.4	48180.3	36995.6	59065.4	62501.5	55087.5	55142.6	52622.3	49602.8	49812.1
773	tr|G3V9G4|G3V9G4_RAT	ATP-citrate synthase OS=Rattus norvegicus OX=10116 GN=Acly PE=1 SV=1	28436.9	37135.6	25886.7	22803.4	26205.6	24411.7	13246	11983	27653.1	20252.3	3923.74	20234.9
774	tr|D4A5I9|D4A5I9_RAT	Unconventional myosin-6 OS=Rattus norvegicus OX=10116 GN=Myo6 PE=1 SV=3	2017.99	1804.72	1187.77	4987.63	2286.42	5623.39	5130.78	6112.74	2295.71	6773.66	858.3	5005.09
775	tr|Q66H18|Q66H18_RAT	Synaptophysin-like 1 OS=Rattus norvegicus OX=10116 GN=Sypl1 PE=1 SV=1	15460	22917.6	15561.2	12096.8	7450.67	20769.4	12812.6	10142.5	17815.5	14812	2559.5	12086.9
776	sp|Q63584|TMEDA_RAT	Transmembrane emp24 domain-containing protein 10 OS=Rattus norvegicus OX=10116 GN=Tmed10 PE=1 SV=2	19341.1	13958.6	10039.2	9657.56	7912.13	15604.3	291.151	323.74	2933.38	1853.87	1709.61	6415.19
777	tr|C0KUC6|C0KUC6_RAT	LIM and senescent cell antigen-like-containing domain protein OS=Rattus norvegicus OX=10116 GN=Lims1 PE=1 SV=1	26201.9	35625.1	41563.6	19287.8	22968.8	27648.7	22974.1	28652.9	32677	32070.1	10033.7	27255.5
778	tr|G3V743|G3V743_RAT	Mannosyl-oligosaccharide glucosidase OS=Rattus norvegicus OX=10116 GN=Mogs PE=3 SV=2	6943.55	6189.57	5185.69	5314.97	3893	2694.97	2880.06	2032.36	732.936	3123.54	1556.68	3919.47
779	sp|Q6AYS8|DHB11_RAT	Estradiol 17-beta-dehydrogenase 11 OS=Rattus norvegicus OX=10116 GN=Hsd17b11 PE=2 SV=1	16362.4	257.214	14892.6	836.022	453.285	9332.14	258.015	911.483	13090.8	3799.65	637.483	3876
780	sp|B5DFC8|EIF3C_RAT	Eukaryotic translation initiation factor 3 subunit C OS=Rattus norvegicus OX=10116 GN=Eif3c PE=1 SV=1	16905.4	19428.3	8098.19	12750.1	12927.8	9187.12	5753.28	11363.3	11655	7418.03	12801.4	16556.3
781	sp|P01048|KNT1_RAT	T-kininogen 1 OS=Rattus norvegicus OX=10116 GN=Map1 PE=1 SV=2	939.347	1411.94	938.906	2658.81	2395.34	2074.17	883.654	2520.13	2580.84	237.917	7972.9	3155.35
782	sp|Q6AYS7|ACY1A_RAT	Aminoacylase-1A OS=Rattus norvegicus OX=10116 GN=Acy1a PE=1 SV=1	12520.8	14264	5816.17	7097.94	8655.21	11799.3	8242.73	11455.5	8877.07	9460.74	6589.18	4452.85
783	tr|B5DFN1|B5DFN1_RAT	Eukaryotic translation initiation factor 1B OS=Rattus norvegicus OX=10116 GN=Eif1b PE=2 SV=1	6277.73	26282.7	25142.9	35230.5	9823.78	5943.88	22400.2	7000.45	449.476	25528.6	33768.5	29373
784	sp|Q6PEC1|TBCA_RAT	Tubulin-specific chaperone A OS=Rattus norvegicus OX=10116 GN=Tbca PE=1 SV=1	5170.41	4613.3	810.357	9204.11	5082.57	4945.34	5692.24	8317.12	1829.08	3606.78	7005.05	5147.62
785	sp|Q5I0E7|TMED9_RAT	Transmembrane emp24 domain-containing protein 9 OS=Rattus norvegicus OX=10116 GN=Tmed9 PE=1 SV=1	1656.89	5094.48	4679.77	3928.06	4480.38	4477.2	2570.11	225.598	1280.71	2493.05	1064.8	2094.6
786	tr|Q5EBC0|Q5EBC0_RAT	Inter alpha-trypsin inhibitor, heavy chain 4 OS=Rattus norvegicus OX=10116 GN=Itih4 PE=1 SV=1	8899.79	11933	12357.6	12727.2	12594.4	13256.6	6609.87	11473.5	5788.63	12760.3	18528.7	10167.5
787	sp|Q9R1T1|BAF_RAT	Barrier-to-autointegration factor OS=Rattus norvegicus OX=10116 GN=Banf1 PE=1 SV=1	72712.2	72784.5	81736.3	73754.8	77313.5	83373.4	24433.5	24410.6	19788	19307.1	26380.1	25096.2
788	sp|Q6IRK9|CBPQ_RAT	Carboxypeptidase Q OS=Rattus norvegicus OX=10116 GN=Cpq PE=1 SV=1	10027.7	11054.7	10669.5	14361.9	20754.8	13757.7	9491.16	13437.7	11150.7	13298.5	11411.4	12870.4
789	sp|P55770|NH2L1_RAT	NHP2-like protein 1 OS=Rattus norvegicus OX=10116 GN=Snu13 PE=2 SV=4	7151.5	7616.41	7065.1	13698.4	10278.8	7152.05	8948.45	11652.2	6913.68	10410.3	15044.2	10669.6
790	sp|P63255|CRIP1_RAT	Cysteine-rich protein 1 OS=Rattus norvegicus OX=10116 GN=Crip1 PE=1 SV=2	102250	54702.7	78254.4	36025.9	19314.7	28002	27794.1	70530	35305.8	42321.6	8387.94	20200
791	tr|Q5XIJ3|Q5XIJ3_RAT	Isocitrate dehydrogenase [NAD] subunit, mitochondrial OS=Rattus norvegicus OX=10116 GN=Idh3g PE=1 SV=1	1884.06	5587.85	10718.3	3342.48	2323.63	5293.7	761.476	357.769	1665.11	476.686	188.328	1013.35
792	sp|P14669|ANXA3_RAT	Annexin A3 OS=Rattus norvegicus OX=10116 GN=Anxa3 PE=1 SV=4	4399.59	15533.8	12724.1	13562.1	31247.6	22673.1	12354.2	2065.09	13990.6	14589.3	9184.28	22302.4
793	tr|D3ZRP6|D3ZRP6_RAT	AP-1 complex subunit mu-2 OS=Rattus norvegicus OX=10116 GN=Ap1m2 PE=3 SV=2	13281.1	9901.21	6839.51	5709.48	6815.27	6631.12	6656.95	9232.54	8990.23	9840.6	230.299	7215.2
794	tr|Q3ZAV2|Q3ZAV2_RAT	Y-box-binding protein 1 OS=Rattus norvegicus OX=10116 GN=Ybx1 PE=1 SV=1	4010.34	3259.71	5100.47	4259.53	2949.29	3366.04	5812.5	6773.83	3409	3665.76	4547.27	3893.16
795	tr|D3ZM69|D3ZM69_RAT	Erythrocyte membrane protein band 4.1-like 2 OS=Rattus norvegicus OX=10116 GN=Epb41l2 PE=1 SV=2	6851.18	7656.64	6205.02	7880.43	8343.55	8813.2	177.476	438.72	4857	6357.22	279.791	9857.88
796	tr|Q641Z9|Q641Z9_RAT	Succinate dehydrogenase cytochrome b560 subunit, mitochondrial OS=Rattus norvegicus OX=10116 GN=Sdhc PE=1 SV=1	17652.8	15301.6	11980.3	16808.4	8230.59	13971.1	8153.8	10685.5	14764.9	18478.6	4351.88	2909.38
797	tr|A0A140TAA4|A0A140TAA4_RAT	Programmed cell death 6-interacting protein OS=Rattus norvegicus OX=10116 GN=Pdcd6ip PE=1 SV=1	18706.6	18191.5	18178.7	17206.6	15483.9	14811.6	13491.9	23073.7	20183.4	13946.6	11432.3	14444.4
798	sp|P17078|RL35_RAT	60S ribosomal protein L35 OS=Rattus norvegicus OX=10116 GN=Rpl35 PE=1 SV=3	41123.8	34857.6	35535.3	35288.9	28805.2	37142.5	42274.6	46590.7	46478.9	34971.8	33985.3	25633.2
799	sp|P47728|CALB2_RAT	Calretinin OS=Rattus norvegicus OX=10116 GN=Calb2 PE=1 SV=1	3375.48	3976.85	4136.05	4951.49	6274.8	4408.75	2264.57	429.829	1834.37	1905.95	320.781	2999.21
800	tr|Q9JMB3|Q9JMB3_RAT	Erythrocyte membrane protein band 4.1-like 3 OS=Rattus norvegicus OX=10116 GN=Epb41l3 PE=1 SV=1	9875.17	4664.12	6453.17	4991.69	2334.53	3958.4	358.913	183.874	3956.43	503.232	1801.92	3533.21
801	sp|Q6TA48|MPTX_RAT	Mucosal pentraxin OS=Rattus norvegicus OX=10116 GN=Mptx1 PE=2 SV=1	41477.1	17441.7	8177.76	11393	11161.9	1802.82	13229.1	5250.21	8164.99	3781.43	2202.92	4821.58
802	sp|Q811X6|CRYL1_RAT	Lambda-crystallin homolog OS=Rattus norvegicus OX=10116 GN=Cryl1 PE=1 SV=3	3732.32	3127.97	3795.68	2860.68	2404.29	2201.88	397.221	353.103	243.79	223.454	448.351	249.899
803	sp|O08629|TIF1B_RAT	Transcription intermediary factor 1-beta OS=Rattus norvegicus OX=10116 GN=Trim28 PE=1 SV=2	4927.73	3795.37	3081.59	2237.51	1598.2	3206.49	3068.74	342.315	3444.98	3569.84	1194.78	1822.5
804	tr|D3ZD97|D3ZD97_RAT	RNA helicase OS=Rattus norvegicus OX=10116 GN=Dhx15 PE=1 SV=1	12162.1	8624.64	4918.07	7713.74	6588.05	5073.55	0	0	122.304	104.965	64.1448	160.595
805	sp|P38918|ARK73_RAT	Aflatoxin B1 aldehyde reductase member 3 OS=Rattus norvegicus OX=10116 GN=Akr7a3 PE=1 SV=2	16613.1	11765.2	4538.59	10466.5	5647.03	1539.47	145.441	116.139	237.74	170.576	502.435	1290.88
806	tr|Q6MGA0|Q6MGA0_RAT	MHC class II antigen OS=Rattus norvegicus OX=10116 GN=RT1-Ba PE=2 SV=1	9671.73	11642	11995.2	15207	16804.1	22408.4	13572.3	7170.41	9169.63	12599.5	15645.1	20536
807	tr|A0A0G2K8H0|A0A0G2K8H0_RAT	Caprin-1 OS=Rattus norvegicus OX=10116 GN=Caprin1 PE=1 SV=1	9710.94	10950.9	7489.32	12870.9	10894.4	12637.4	11391.7	13257.7	12736.1	9952.71	11148.3	8508.7
808	sp|Q2LAP6|TES_RAT	Testin OS=Rattus norvegicus OX=10116 GN=Tes PE=1 SV=1	15729.2	14796.9	649.241	1370.53	18908.3	14316.9	15984.2	20193.7	1005.09	18027.1	408.576	1388.59
809	sp|P54311|GBB1_RAT	Guanine nucleotide-binding protein G(I)/G(S)/G(T) subunit beta-1 OS=Rattus norvegicus OX=10116 GN=Gnb1 PE=1 SV=4	28110.8	26103.9	29102.1	20502.2	21841.2	25687.2	21707.6	31051	26041.5	22907.6	9960	19224.7
810	tr|Q6P685|Q6P685_RAT	Eukaryotic translation initiation factor 2 subunit beta OS=Rattus norvegicus OX=10116 GN=Eif2s2 PE=1 SV=1	6939.56	314.976	12904	9213.83	7701.16	6204.84	5733.4	1106.12	5984.1	7127.66	5285.21	7766.35
811	sp|P62718|RL18A_RAT	60S ribosomal protein L18a OS=Rattus norvegicus OX=10116 GN=Rpl18a PE=2 SV=1	21513.9	23754.5	19968.8	14068.6	12931	28345.9	21441.9	20248.7	24338.1	20743.4	9742.22	16790.2
812	tr|A0A0G2KB55|A0A0G2KB55_RAT	SUMO-conjugating enzyme UBC9-like OS=Rattus norvegicus OX=10116 GN=LOC102553386 PE=3 SV=1	3405.51	2831.75	4799.23	3068.93	4167.54	2172.49	3022.83	4019.17	2681.74	1800.07	3063.06	3807.62
813	tr|D4A746|D4A746_RAT	GDP-mannose pyrophosphorylase B OS=Rattus norvegicus OX=10116 GN=Gmppb PE=1 SV=1	1257.14	926.982	380.056	699.695	586.513	422	1299.78	2135.42	2247.55	1137.74	208.343	1445.37
814	tr|A0A0G2JYA4|A0A0G2JYA4_RAT	Serine/threonine-protein phosphatase OS=Rattus norvegicus OX=10116 GN=LOC100362453 PE=3 SV=1	11418.1	12001.6	12368.5	9706.19	10109.8	11902	242.104	1514.74	9246.75	5132.29	4951.43	10113.2
815	sp|P08011|MGST1_RAT	Microsomal glutathione S-transferase 1 OS=Rattus norvegicus OX=10116 GN=Mgst1 PE=1 SV=3	26348.1	16673.2	23272.7	12664.2	3989.32	16942.3	13014.7	20293.6	21889.2	13398.5	4245.31	6831.13
816	tr|G3V7Q8|G3V7Q8_RAT	Cationic trypsinogen OS=Rattus norvegicus OX=10116 GN=Prss3b PE=4 SV=1	63840.9	81181.7	42866.9	87555.1	61340.1	22134.2	22381.4	66339.9	78896	45368.9	44243.8	18626.9
817	tr|Q5BJN7|Q5BJN7_RAT	40S ribosomal protein S30 OS=Rattus norvegicus OX=10116 GN=LOC100360647 PE=1 SV=1	8624.4	8146.41	22289.4	8451.81	8129.31	21959.7	25861.9	15759.3	1046.76	20561.7	17171	16511.3
818	tr|G3V6B0|G3V6B0_RAT	Pyridoxal-dependent decarboxylase domain-containing 1 OS=Rattus norvegicus OX=10116 GN=Pdxdc1 PE=1 SV=1	14360.1	9303.57	10992.9	9639.99	7695	9192.15	539.118	7926.66	6557.8	10047.2	12638.5	8396.93
819	tr|G3V9N8|G3V9N8_RAT	AP complex subunit beta OS=Rattus norvegicus OX=10116 GN=Ap1b1 PE=1 SV=3	2341.16	1695.49	193.011	1003.01	226.602	90.6965	0	0	0	0	0	0
820	tr|B1WC50|B1WC50_RAT	Ewsr1 protein OS=Rattus norvegicus OX=10116 GN=Ewsr1 PE=1 SV=1	6205.16	3002.94	6136.79	4740.92	7064.23	6679.2	5886.18	6350.8	4566.32	5502.4	6029.5	6763.22
821	tr|G3V7E3|G3V7E3_RAT	Granzyme A OS=Rattus norvegicus OX=10116 GN=Gzma PE=1 SV=1	15828.6	9898.8	15734.6	5051.31	3630.37	2353.76	13572.1	14233.9	9447.79	5539.77	5807.06	2728.07
822	tr|F7ETL6|F7ETL6_RAT	Sm protein E OS=Rattus norvegicus OX=10116 PE=3 SV=2	20176	28097.5	16077.9	33832.8	32400	13009.5	119.504	8494.81	21170.4	16666.1	11048.3	19525.5
823	tr|F1LQ14|F1LQ14_RAT	60S ribosomal protein L34 OS=Rattus norvegicus OX=10116 GN=Rpl34 PE=3 SV=1	45581.7	43412.2	48275.8	33587.5	31324.9	45307.3	41615.5	53473.8	48275.1	42112.5	25178.4	38987.1
824	tr|Q5BJP4|Q5BJP4_RAT	RNA binding motif protein 39 OS=Rattus norvegicus OX=10116 GN=Rbm39 PE=1 SV=1	3940.64	1937.35	4377.56	6361.07	6372.51	4752.19	1562.15	1467.65	3099.45	2346.64	1760.01	4508.55
825	tr|F1M9I3|F1M9I3_RAT	Mucin-13 OS=Rattus norvegicus OX=10116 GN=Muc13 PE=4 SV=3	12173.4	3163.18	5181.3	1161.69	485.641	3817.77	318.834	6307.73	2275.55	2983.46	1103.21	1098.33
826	sp|Q9QYL8|LYPA2_RAT	Acyl-protein thioesterase 2 OS=Rattus norvegicus OX=10116 GN=Lypla2 PE=1 SV=1	11745.6	8360.55	6993.73	10687.3	8198.36	4220.71	3372.64	4064.21	2910.29	3973.46	676.404	3955.22
827	sp|P05943|S10AA_RAT	Protein S100-A10 OS=Rattus norvegicus OX=10116 GN=S100a10 PE=1 SV=2	88723.6	61248.3	151074	62321.3	73022.3	114707	110.937	1429.5	94058.8	71355.2	91483.8	67564.2
828	tr|A0A0G2K6S9|A0A0G2K6S9_RAT	Myosin-11 OS=Rattus norvegicus OX=10116 GN=Myh11 PE=1 SV=1	135888	233415	259135	79083.8	223060	124662	114595	116677	143749	183779	68303	199979
829	sp|P02770|ALBU_RAT	Albumin OS=Rattus norvegicus OX=10116 GN=Alb PE=1 SV=2	137267	12055.1	142894	98634.3	118172	168979	216031	113139	162307	115524	62747	136234
830	tr|D3Z7Y6|D3Z7Y6_RAT	Keratin, type I cytoskeletal 20 OS=Rattus norvegicus OX=10116 GN=Krt20 PE=1 SV=3	137003	14901.8	19715.6	27767.3	4121.16	13026	38128.8	47906.6	8815.54	18046.9	24172	11933.7
831	tr|A0A0G2JSW0|A0A0G2JSW0_RAT	Myosin regulatory light chain 12B OS=Rattus norvegicus OX=10116 GN=Myl12b PE=4 SV=1	4089.3	5919.19	2591.94	5405.2	5012.88	1764.19	2993.45	577.251	1176.93	1419.67	3308.07	3594.52
832	sp|P84245|H33_RAT	Histone H3.3 OS=Rattus norvegicus OX=10116 GN=H3-3b PE=1 SV=2	550.177	250.262	0	128.29	149.384	0	0	0	168.864	0	97.4401	0
833	sp|P62836|RAP1A_RAT	Ras-related protein Rap-1A OS=Rattus norvegicus OX=10116 GN=Rap1a PE=1 SV=1	11139.5	13421.6	12121.3	6321.8	8321.48	13776.8	8087.83	2066.45	11364.6	9533.73	5175.81	13015.8
834	tr|A0A0G2JV54|A0A0G2JV54_RAT	Polypyrimidine tract-binding protein 3 OS=Rattus norvegicus OX=10116 GN=Ptbp3 PE=1 SV=1	1364.22	7297.32	9598.26	10021	7652.68	7012.97	9159.57	7970.82	6646.19	7257.76	9589.21	7891.62
835	tr|D3ZXS8|D3ZXS8_RAT	E2 ubiquitin-conjugating enzyme OS=Rattus norvegicus OX=10116 GN=Ube2k PE=1 SV=1	8199.64	8296.62	8406.68	6674.55	8891.15	8306	1469.14	7270.89	8049.61	5233.67	6335.97	7403.63
836	tr|B0BN63|B0BN63_RAT	Activator of Hsp90 ATPase activity 1 OS=Rattus norvegicus OX=10116 GN=Ahsa1 PE=1 SV=1	7095.7	5839.17	1963.82	7438.62	5166.59	5227.91	187.14	210.03	228.61	197.427	245.322	108.849
837	tr|A0A0G2KA61|A0A0G2KA61_RAT	Casein kinase II subunit beta OS=Rattus norvegicus OX=10116 GN=Csnk2b PE=1 SV=1	8299.54	9302.36	7222.61	7427.48	9193.66	9716.92	2408.95	781.445	7753.04	8015.83	3927.72	8026.41
838	tr|Q5PQZ9|Q5PQZ9_RAT	NADH dehydrogenase [ubiquinone] 1 subunit C2 OS=Rattus norvegicus OX=10116 GN=Ndufc2 PE=1 SV=1	22268.8	15599.2	20610.5	12615.3	10464.7	17109.1	14831.2	15814.8	19443.1	15866.8	6629.83	14513.5
839	tr|B2RZD6|B2RZD6_RAT	NDUFA4, mitochondrial complex-associated OS=Rattus norvegicus OX=10116 GN=Ndufa4 PE=1 SV=1	19637.9	46950	26632.9	40299.9	73544	33574.2	41981.3	17960.7	21851.7	52628.4	34089.1	39160.8
840	tr|A0A0G2KAW7|A0A0G2KAW7_RAT	Eukaryotic translation initiation factor 4H OS=Rattus norvegicus OX=10116 GN=Eif4h PE=1 SV=1	16871.4	29200.6	15604.1	17581	31929.2	16844.5	14069.4	19495.8	17400.3	16290.4	17200.6	16003.1
841	sp|Q9ESH6|GLRX1_RAT	Glutaredoxin-1 OS=Rattus norvegicus OX=10116 GN=Glrx PE=3 SV=3	22619.5	13880.5	18395.8	14407.4	3767.44	6866.28	6206.26	10099.4	20154.1	7402.38	14852.2	8382.69
842	tr|A0A0G2K8V5|A0A0G2K8V5_RAT	C-reactive protein OS=Rattus norvegicus OX=10116 GN=Crp PE=1 SV=1	10705.7	15226.3	9449.14	7355.39	5911.43	9968.5	7313.3	419.627	10876.4	6628.13	3438.38	6857.65
843	tr|A0A0G2K7K2|A0A0G2K7K2_RAT	Apoptosis-inducing factor 1, mitochondrial OS=Rattus norvegicus OX=10116 GN=Aifm1 PE=1 SV=1	6672.27	4838.62	7937.48	8277.65	3061.72	297.406	3611.61	656.713	499.712	5010.53	1635.57	5295.52
844	tr|A0A0G2K737|A0A0G2K737_RAT	Thioredoxin-like protein 1 OS=Rattus norvegicus OX=10116 GN=Txnl1 PE=1 SV=1	9153.77	10811.3	12113.6	9806.28	11331.6	11235.4	10715.2	12625.6	8265.15	9073.7	779.875	8009.51
845	tr|Q4JEI8|Q4JEI8_RAT	Defensin alpha 6 OS=Rattus norvegicus OX=10116 GN=Defa6 PE=2 SV=1	10816.9	14851.4	15206.6	2356.69	3122.84	47472.6	6406.26	4103	12161.6	20599.5	6044.24	20426.8
846	tr|G3V647|G3V647_RAT	Pyridoxal kinase OS=Rattus norvegicus OX=10116 GN=Pdxk PE=1 SV=1	777.379	1816.66	2621.11	289.872	1706.22	1579.32	409.166	188.422	212.185	269.159	171.443	215.501
847	tr|F7DLY1|F7DLY1_RAT	EPS8-like 2 OS=Rattus norvegicus OX=10116 GN=Eps8l2 PE=1 SV=2	488.475	938.029	4959.88	5383.4	2074.53	2187.39	3512.03	5612.05	6157.82	1718.63	4097.44	942.73
848	tr|D4ADS4|D4ADS4_RAT	Microsomal glutathione S-transferase 3 OS=Rattus norvegicus OX=10116 GN=Mgst3 PE=1 SV=1	18979.8	11490.2	18258.6	217.058	2587.43	10538.1	13773.6	14098.5	20853.3	14380	4163.68	6223.62
849	tr|D4A2G9|D4A2G9_RAT	RAN-binding protein 1 OS=Rattus norvegicus OX=10116 GN=Ranbp1 PE=1 SV=1	14159.1	4539.93	11687.4	14320.3	11069.3	14257.2	8433.3	8447.54	9469.33	6565.14	12030.1	13429.2
850	tr|D3ZP47|D3ZP47_RAT	14 kDa phosphohistidine phosphatase OS=Rattus norvegicus OX=10116 GN=Phpt1 PE=1 SV=1	6113.14	6557.31	7090.19	8086.85	5334.03	7041.03	6911.88	10054.4	7319.7	5143.97	8160.09	5389.95
851	tr|D3ZMA5|D3ZMA5_RAT	Aromatic-L-amino-acid decarboxylase OS=Rattus norvegicus OX=10116 GN=Ddc PE=1 SV=2	4248.28	4491.68	4932.04	3582.71	2880.65	3099.55	3345.17	6579.41	5294.23	3260.43	1323.69	1805.92
852	tr|B5DEL8|B5DEL8_RAT	Complex I-15 kDa OS=Rattus norvegicus OX=10116 GN=Ndufs5 PE=1 SV=1	4220.65	9024.85	8705.3	6176.63	3761.84	9564.2	5223	4966.25	9777.48	8250.97	368.462	6303.26
853	tr|B2RZB7|B2RZB7_RAT	Small nuclear ribonucleoprotein Sm D1 OS=Rattus norvegicus OX=10116 GN=Snrpd1 PE=1 SV=1	20613.7	19186.3	22006.4	13864	12302.5	25249.3	17064.2	16819.3	18513.2	18536.3	7097.52	15509.4
854	tr|B0BNJ9|B0BNJ9_RAT	RCG44002, isoform CRA_a OS=Rattus norvegicus OX=10116 GN=Tmem14c PE=1 SV=1	4688.98	8284.18	17918.7	4388.46	337.786	5799.58	10244.2	6855.19	2651.08	13082.4	3402.17	14067
855	tr|A0A0G2JSL0|A0A0G2JSL0_RAT	Proteasome subunit beta OS=Rattus norvegicus OX=10116 GN=LOC100360846 PE=3 SV=1	3751.55	3264.39	3152.36	4553.09	2580.15	3913.29	3034.5	3952.56	3492.37	2791.7	1172.29	3477.67
856	tr|A0A0G2JSJ8|A0A0G2JSJ8_RAT	Alpha-L-fucosidase OS=Rattus norvegicus OX=10116 GN=Fuca1 PE=1 SV=1	8836.35	8555.38	9873.93	4103.92	5093.83	801.166	3783.21	5201	7966.9	5559.46	1617.39	6749.53
857	sp|Q9JHL4|DBNL_RAT	Drebrin-like protein OS=Rattus norvegicus OX=10116 GN=Dbnl PE=1 SV=1	1817.01	2419.26	4076.53	5761.44	5543.92	5680.92	197.26	187.585	1578.11	591.978	3769.54	1451.89
858	sp|Q62920|PDLI5_RAT	PDZ and LIM domain protein 5 OS=Rattus norvegicus OX=10116 GN=Pdlim5 PE=1 SV=2	11400.8	9333.44	11288.8	10777.6	8048.26	9339.64	8925.04	6287.39	6184.07	5462.37	8967.55	6514.26
859	sp|Q5U2Q3|CK054_RAT	Ester hydrolase C11orf54 homolog OS=Rattus norvegicus OX=10116 PE=1 SV=1	2012.15	1210.24	2115.01	3919.08	1841.3	1793.02	2631.01	3225.6	2683.94	1832.73	2557.23	1848.74
860	sp|Q5M9I5|QCR6_RAT	Cytochrome b-c1 complex subunit 6, mitochondrial OS=Rattus norvegicus OX=10116 GN=Uqcrh PE=3 SV=1	31238.8	35334.3	44411.3	36442.4	29611	32725.8	19953.2	22474.7	19752.3	25393.8	21352	30476
861	sp|Q00981|UCHL1_RAT	Ubiquitin carboxyl-terminal hydrolase isozyme L1 OS=Rattus norvegicus OX=10116 GN=Uchl1 PE=1 SV=2	1660.24	1733.2	1724.13	2426.13	1690.2	2042.1	1316.62	1575.78	1645.83	1638.54	2058.67	2448.95
862	sp|B0K025|OSTC_RAT	Oligosaccharyltransferase complex subunit OSTC OS=Rattus norvegicus OX=10116 GN=Ostc PE=2 SV=1	10250.8	8224.16	8801.89	4447.6	2790.8	11665.6	5129.43	6854.54	8011.09	7788.6	3441.2	4827.33
863	tr|F1M820|F1M820_RAT	Sorbin and SH3 domain-containing protein 1 OS=Rattus norvegicus OX=10116 GN=Sorbs1 PE=1 SV=1	5556.81	273.041	5910.92	1055.06	6690.33	2269.06	4173.76	5134.84	6731.43	7207.62	3126.84	6693.74
864	sp|P30919|ASPG_RAT	N(4)-(Beta-N-acetylglucosaminyl)-L-asparaginase OS=Rattus norvegicus OX=10116 GN=Aga PE=1 SV=2	296.181	14601.5	14191.8	12764.9	405.289	14225.9	11080.2	9608.61	5016.22	3734.89	4043.13	14802.3
865	sp|Q6AXT5|RAB21_RAT	Ras-related protein Rab-21 OS=Rattus norvegicus OX=10116 GN=Rab21 PE=2 SV=1	11671	10786.1	11495.5	9648.63	12129.7	7486.11	13972.8	13444.4	14149.3	14886.8	5850.67	11537.4
866	sp|P15791|KCC2D_RAT	Calcium/calmodulin-dependent protein kinase type II subunit delta OS=Rattus norvegicus OX=10116 GN=Camk2d PE=1 SV=1	5050.04	4586.09	2085.78	4169.94	5151.81	4691	3419.56	434.48	4551.36	3500.68	844.71	4889.07
867	tr|A0A140TAD1|A0A140TAD1_RAT	ADP-sugar pyrophosphatase OS=Rattus norvegicus OX=10116 GN=Nudt5 PE=1 SV=1	23005.6	12663.5	35661.8	18676.3	14794.2	23937.9	9880.64	23956.1	17284.4	11583	13888.7	11118.5
868	tr|A0A0A0MY49|A0A0A0MY49_RAT	Dynamin GTPase OS=Rattus norvegicus OX=10116 GN=Dnm2 PE=1 SV=2	24077.8	21841.7	18217.6	19981.4	21332.7	23439.9	24654.7	28228	19474	19477.9	15256.8	19337.3
869	tr|Q6P9X2|Q6P9X2_RAT	Signal peptidase complex catalytic subunit SEC11 OS=Rattus norvegicus OX=10116 GN=Sec11a PE=1 SV=1	5875.73	5419.41	4554.22	5467.15	5614.44	6420.16	6052.09	5464.48	8509.89	6124.73	2779.35	4397.45
870	tr|B5DEZ6|B5DEZ6_RAT	Glucosamine-6-phosphate isomerase OS=Rattus norvegicus OX=10116 GN=Gnpda2 PE=1 SV=1	6419.72	6255.42	7406.76	3789.53	5261.33	223.249	559.653	3917.27	5776.82	1215.04	2000.37	4767.36
871	tr|Q6TXE9|Q6TXE9_RAT	Prolyl-tRNA synthetase OS=Rattus norvegicus OX=10116 GN=Eprs PE=1 SV=1	3406.43	3715.34	6549.3	4240.24	4210.2	4480.39	1858.73	480.656	1363.71	150.283	1502	3400.71
872	tr|M0R8J8|M0R8J8_RAT	Carboxylic ester hydrolase OS=Rattus norvegicus OX=10116 PE=3 SV=2	10662.5	8035.69	13982.9	4027.64	4085.93	7543.87	7252.77	15503	11714	4534.04	2126.86	4940.7
873	tr|D3ZVU7|D3ZVU7_RAT	Histone deacetylase 1 OS=Rattus norvegicus OX=10116 GN=Hdac1l PE=3 SV=3	14368.8	18657.4	11132.5	11745.3	9935.5	19430.6	12262	12059.7	19856.4	17199.7	1410.95	16771.5
874	tr|A0A0G2JYW3|A0A0G2JYW3_RAT	Clathrin light chain OS=Rattus norvegicus OX=10116 GN=Clta PE=1 SV=1	25795.6	17769.1	31244	22792	17484.1	16048.5	31279.9	38174	19870.5	21944.4	29394.3	41998.3
875	tr|D4AC36|D4AC36_RAT	Eukaryotic translation initiation factor 3 subunit F OS=Rattus norvegicus OX=10116 GN=Eif3f PE=1 SV=3	6870.9	6842.1	5906.56	5562.23	8872.42	1495.66	2364.66	1210.55	5248.61	4632.03	3328.81	4023.5
876	sp|Q9R0T4|CADH1_RAT	Cadherin-1 OS=Rattus norvegicus OX=10116 GN=Cdh1 PE=1 SV=1	18214.2	10987.3	22129.1	17925.1	7447.78	12336.7	2398.05	13568.4	11086.1	8872.88	5672.39	8018.02
877	sp|Q6AXS3|DEK_RAT	Protein DEK OS=Rattus norvegicus OX=10116 GN=Dek PE=1 SV=1	8136.53	2676.63	6983.38	6148.62	8754.1	10076.5	3866.01	3118.17	7599.52	7728	4109.7	9965.05
878	sp|Q6AYK6|CYBP_RAT	Calcyclin-binding protein OS=Rattus norvegicus OX=10116 GN=Cacybp PE=1 SV=1	255.821	6455.88	5018.24	696.226	4898.27	5835.15	5817.62	7367.87	6454.92	5995.76	2977.83	5224.52
879	sp|Q63396|TCP4_RAT	Activated RNA polymerase II transcriptional coactivator p15 OS=Rattus norvegicus OX=10116 GN=Sub1 PE=1 SV=3	37741.7	28690.6	18508	33244.4	32690.4	15749.1	32908.5	37974.8	34566.1	26842.1	26420.6	35464.4
880	tr|D3ZGQ3|D3ZGQ3_RAT	Adipocyte plasma membrane-associated protein OS=Rattus norvegicus OX=10116 GN=Apmap PE=1 SV=3	3935.22	24002.9	25908.6	16268.8	46075.1	6633.85	796.802	272.437	5164.89	6314.82	1986.11	53218
881	tr|A0A0G2K273|A0A0G2K273_RAT	Eukaryotic translation initiation factor 3 subunit E OS=Rattus norvegicus OX=10116 GN=LOC100909481 PE=3 SV=1	10173	8793.56	1523.57	5579.88	9123.44	8175	238.271	231.5	6764.13	7424.78	10172.1	7357.75
882	sp|Q68FX0|IDH3B_RAT	Isocitrate dehydrogenase [NAD] subunit beta, mitochondrial OS=Rattus norvegicus OX=10116 GN=Idh3B PE=2 SV=1	7375.34	5414.98	3000.3	6042.11	4968.55	4588.34	6974.34	5744.43	6967.64	430.046	3248.11	4736.16
883	sp|Q921A4|CYGB_RAT	Cytoglobin OS=Rattus norvegicus OX=10116 GN=Cygb PE=1 SV=1	5897.39	8888.16	4123.04	9728.84	12132.8	5265.12	9853.11	6995.75	7024.01	9271.84	12283.9	9854.53
884	sp|Q63357|MYO1D_RAT	Unconventional myosin-Id OS=Rattus norvegicus OX=10116 GN=Myo1d PE=1 SV=3	21062.4	13310.3	16907.3	12191.6	7346.2	10148.1	14986.6	19698.8	16126.4	17864.1	5249.68	6964.51
885	tr|B2RYP4|B2RYP4_RAT	Sorting nexin-2 OS=Rattus norvegicus OX=10116 GN=Snx2 PE=1 SV=1	6412.33	5651.11	7070.92	8394.07	8292.78	6688.85	6550.79	7290.1	6661.46	8368.57	10798.8	10366.2
886	tr|F1LMQ4|F1LMQ4_RAT	Phospholipase A(2) OS=Rattus norvegicus OX=10116 GN=Pla2g4c PE=4 SV=3	13688.4	7323.1	9375.3	8639.34	6066.6	3446.95	6983.57	2372.45	410.565	4523.28	4903.11	653.541
887	tr|B1H227|B1H227_RAT	LOC682908 protein OS=Rattus norvegicus OX=10116 GN=Rcc1 PE=1 SV=1	5516.42	5066.56	5259.15	4815.48	4590.56	3606.79	4852.99	4701.36	4203.93	5657.99	1800.78	4058.69
888	tr|Q5U2S7|Q5U2S7_RAT	Proteasome (Prosome, macropain) 26S subunit, non-ATPase, 3 OS=Rattus norvegicus OX=10116 GN=Psmd3 PE=1 SV=1	5991.41	5624.29	5241.93	2640.7	582.631	5608.76	4654.93	6372.27	5537.18	3837.33	2957.18	2324.27
889	tr|B2GVB9|B2GVB9_RAT	Fermitin family member 3 OS=Rattus norvegicus OX=10116 GN=Fermt3 PE=1 SV=1	3668.37	3305.76	2562.71	10210.8	951.863	5580.67	12058.9	6439.55	14339.5	10855.1	2524.08	7892.54
890	tr|A0A0G2K1F3|A0A0G2K1F3_RAT	Coatomer subunit gamma OS=Rattus norvegicus OX=10116 GN=Copg1 PE=1 SV=1	17565.7	12756.2	8937.17	15164.9	13901.4	15168.8	9411.77	9987.13	8869.31	8805.33	2575.43	7130.58
891	tr|D4A133|D4A133_RAT	H(+)-transporting two-sector ATPase OS=Rattus norvegicus OX=10116 GN=Atp6v1a PE=1 SV=1	18453.7	17679.8	18398.2	12977.8	13610.7	14232.2	11619.3	14553.5	15134.8	14820.1	8805.21	14141.3
892	tr|A0A140TAJ3|A0A140TAJ3_RAT	Far upstream element-binding protein 1 OS=Rattus norvegicus OX=10116 GN=Fubp1 PE=1 SV=1	9439.17	20583.4	1208.69	5127.6	9975.13	11577.6	7350.61	18389.7	12573.5	9191.4	14906.4	3015.62
893	tr|Q5RKJ9|Q5RKJ9_RAT	RAB10, member RAS oncogene family OS=Rattus norvegicus OX=10116 GN=Rab10 PE=1 SV=1	3278.23	2969.44	931.484	2147.59	1947.32	3258.84	5441.22	6818.39	1265.6	747.282	460.714	3165.69
894	tr|D4A3V2|D4A3V2_RAT	NADH dehydrogenase [ubiquinone] 1 alpha subcomplex subunit 6 OS=Rattus norvegicus OX=10116 GN=Ndufa6 PE=1 SV=1	27041	27540.7	23304.8	13452.2	21630	17535.3	22365.8	36629.8	15022.1	24636.7	21662.9	20154.4
895	sp|P19643|AOFB_RAT	Amine oxidase [flavin-containing] B OS=Rattus norvegicus OX=10116 GN=Maob PE=1 SV=3	6940.42	8127.21	8919.22	5291.54	4658.41	5263.18	7685.48	10631.8	7292.18	9544.62	2722.01	5393.5
896	tr|D4A834|D4A834_RAT	Proteoglycan 3 (Predicted) OS=Rattus norvegicus OX=10116 GN=Prg3 PE=4 SV=1	3588.34	4614.66	3582.08	2360.16	3581.56	13501.3	78.7553	1414.12	3371.12	5905.93	506.251	7968.74
897	sp|P18211|HB2D_RAT	Rano class II histocompatibility antigen, D-1 beta chain OS=Rattus norvegicus OX=10116 GN=RT1-Db1 PE=2 SV=1	33340.8	20553.7	21435	40551	33763.9	34691.7	24936.6	16131.5	29045.7	29740.4	21468.8	29666.7
898	tr|M0RCV0|M0RCV0_RAT	Serine-threonine kinase receptor-associated protein-like OS=Rattus norvegicus OX=10116 GN=LOC100910575 PE=4 SV=1	10318.6	8175.45	6155.9	2649.33	5686.69	22759.2	9640.37	21407.7	5290.89	22367.5	5337.5	6089.54
899	tr|F1LND7|F1LND7_RAT	Farnesyl pyrophosphate synthase OS=Rattus norvegicus OX=10116 GN=Fdps PE=1 SV=3	24230.7	19161	18992.9	34335.8	14930.7	15785.8	16469	29242.6	23898.7	13418.9	13969.8	8949.09
900	sp|Q66H98|CAVN2_RAT	Caveolae-associated protein 2 OS=Rattus norvegicus OX=10116 GN=Cavin2 PE=1 SV=3	10942.5	13930.2	12740.1	8743.82	9193.15	9695.51	8918.82	15941.1	14124.3	12614.7	11553.5	9897.58
901	sp|Q923W4|HDGR3_RAT	Hepatoma-derived growth factor-related protein 3 OS=Rattus norvegicus OX=10116 GN=Hdgfl3 PE=1 SV=1	2601.91	5388.59	6670.86	4395.11	6875.3	787.993	2080.61	3054.24	5904.44	6740.55	7679.71	9156.82
902	tr|A0A0G2JST3|A0A0G2JST3_RAT	Cytokeratin-1 OS=Rattus norvegicus OX=10116 GN=Krt1 PE=1 SV=1	2726.96	7863.96	5489.78	5920.95	257.255	5205.09	2145.28	270.44	4622.53	4709.1	5272.61	2224.52
903	tr|A0A0G2K9V6|A0A0G2K9V6_RAT	Threonyl-tRNA synthetase OS=Rattus norvegicus OX=10116 GN=Tars PE=1 SV=1	11939	9894.71	9094.78	3717.87	5090.59	8486.97	7133.99	8595.32	7913.02	6533.15	855.554	4527.59
904	sp|Q6JE36|NDRG1_RAT	Protein NDRG1 OS=Rattus norvegicus OX=10116 GN=Ndrg1 PE=1 SV=1	3903.59	9470.97	5963.75	15726.3	9783.42	816.018	2349.82	2104.3	839.216	1937.78	2043.27	1447.01
905	tr|M0R5Y9|M0R5Y9_RAT	Protein archease OS=Rattus norvegicus OX=10116 GN=Zbtb8os PE=1 SV=1	3251.63	2017.81	4198.18	3764.7	2341.9	3653.46	3361.75	3252.05	3444.67	3113.31	433.296	1207.22
906	tr|A0A0G2K8P3|A0A0G2K8P3_RAT	E3 ubiquitin-protein ligase OS=Rattus norvegicus OX=10116 GN=Nedd4 PE=1 SV=1	16781.4	23311.7	19005.7	16771.6	19847.4	18611.8	11630.4	5517.25	3476.73	9869.2	8150.06	8923.64
907	tr|A0A0G2JVX7|A0A0G2JVX7_RAT	Apolipoprotein A-IV OS=Rattus norvegicus OX=10116 GN=Apoa4 PE=1 SV=1	3327.3	2305.7	1532.43	2749.31	874.912	1939.1	2614.7	909.893	2511.2	1985.66	3848.35	614.296
908	sp|Q9JIK1|CDHR5_RAT	Cadherin-related family member 5 OS=Rattus norvegicus OX=10116 GN=Cdhr5 PE=1 SV=1	5133.07	2351.53	4314.04	3825.41	412.932	2049.72	1254.9	5879.87	4365.73	1394.71	270.613	495.133
909	tr|B5DFH4|B5DFH4_RAT	3'-phosphoadenosine-5'-phosphosulfate synthase OS=Rattus norvegicus OX=10116 GN=Papss2 PE=1 SV=1	615.788	1775.64	1456.64	1073.72	3170.51	350.345	569.145	749.943	1259.95	1104.7	398.468	1346.53
910	sp|G3V7W1|PDCD6_RAT	Programmed cell death protein 6 OS=Rattus norvegicus OX=10116 GN=Pdcd6 PE=2 SV=1	23037.5	25604.6	23840.2	27347.5	14828.9	14056.5	22658	30461.1	19968.3	22395	30357.8	16251.8
911	sp|P63322|RALA_RAT	Ras-related protein Ral-A OS=Rattus norvegicus OX=10116 GN=Rala PE=1 SV=1	15228.4	13274.4	14701.3	10424.7	10461.6	16211	12190.7	16066.9	16145.9	13176.7	6857.68	12863.9
912	tr|F1MAB9|F1MAB9_RAT	Tumor protein D52 OS=Rattus norvegicus OX=10116 GN=Tpd52 PE=1 SV=2	12138.3	8814.06	9771.58	11516.8	6296.81	4298.66	9903.69	8235.64	7289.9	7864.5	13802.2	7360.64
913	tr|G3V9T9|G3V9T9_RAT	Tyrosine-protein phosphatase non-receptor type OS=Rattus norvegicus OX=10116 GN=Ptpn6 PE=1 SV=1	4207.45	5600.76	1460.15	2607.87	1274.25	1879.37	4945.78	1291.12	3874.79	5038.02	15356.8	4589.76
914	tr|D3ZTB5|D3ZTB5_RAT	S100 calcium-binding protein A13 OS=Rattus norvegicus OX=10116 GN=S100a13 PE=1 SV=2	6027.86	13573	11086	8850.74	9570	9596.05	13783.4	11938.8	9997.42	8344.13	10576.6	12596.7
915	tr|Q4KLI7|Q4KLI7_RAT	Splicing factor 3a, subunit 3 OS=Rattus norvegicus OX=10116 GN=Sf3a3 PE=1 SV=1	5880.04	3888.35	4056.11	3246.33	3554.38	316.119	3556.13	1661.58	756.251	2135.37	6304.14	5032.05
916	sp|P62076|TIM13_RAT	Mitochondrial import inner membrane translocase subunit Tim13 OS=Rattus norvegicus OX=10116 GN=Timm13 PE=3 SV=1	6525.79	8400.22	9404.45	6804.74	9779.1	9186.02	5906.62	7285.3	2888.01	5939.34	10352	6683.87
917	tr|D4A6C5|D4A6C5_RAT	Rho GTPase-activating protein 1 OS=Rattus norvegicus OX=10116 GN=Arhgap1 PE=1 SV=1	7666.14	7834.61	7192.24	7433.13	6394.13	7828.71	7330.59	7756.87	8852.49	5684.54	7626.52	8474.32
918	tr|A0A0G2K121|A0A0G2K121_RAT	Unc-119 lipid-binding chaperone B OS=Rattus norvegicus OX=10116 GN=Mlec PE=1 SV=1	18470.4	24241.2	21637.4	14581.8	11941.2	23030.5	16881.1	17498.7	22278.7	20063.5	4324.57	12902.5
919	tr|B0K010|B0K010_RAT	Thioredoxin domain-containing protein 17 OS=Rattus norvegicus OX=10116 GN=Txndc17 PE=1 SV=1	38553.7	32447.3	32997.7	44824.2	24590.3	32068.8	30461.4	45405.8	31829.7	23482.1	34379.7	21585.3
920	tr|Q6TUD3|Q6TUD3_RAT	LRRGT00111 OS=Rattus norvegicus OX=10116 GN=Rdh11 PE=1 SV=1	5883.46	5669.42	5860.54	1624.48	2762.84	4695.25	5020.89	3995.55	5195.32	5975.8	1887.93	2837.07
921	sp|Q91V33|KHDR1_RAT	KH domain-containing, RNA-binding, signal transduction-associated protein 1 OS=Rattus norvegicus OX=10116 GN=Khdrbs1 PE=1 SV=1	6875.47	6090.34	4219.09	6894.71	6875.7	4262.48	6328.22	4984.62	9042.01	188.228	7463.02	4480.42
922	tr|Q66HK3|Q66HK3_RAT	Cyclooxygenase-1 OS=Rattus norvegicus OX=10116 GN=Ptgs1 PE=1 SV=1	21175.2	27062.1	24626.1	23341.8	28202.6	25722.3	13595.6	20106.5	19031.3	25266.3	15441.8	25904.7
923	sp|Q07009|CAN2_RAT	Calpain-2 catalytic subunit OS=Rattus norvegicus OX=10116 GN=Capn2 PE=1 SV=3	30413.7	32957.8	20602.4	16361.1	17060.6	14691.7	11113.6	17862.8	15035.5	16637	6509.86	22017
924	sp|Q568Z6|IST1_RAT	IST1 homolog OS=Rattus norvegicus OX=10116 GN=Ist1 PE=2 SV=1	9785.18	6195.97	6969.64	6182.11	2881.88	679.812	5704.21	4837.54	5074.79	417.438	6603.7	3541.31
925	sp|Q5XIF6|TBA4A_RAT	Tubulin alpha-4A chain OS=Rattus norvegicus OX=10116 GN=Tuba4a PE=1 SV=1	10833.9	7217.29	9005.92	8913.55	5218.04	6701.7	8474.7	8127.52	6574.66	5474.31	674.703	4463.4
926	sp|P61751|ARF4_RAT	ADP-ribosylation factor 4 OS=Rattus norvegicus OX=10116 GN=Arf4 PE=2 SV=2	9686.98	8137.32	8896.68	6160.74	4807.37	7735.09	8226.33	8773.97	7801.08	9170.8	4124.41	6976.01
927	tr|D3ZUX5|D3ZUX5_RAT	MICOS complex subunit OS=Rattus norvegicus OX=10116 GN=Chchd3 PE=1 SV=1	10987.4	8594.62	9990.94	11131.2	7898.13	6807.3	9100.21	13812.3	8569.85	9960.84	11074.9	8126.37
928	tr|Q5U214|Q5U214_RAT	U1 small nuclear ribonucleoprotein A OS=Rattus norvegicus OX=10116 GN=Snrpa PE=1 SV=1	8433.13	6945.54	7432.7	10809.2	9990.65	8651.96	1399.21	8200.15	9314.47	5327.63	8303.12	7626.67
929	tr|G3V7G9|G3V7G9_RAT	Eukaryotic translation initiation factor 3, subunit 6 interacting protein OS=Rattus norvegicus OX=10116 GN=Eif3l PE=1 SV=2	4701.86	4714.67	2725.94	3682.02	2637.34	1187.02	3753.54	5493.91	5717.29	302.665	1636.29	2751.59
930	tr|F1M1A6|F1M1A6_RAT	Similar to potassium channel tetramerisation domain-containing 12b OS=Rattus norvegicus OX=10116 GN=LOC681355 PE=1 SV=2	4165.19	5433.88	3885.84	3957.84	5522.54	5427.99	2331.65	5919.76	4661.07	5000.85	1244.73	4057.24
931	tr|M0RDI5|M0RDI5_RAT	Calcium uniporter protein OS=Rattus norvegicus OX=10116 GN=Mcu PE=1 SV=1	24031.5	17369	11610.3	7682.52	8306.51	11582.9	17971.9	25205.9	23424.2	19265	5093.18	13656
932	tr|F1LN42|F1LN42_RAT	Tensin 1 OS=Rattus norvegicus OX=10116 GN=Tns1 PE=1 SV=2	4231.82	6517.01	3624.38	6020.36	6209.46	5148.57	5714.87	5692.08	5415.83	5530.55	2956.7	5539.55
933	tr|F1M0X6|F1M0X6_RAT	Mago homolog B, exon junction complex subunit OS=Rattus norvegicus OX=10116 GN=Magohb PE=3 SV=2	6516.79	7142.54	5861.87	7530.84	3149.12	612.172	2502.19	6881.8	5415.01	4095.23	3129.95	4674.05
934	sp|P23514|COPB_RAT	Coatomer subunit beta OS=Rattus norvegicus OX=10116 GN=Copb1 PE=1 SV=1	13418.2	11404.7	9630.36	14802	11254.7	11045.1	622.704	7790.49	4364.87	4763.22	6747.78	7931.3
935	tr|D3ZFX4|D3ZFX4_RAT	Phosphoacetylglucosamine mutase OS=Rattus norvegicus OX=10116 GN=Pgm3 PE=1 SV=1	3073.36	744.703	3873.1	2890	2834.65	1202.62	3993.69	6965.89	861.213	1139.58	1395.95	1924.82
936	sp|P97521|MCAT_RAT	Mitochondrial carnitine/acylcarnitine carrier protein OS=Rattus norvegicus OX=10116 GN=Slc25a20 PE=1 SV=1	7831.73	6842.75	8282.44	8350.58	6182.39	7856.08	9786.03	9924.73	7454.33	9074.24	8248.69	6927.51
937	sp|Q4G061|EIF3B_RAT	Eukaryotic translation initiation factor 3 subunit B OS=Rattus norvegicus OX=10116 GN=Eif3b PE=1 SV=1	16685.1	21152.5	16023.8	10926.2	9091.02	13641.4	7268.17	14639.8	16106.1	11557.2	4533.33	13658.5
938	sp|Q6P742|PLP2_RAT	Proteolipid protein 2 OS=Rattus norvegicus OX=10116 GN=Plp2 PE=2 SV=1	2468.21	1718.43	1840.21	2048.44	1814.65	3088.7	2874.75	1380.87	2754.54	4558.84	2183.55	2093.4
939	sp|Q63083|NUCB1_RAT	Nucleobindin-1 OS=Rattus norvegicus OX=10116 GN=Nucb1 PE=1 SV=1	5815.58	6170.16	6664.04	6939.62	5382.87	4708.55	6721.04	7086.98	7595.85	1629.36	7518.16	6080.26
940	sp|P62193|PRS4_RAT	26S proteasome regulatory subunit 4 OS=Rattus norvegicus OX=10116 GN=Psmc1 PE=1 SV=1	707.739	5737.72	8480.26	8600.26	6248.49	6990.86	6965.66	8116.98	6393.26	5975.77	7248.18	6803.1
941	tr|A0A0G2K739|A0A0G2K739_RAT	Ubiquitin-conjugating enzyme E2 D3 OS=Rattus norvegicus OX=10116 GN=Ube2d3 PE=1 SV=1	9027.36	12685.1	6579.37	18337.9	22099.4	6305.38	13485.7	9943.5	6686.27	13675.8	16114.3	8345.51
942	tr|E9PT30|E9PT30_RAT	Intelectin 1 OS=Rattus norvegicus OX=10116 GN=Itln1 PE=4 SV=1	29357.6	23668	14842.1	7912.23	7734.28	3148.14	18425.7	5144	18332.5	17272.5	589.469	1221.49
943	sp|Q05982|NDKA_RAT	Nucleoside diphosphate kinase A OS=Rattus norvegicus OX=10116 GN=Nme1 PE=1 SV=1	16822.9	19951.6	14019.5	19699.8	11798.2	7239.92	9826.94	20266.4	14940.3	11251.2	16269.8	1023.91
944	tr|D4A885|D4A885_RAT	ATP-binding cassette subfamily A member 13 OS=Rattus norvegicus OX=10116 GN=Abca13 PE=4 SV=3	7147	3138.05	5540.26	7348.34	4273.75	3592.73	55746.7	58698.1	30641.1	19258.1	8729	16462.2
945	tr|D3ZAN2|D3ZAN2_RAT	Cadherin-related family member 2 OS=Rattus norvegicus OX=10116 GN=Cdhr2 PE=1 SV=1	6794.77	4168.83	12214.4	3920.18	706.195	2822.52	447.066	917.256	1695.93	1252.78	3749.37	1723.69

## Sheet: GSE vs Control
Supplementary Data 2. Differentially represented proteins in response to GSE supplementation (pvalue<0,05)					Control	GSE						GSE/Control
Row	Peak Name	Group	t-value	p-value	Mean 1	Mean 2	Median 1	Median 2	Sigma 1	Sigma 2	Delta	Fold Change	Log2 (Fold Change)
1	tr|D4A885|D4A885_RAT	ATP-binding cassette subfamily A member 13 OS=Rattus norvegicus OX=10116 GN=Abca13 PE=4 SV=3	-3.05768	0.01209	5173.35	31589.2	4907	24949.6	1800.59	21084.8	-26415.8	6.10613	2.61026	Over represented
2	tr|Q642E2|Q642E2_RAT	60S ribosomal protein L28 OS=Rattus norvegicus OX=10116 GN=Rpl28 PE=2 SV=1	-3.53438	0.00541	14673.4	28560.4	15323.7	28186.9	1603.85	9489.78	-13887	1.94641	0.960813
3	sp|P97541|HSPB6_RAT	Heat shock protein beta-6 OS=Rattus norvegicus OX=10116 GN=Hspb6 PE=1 SV=1	-6.58664	6.181e-05	8353.27	16236.2	8126.75	15937.9	2356.42	1743.95	-7882.94	1.9437	0.958802
4	sp|P43138|APEX1_RAT	DNA-(apurinic or apyrimidinic site) endonuclease OS=Rattus norvegicus OX=10116 GN=Apex1 PE=1 SV=2	-3.35305	0.00733	6174.61	11760.4	6072.78	13290.4	1092.04	3931.7	-5585.76	1.90463	0.929513
5	tr|F1LS40|F1LS40_RAT	Collagen alpha-2(I) chain OS=Rattus norvegicus OX=10116 GN=Col1a2 PE=1 SV=3	-2.37437	0.03899	253317	465613	261944	473161	117857	184597	-212295	1.83806	0.878184
6	tr|A0A0G2K151|A0A0G2K151_RAT	Apolipoprotein E OS=Rattus norvegicus OX=10116 GN=Apoe PE=1 SV=1	-2.38624	0.0382	19797.7	31213.6	19218.9	30543	4583.65	10784.8	-11415.9	1.57662	0.656839
7	sp|P11951|CX6C2_RAT	Cytochrome c oxidase subunit 6C-2 OS=Rattus norvegicus OX=10116 GN=Cox6c2 PE=1 SV=3	-3.64069	0.00453	76995.3	116772	76075.9	115889	15159.9	22054.3	-39776.8	1.51661	0.600853
8	tr|D3ZLY9|D3ZLY9_RAT	Histone H2B OS=Rattus norvegicus OX=10116 GN=Hist1h2bh PE=3 SV=2	-4.30517	0.00155	3.85998e+07	5.38134e+07	3.8347e+07	5.25254e+07	5.5452e+06	6.64657e+06	-1.52136e+07	1.39414	0.479372
9	tr|B2RYS2|B2RYS2_RAT	Cytochrome b-c1 complex subunit 7 OS=Rattus norvegicus OX=10116 GN=Uqcrb PE=1 SV=1	-3.44405	0.00629	67009.1	87341.7	66661.1	87831.8	11923.4	8182.5	-20332.6	1.30343	0.382315
10	sp|P0DP31|CALM3_RAT	Calmodulin-3 OS=Rattus norvegicus OX=10116 GN=Calm3 PE=1 SV=1	-2.24919	0.04825	157940	204904	150007	201567	43410.6	27046.3	-46964.2	1.29735	0.375573
11	sp|P09495|TPM4_RAT	Tropomyosin alpha-4 chain OS=Rattus norvegicus OX=10116 GN=Tpm4 PE=1 SV=3	-2.3118	0.04337	30441.8	38225.2	29867.3	39467.5	3855.4	7290.23	-7783.34	1.25568	0.328468
12	tr|D3ZFQ8|D3ZFQ8_RAT	Cytochrome c-1 OS=Rattus norvegicus OX=10116 GN=Cyc1 PE=1 SV=3	-2.23227	0.04965	157585	185069	154764	183859	20835.9	21804.9	-27484.8	1.17441	0.23194
13	sp|B0K020|CISD1_RAT	CDGSH iron-sulfur domain-containing protein 1 OS=Rattus norvegicus OX=10116 GN=Cisd1 PE=3 SV=1	-2.23015	0.04983	29677.7	34266	30017.6	34673	2989.81	4056.75	-4588.21	1.1546	0.207394
1	tr|F1M953|F1M953_RAT	75 kDa glucose-regulated protein OS=Rattus norvegicus OX=10116 GN=Hspa9 PE=1 SV=1	2.57164	0.02781	203831	175731	206051	176872	16410.9	21144.5	28100.6	0.862138	-0.21401	Under represented
2	tr|G3V8A5|G3V8A5_RAT	Vacuolar protein sorting-associated protein 35 OS=Rattus norvegicus OX=10116 GN=Vps35 PE=1 SV=1	2.25451	0.04781	51581.6	44079.2	51492.4	43531.1	5761.78	5765.93	7502.48	0.854551	-0.226761
3	sp|O88989|MDHC_RAT	Malate dehydrogenase, cytoplasmic OS=Rattus norvegicus OX=10116 GN=Mdh1 PE=1 SV=3	2.7715	0.01974	323621	274052	321188	269025	24582.6	36263.1	49569.3	0.846829	-0.239857
4	sp|P97536|CAND1_RAT	Cullin-associated NEDD8-dissociated protein 1 OS=Rattus norvegicus OX=10116 GN=Cand1 PE=1 SV=1	2.51271	0.03077	36004.9	30346.6	35640.4	30071.7	4510.5	3175.12	5658.34	0.842846	-0.24666
5	tr|A0A140TAI3|A0A140TAI3_RAT	Heterogeneous nuclear ribonucleoprotein C, isoform CRA_b OS=Rattus norvegicus OX=10116 GN=Hnrnpc PE=1 SV=1	3.04866	0.01228	37071.2	31175.8	37267.3	30930.5	2472.02	4040.53	5895.41	0.840971	-0.249872
6	tr|G3V6S0|G3V6S0_RAT	Spectrin beta chain OS=Rattus norvegicus OX=10116 GN=Sptbn1 PE=1 SV=3	2.36845	0.03938	95890.1	80386.7	98362.9	84567.8	12206.6	10396.4	15503.4	0.838321	-0.254426
7	tr|Q5U328|Q5U328_RAT	Nucleolin OS=Rattus norvegicus OX=10116 GN=Ncl PE=1 SV=1	3.05382	0.01217	162285	135963	160212	140850	6227.05	20174	26322.1	0.837803	-0.255317
8	sp|A7VJC2|ROA2_RAT	Heterogeneous nuclear ribonucleoproteins A2/B1 OS=Rattus norvegicus OX=10116 GN=Hnrnpa2b1 PE=1 SV=1	2.46151	0.03359	347652	288183	362705	296119	42719.6	40952.1	59468.5	0.828942	-0.270656
9	sp|Q07936|ANXA2_RAT	Annexin A2 OS=Rattus norvegicus OX=10116 GN=Anxa2 PE=1 SV=2	2.30871	0.0436	515626	423175	526655	440451	79636.5	57266	92451.1	0.820701	-0.285071
10	sp|P14408|FUMH_RAT	Fumarate hydratase, mitochondrial OS=Rattus norvegicus OX=10116 GN=Fh PE=1 SV=2	2.71009	0.02193	46927.7	38352.9	45677.6	37589.9	5945.22	4971.96	8574.79	0.817277	-0.291104
11	sp|P00507|AATM_RAT	Aspartate aminotransferase, mitochondrial OS=Rattus norvegicus OX=10116 GN=Got2 PE=1 SV=2	4.10594	0.00212	229023	185714	226916	185197	18557.1	17977.8	43309.7	0.810894	-0.302415
12	sp|Q63413|DX39B_RAT	Spliceosome RNA helicase Ddx39b OS=Rattus norvegicus OX=10116 GN=Ddx39b PE=2 SV=3	2.57836	0.02749	172078	138080	167271	151411	16507.8	27761	33997.5	0.80243	-0.317553
13	tr|Q66HK3|Q66HK3_RAT	Cyclooxygenase-1 OS=Rattus norvegicus OX=10116 GN=Ptgs1 PE=1 SV=1	2.23694	0.04926	25021.7	19891	25174.2	19568.9	2551.34	5005.42	5130.64	0.794952	-0.33106
14	sp|P48500|TPIS_RAT	Triosephosphate isomerase OS=Rattus norvegicus OX=10116 GN=Tpi1 PE=1 SV=2	2.33951	0.04137	291926	231198	293994	250663	38608.2	50519.2	60728	0.791975	-0.336474
15	tr|G3V9U2|G3V9U2_RAT	3-ketoacyl-CoA thiolase, mitochondrial OS=Rattus norvegicus OX=10116 GN=Acaa2 PE=1 SV=3	3.41294	0.00663	65870.1	51938.2	66411.3	53423.9	6513.42	7586.55	13931.9	0.788494	-0.342828
16	sp|Q08163|CAP1_RAT	Adenylyl cyclase-associated protein 1 OS=Rattus norvegicus OX=10116 GN=Cap1 PE=1 SV=3	3.12808	0.01073	172828	134494	177223	131966	20311.5	22102.2	38333.7	0.778197	-0.361793
17	sp|P38650|DYHC1_RAT	Cytoplasmic dynein 1 heavy chain 1 OS=Rattus norvegicus OX=10116 GN=Dync1h1 PE=1 SV=1	3.99277	0.00255	58494.6	45373.3	60644.5	44013.2	7129.38	3737.55	13121.3	0.775683	-0.36646
18	tr|Q5XI77|Q5XI77_RAT	Annexin OS=Rattus norvegicus OX=10116 GN=Anxa11 PE=1 SV=1	5.18292	0.00041	87559.1	67911.4	86904.4	66704.4	6164.17	6944.51	19647.7	0.775607	-0.366603
19	sp|Q6AYT3|RTCB_RAT	RNA-splicing ligase RtcB homolog OS=Rattus norvegicus OX=10116 GN=Rtcb PE=2 SV=1	2.57435	0.02768	45901.3	35476.8	47245.1	36206	8166.33	5629.89	10424.5	0.772893	-0.371659
20	tr|A0A0A0MY14|A0A0A0MY14_RAT	40S ribosomal protein S28 OS=Rattus norvegicus OX=10116 GN=LOC100359503 PE=3 SV=1	3.56114	0.00517	72670.6	56115.6	73287.8	51867.1	6643.82	9248.16	16555.1	0.77219	-0.372972
21	sp|Q6P502|TCPG_RAT	T-complex protein 1 subunit gamma OS=Rattus norvegicus OX=10116 GN=Cct3 PE=1 SV=1	3.19418	0.00959	196049	151314	202399	156424	24542.7	23969.1	44734.9	0.771817	-0.373668
22	tr|D4AC23|D4AC23_RAT	T-complex protein 1 subunit eta OS=Rattus norvegicus OX=10116 GN=Cct7 PE=1 SV=1	2.70259	0.02221	77819.7	59996.2	81270.9	57814.3	11104.8	11732.3	17823.5	0.770964	-0.375265
23	sp|Q9JJ54|HNRPD_RAT	Heterogeneous nuclear ribonucleoprotein D0 OS=Rattus norvegicus OX=10116 GN=Hnrnpd PE=1 SV=2	2.29363	0.04474	111878	85626.5	110249	86112.6	25262.3	12156.5	26251.2	0.765358	-0.385793
24	tr|G3V8U9|G3V8U9_RAT	Proteasome subunit beta OS=Rattus norvegicus OX=10116 GN=Psmb4 PE=1 SV=2	2.3676	0.03944	27776.9	21191.3	28374.8	22177.7	5467.17	4066.02	6585.64	0.76291	-0.390416
25	sp|P28480|TCPA_RAT	T-complex protein 1 subunit alpha OS=Rattus norvegicus OX=10116 GN=Tcp1 PE=1 SV=1	2.29403	0.04471	77152.2	58832.7	76362.9	60832.5	10922.3	16227.6	18319.5	0.762554	-0.391089
26	sp|Q6MG61|CLIC1_RAT	Chloride intracellular channel protein 1 OS=Rattus norvegicus OX=10116 GN=Clic1 PE=1 SV=1	2.22832	0.04998	45198.3	34178.5	44179.3	34942.4	10440.1	6143.45	11019.8	0.75619	-0.403179
27	sp|P63018|HSP7C_RAT	Heat shock cognate 71 kDa protein OS=Rattus norvegicus OX=10116 GN=Hspa8 PE=1 SV=1	2.42278	0.03589	872812	659205	898977	676455	135993	167766	213607	0.755265	-0.404945
28	tr|A0A0G2K1C0|A0A0G2K1C0_RAT	Actin-related protein 3 OS=Rattus norvegicus OX=10116 GN=Actr3 PE=1 SV=1	3.39809	0.00679	236799	178345	245907	180285	19074.7	37571.4	58454.1	0.753149	-0.408993
29	tr|E2RUH2|E2RUH2_RAT	Ribonuclease inhibitor OS=Rattus norvegicus OX=10116 GN=Rnh1 PE=1 SV=1	3.55661	0.00521	47746.7	35801.5	47090.9	33230.2	3847.46	7271.7	11945.2	0.749821	-0.415381
30	sp|P16446|PIPNA_RAT	Phosphatidylinositol transfer protein alpha isoform OS=Rattus norvegicus OX=10116 GN=Pitpna PE=1 SV=2	2.60264	0.02637	49317.4	36887.2	49665.1	34073.1	8439.14	8101.96	12430.2	0.747955	-0.418977
31	sp|Q5XIM9|TCPB_RAT	T-complex protein 1 subunit beta OS=Rattus norvegicus OX=10116 GN=Cct2 PE=1 SV=3	3.38404	0.00696	171213	127896	166195	123720	24243.9	19883.4	43317.4	0.746997	-0.420826
32	tr|D4A8G5|D4A8G5_RAT	Transforming growth factor-beta-induced protein ig-h3 OS=Rattus norvegicus OX=10116 GN=Tgfbi PE=1 SV=2	2.6983	0.02238	259664	193785	278383	212691	45721.7	38549.5	65878.8	0.746292	-0.422187
33	sp|P63269|ACTH_RAT	Actin, gamma-enteric smooth muscle OS=Rattus norvegicus OX=10116 GN=Actg2 PE=2 SV=1	2.37712	0.0388	965363	713473	957192	706765	237700	104256	251890	0.739072	-0.436212
34	tr|Q5XI34|Q5XI34_RAT	Protein phosphatase 2 (Formerly 2A), regulatory subunit A (PR 65), alpha isoform, isoform CRA_a OS=Rattus norvegicus OX=10116 GN=Ppp2r1a PE=1 SV=1	3.68006	0.00425	97654.6	72153.1	91926.9	70272.1	12449.4	11538.3	25501.5	0.73886	-0.436627
35	tr|G3V9W6|G3V9W6_RAT	Aldehyde dehydrogenase OS=Rattus norvegicus OX=10116 GN=Aldh3a2 PE=1 SV=1	2.82661	0.01796	15306.4	11214.4	14056.2	10435.7	2375.17	2633	4091.94	0.732664	-0.448777
36	sp|Q4FZY0|EFHD2_RAT	EF-hand domain-containing protein D2 OS=Rattus norvegicus OX=10116 GN=Efhd2 PE=1 SV=1	2.31494	0.04314	62272.9	45519.6	58631.4	46705.7	7748.59	15943.8	16753.3	0.73097	-0.452116
37	sp|P85968|6PGD_RAT	6-phosphogluconate dehydrogenase, decarboxylating OS=Rattus norvegicus OX=10116 GN=Pgd PE=1 SV=1	2.50742	0.03105	136476	99440	139554	94379.5	23416.9	27580.2	37036	0.728626	-0.456749
38	tr|M0R5J4|M0R5J4_RAT	2-phospho-D-glycerate hydro-lyase OS=Rattus norvegicus OX=10116 PE=3 SV=1	2.53438	0.02965	524911	381650	485188	376682	115587	76232	143260	0.727077	-0.45982
39	sp|P08461|ODP2_RAT	Dihydrolipoyllysine-residue acetyltransferase component of pyruvate dehydrogenase complex, mitochondrial OS=Rattus norvegicus OX=10116 GN=Dlat PE=1 SV=3	2.95739	0.01435	52053.9	37835.9	51972.9	36570.3	8306.31	8347.64	14217.9	0.726861	-0.460249
40	tr|G3V852|G3V852_RAT	RCG55135, isoform CRA_b OS=Rattus norvegicus OX=10116 GN=Tln1 PE=1 SV=1	3.69796	0.00412	139104	100917	136775	97754	21286.8	13662.6	38186.3	0.725483	-0.462987
41	tr|A0A0G2JSZ5|A0A0G2JSZ5_RAT	Protein disulfide-isomerase A6 OS=Rattus norvegicus OX=10116 GN=Pdia6 PE=1 SV=1	2.93316	0.01496	169924	122134	174891	135398	27989.8	28449.1	47790.1	0.718757	-0.476425
42	sp|Q5RJR8|LRC59_RAT	Leucine-rich repeat-containing protein 59 OS=Rattus norvegicus OX=10116 GN=Lrrc59 PE=1 SV=1	3.92864	0.00283	105678	75702.6	101828	77853.2	17610.1	6259.62	29975.4	0.716351	-0.48126
43	sp|Q66X93|SND1_RAT	Staphylococcal nuclease domain-containing protein 1 OS=Rattus norvegicus OX=10116 GN=Snd1 PE=1 SV=1	2.42712	0.03563	49594.6	35516.7	48064.2	37756.9	9510.91	10554.6	14077.9	0.71614	-0.481686
44	sp|Q5XI07|LPP_RAT	Lipoma-preferred partner homolog OS=Rattus norvegicus OX=10116 GN=Lpp PE=1 SV=1	2.23169	0.0497	27792.8	19877.5	30107.2	20819	7468.93	4437.6	7915.29	0.715204	-0.483574
45	sp|B2GUZ5|CAZA1_RAT	F-actin-capping protein subunit alpha-1 OS=Rattus norvegicus OX=10116 GN=Capza1 PE=1 SV=1	2.39857	0.03741	49908.7	35385.2	49818.3	43350.4	4312.43	14191	14523.4	0.708999	-0.496144
46	sp|P13221|AATC_RAT	Aspartate aminotransferase, cytoplasmic OS=Rattus norvegicus OX=10116 GN=Got1 PE=1 SV=3	3.08087	0.01162	27947.8	19806.4	28295.1	19913.7	4575.14	4578.94	8141.37	0.708693	-0.496766
47	sp|P62963|PROF1_RAT	Profilin-1 OS=Rattus norvegicus OX=10116 GN=Pfn1 PE=1 SV=2	3.70474	0.00408	841552	595933	778371	599132	160541	24490.3	245620	0.708135	-0.497904
48	tr|G3V762|G3V762_RAT	GDP-4-keto-6-deoxy-D-mannose-3,5-epimerase-4-reductase OS=Rattus norvegicus OX=10116 GN=Tsta3 PE=1 SV=1	2.98926	0.01359	44666.3	31527.2	45338.4	29959.4	7044.96	8141.72	13139.1	0.705839	-0.502589
49	sp|P04166|CYB5B_RAT	Cytochrome b5 type B OS=Rattus norvegicus OX=10116 GN=Cyb5b PE=1 SV=2	2.77667	0.01956	19271.6	13571.9	17571.7	12915.2	3778.18	3317.69	5699.69	0.704243	-0.505854
50	sp|Q62920|PDLI5_RAT	PDZ and LIM domain protein 5 OS=Rattus norvegicus OX=10116 GN=Pdlim5 PE=1 SV=2	3.62124	0.00468	10031.4	7056.78	10058.6	6400.83	1335.03	1505.42	2974.63	0.703468	-0.507443
51	sp|P56571|ES1_RAT	ES1 protein homolog, mitochondrial OS=Rattus norvegicus OX=10116 PE=1 SV=2	2.94356	0.0147	34471.7	24199.7	34234.2	23368.2	3217.05	7919.36	10272	0.702017	-0.510422
52	tr|F1LMC7|F1LMC7_RAT	Septin-7 OS=Rattus norvegicus OX=10116 GN=Sept7 PE=1 SV=3	2.25038	0.04815	26025.7	18222.2	24838.6	19136.7	7893	3137.91	7803.45	0.700163	-0.514237
53	tr|D3ZFA8|D3ZFA8_RAT	40S ribosomal protein S17 OS=Rattus norvegicus OX=10116 GN=LOC100362366 PE=3 SV=1	2.79732	0.01888	33527.8	23474.6	32872.9	22725.7	8054.84	3551.77	10053.2	0.700153	-0.514258
54	tr|A0A0H2UHM7|A0A0H2UHM7_RAT	Tubulin alpha chain OS=Rattus norvegicus OX=10116 GN=LOC100909441 PE=3 SV=1	2.97503	0.01393	55864.6	39078.9	55557.7	39409.3	13002.4	4684.21	16785.6	0.69953	-0.515543
55	tr|G3V7C6|G3V7C6_RAT	Tubulin beta chain OS=Rattus norvegicus OX=10116 GN=Tubb4b PE=1 SV=2	2.50064	0.03141	142881	99892.4	136503	93729.9	24672.7	34123.9	42988.4	0.699131	-0.516366
56	sp|Q64428|ECHA_RAT	Trifunctional enzyme subunit alpha, mitochondrial OS=Rattus norvegicus OX=10116 GN=Hadha PE=1 SV=2	3.52999	0.00545	169889	118544	175532	128592	24223.4	26127.3	51345	0.697774	-0.519169
57	sp|O70351|HCD2_RAT	3-hydroxyacyl-CoA dehydrogenase type-2 OS=Rattus norvegicus OX=10116 GN=Hsd17b10 PE=1 SV=3	5.19956	0.0004	66383.3	46253.5	63602.1	45044.7	8587.02	4023.89	20129.8	0.696764	-0.521259
58	sp|P56574|IDHP_RAT	Isocitrate dehydrogenase [NADP], mitochondrial OS=Rattus norvegicus OX=10116 GN=Idh2 PE=1 SV=2	2.25467	0.0478	407394	282921	415089	243318	84565.4	105524	124472	0.694467	-0.526022
59	sp|P16617|PGK1_RAT	Phosphoglycerate kinase 1 OS=Rattus norvegicus OX=10116 GN=Pgk1 PE=1 SV=2	4.83311	0.00069	576465	399849	577450	385722	45475.7	77099	176616	0.693623	-0.527777
60	sp|Q5XFX0|TAGL2_RAT	Transgelin-2 OS=Rattus norvegicus OX=10116 GN=Tagln2 PE=1 SV=1	2.91196	0.01551	422182	292740	420057	254379	66080.5	86539.4	129442	0.693398	-0.528244
61	sp|P62890|RL30_RAT	60S ribosomal protein L30 OS=Rattus norvegicus OX=10116 GN=Rpl30 PE=3 SV=2	3.07352	0.01177	94776.5	65180	96930.4	67744.6	17309	16023.8	29596.5	0.687723	-0.5401
62	sp|Q9Z2L0|VDAC1_RAT	Voltage-dependent anion-selective channel protein 1 OS=Rattus norvegicus OX=10116 GN=Vdac1 PE=1 SV=4	2.34116	0.04126	198313	135742	194420	137561	48822.3	43614.4	62571.1	0.684483	-0.546912
63	tr|D4A8D5|D4A8D5_RAT	Filamin B OS=Rattus norvegicus OX=10116 GN=Flnb PE=1 SV=1	2.71133	0.02188	70011.6	47731.6	65869	48131.7	10005.3	17465.5	22279.9	0.681768	-0.552647
64	tr|Q5M9H2|Q5M9H2_RAT	Acyl-Coenzyme A dehydrogenase, very long chain OS=Rattus norvegicus OX=10116 GN=Acadvl PE=1 SV=1	2.73747	0.02092	20459.3	13873.9	19759.8	13502.4	4559.99	3732.14	6585.36	0.678124	-0.560379
65	tr|F2Z3Q8|F2Z3Q8_RAT	Importin subunit beta-1 OS=Rattus norvegicus OX=10116 GN=Kpnb1 PE=1 SV=1	3.23851	0.00889	48444.3	32781.2	47683.9	32934.7	10420.7	5635.64	15663.1	0.676678	-0.563459
66	tr|D3ZZC1|D3ZZC1_RAT	RCG43947 OS=Rattus norvegicus OX=10116 GN=Txndc5 PE=1 SV=1	3.30671	0.00792	92126.3	62324.4	89040.4	65517.6	11526.6	18828	29801.9	0.676511	-0.563815
67	tr|A0A0A0MXY5|A0A0A0MXY5_RAT	ATP-dependent 6-phosphofructokinase OS=Rattus norvegicus OX=10116 GN=Pfkp PE=1 SV=2	2.23122	0.04974	20660.5	13951.8	22031.7	16151	5200.83	5214.89	6708.76	0.675286	-0.566429
68	sp|Q8CFN2|CDC42_RAT	Cell division control protein 42 homolog OS=Rattus norvegicus OX=10116 GN=Cdc42 PE=1 SV=2	3.58096	0.005	57912.8	39071.7	60961.7	39838.4	7442.37	10521.9	18841.1	0.674664	-0.56776
69	tr|F1LN88|F1LN88_RAT	Aldehyde dehydrogenase, mitochondrial OS=Rattus norvegicus OX=10116 GN=Aldh2 PE=1 SV=2	5.17403	0.00042	370959	250007	363708	259588	39444.8	41507.9	120951	0.673949	-0.569288
70	sp|Q68FS4|AMPL_RAT	Cytosol aminopeptidase OS=Rattus norvegicus OX=10116 GN=Lap3 PE=1 SV=1	2.30992	0.04351	56698.9	38195.8	53838.3	33950.8	14926.9	12734.9	18503.1	0.67366	-0.569908
71	sp|P04642|LDHA_RAT	L-lactate dehydrogenase A chain OS=Rattus norvegicus OX=10116 GN=Ldha PE=1 SV=1	4.26285	0.00166	1.17957e+06	791687	1.12877e+06	753059	166329	148359	387880	0.671168	-0.575255
72	sp|P07151|B2MG_RAT	Beta-2-microglobulin OS=Rattus norvegicus OX=10116 GN=B2m PE=1 SV=1	4.22327	0.00176	52827	35412.7	54753.7	37523.8	7561.3	6696.38	17414.3	0.670353	-0.577008
73	tr|M0R907|M0R907_RAT	Small nuclear ribonucleoprotein Sm D3 OS=Rattus norvegicus OX=10116 GN=Snrpd3 PE=1 SV=1	2.66905	0.02353	72120.1	48332	71500.3	57781.8	10248.6	19276.1	23788	0.670161	-0.577421
74	sp|Q5M9I5|QCR6_RAT	Cytochrome b-c1 complex subunit 6, mitochondrial OS=Rattus norvegicus OX=10116 GN=Uqcrh PE=3 SV=1	4.29901	0.00156	34960.6	23233.7	34030.1	21913.3	5274.75	4101.62	11727	0.664566	-0.589515
75	sp|Q3T1K5|CAZA2_RAT	F-actin-capping protein subunit alpha-2 OS=Rattus norvegicus OX=10116 GN=Capza2 PE=1 SV=1	2.30772	0.04368	67580	44715.3	66437.9	44051.4	17890.8	16398.7	22864.6	0.661665	-0.595826
76	tr|Q6TXG7|Q6TXG7_RAT	Serine hydroxymethyltransferase OS=Rattus norvegicus OX=10116 GN=Shmt1 PE=1 SV=1	4.65061	0.00091	36395.9	24062.5	36300.1	23686.8	5269.7	3798.53	12333.4	0.661131	-0.596991
77	tr|D4ACB8|D4ACB8_RAT	CCT-theta OS=Rattus norvegicus OX=10116 GN=Cct8 PE=1 SV=1	7.65997	1.719e-05	132610	87641.7	134615	86476.6	9500.35	10794.5	44968	0.6609	-0.597496
78	sp|Q4KM35|PSB10_RAT	Proteasome subunit beta type-10 OS=Rattus norvegicus OX=10116 GN=Psmb10 PE=2 SV=1	6.19321	0.0001	33316.2	22016	33585	21052.6	1835.31	4075.14	11300.2	0.66082	-0.59767
79	sp|Q6P6R2|DLDH_RAT	Dihydrolipoyl dehydrogenase, mitochondrial OS=Rattus norvegicus OX=10116 GN=Dld PE=1 SV=1	3.31996	0.00775	41363.5	27151	40386.4	28844	6828.93	7957.61	14212.5	0.656401	-0.607351
80	sp|P62260|1433E_RAT	14-3-3 protein epsilon OS=Rattus norvegicus OX=10116 GN=Ywhae PE=1 SV=1	4.8064	0.00072	321940	210777	311834	206646	35125.5	44448.5	111163	0.654708	-0.611077
81	tr|D3ZJH9|D3ZJH9_RAT	Aldehyde dehydrogenase, mitochondrial OS=Rattus norvegicus OX=10116 GN=Aldh2 PE=1 SV=2	2.34379	0.04107	79212.4	51821.9	84305.6	51294.9	18418.6	21913.2	27390.5	0.654214	-0.612165
82	sp|Q6AY09|HNRH2_RAT	Heterogeneous nuclear ribonucleoprotein H2 OS=Rattus norvegicus OX=10116 GN=Hnrnph2 PE=1 SV=1	9.37257	2.8693e-06	23207.9	15084.7	23118.7	15405.9	1083.35	1825.75	8123.22	0.64998	-0.621532
83	sp|P50503|F10A1_RAT	Hsc70-interacting protein OS=Rattus norvegicus OX=10116 GN=St13 PE=1 SV=1	3.86581	0.00313	21512.8	13960.1	22233.9	14529.8	2373.96	4155.29	7552.71	0.64892	-0.623888
84	tr|A0A0H2UHS7|A0A0H2UHS7_RAT	60S ribosomal protein L18 OS=Rattus norvegicus OX=10116 GN=Rpl18 PE=1 SV=1	2.92895	0.01507	146780	94863.8	155238	103812	33345.3	27806.1	51916.1	0.6463	-0.629725
85	tr|Q3KRF2|Q3KRF2_RAT	High density lipoprotein binding protein (Vigilin) OS=Rattus norvegicus OX=10116 GN=Hdlbp PE=1 SV=1	2.5027	0.0313	10838	6987.39	9792.79	6885.82	3381.13	1664.73	3850.6	0.644713	-0.633272
86	sp|Q4V8H8|EHD2_RAT	EH domain-containing protein 2 OS=Rattus norvegicus OX=10116 GN=Ehd2 PE=1 SV=1	2.82896	0.01788	200991	129044	202053	132792	47708.2	40058.5	71946.5	0.642041	-0.639262
87	tr|Q6P3V9|Q6P3V9_RAT	60S ribosomal protein L4 OS=Rattus norvegicus OX=10116 GN=Rpl4 PE=1 SV=1	3.88068	0.00306	341798	218639	350324	187214	35195.6	69314.9	123160	0.639672	-0.644597
88	sp|Q7TPB1|TCPD_RAT	T-complex protein 1 subunit delta OS=Rattus norvegicus OX=10116 GN=Cct4 PE=1 SV=3	4.3854	0.00137	138187	87241.9	136354	83814.4	23709.7	15734.7	50945.3	0.631331	-0.663531
89	sp|P40329|SYRC_RAT	Arginine--tRNA ligase, cytoplasmic OS=Rattus norvegicus OX=10116 GN=Rars1 PE=1 SV=2	3.21636	0.00923	32448.7	20448.4	31903.6	20889.4	7061.15	5802	12000.3	0.630176	-0.666173
90	tr|M0RCY2|M0RCY2_RAT	40S ribosomal protein S13 OS=Rattus norvegicus OX=10116 PE=3 SV=1	2.86259	0.01688	127384	80261.1	125760	80889.3	26036.6	30789.7	47122.9	0.630072	-0.666412
91	tr|A0A0G2K8Q8|A0A0G2K8Q8_RAT	Ubiquinol-cytochrome c reductase, complex III subunit X OS=Rattus norvegicus OX=10116 GN=Uqcr10 PE=1 SV=1	3.30661	0.00792	23209.4	14578.6	23930.4	14263.3	5235.87	3669.24	8630.78	0.628133	-0.670857
92	sp|P40112|PSB3_RAT	Proteasome subunit beta type-3 OS=Rattus norvegicus OX=10116 GN=Psmb3 PE=1 SV=1	4.37491	0.00139	29408.2	18404.9	30165.6	18484.2	3810.78	4840.64	11003.3	0.625843	-0.676127
93	tr|F1LRV4|F1LRV4_RAT	Heat shock 70 kDa protein 4 OS=Rattus norvegicus OX=10116 GN=Hspa4 PE=1 SV=1	4.52091	0.00111	65292	40861.5	67348.9	45534.4	8125.94	10449	24430.5	0.625827	-0.676164
94	sp|P29314|RS9_RAT	40S ribosomal protein S9 OS=Rattus norvegicus OX=10116 GN=Rps9 PE=1 SV=4	3.57501	0.00505	147826	92348.5	145484	100777	26489	27262.2	55477.8	0.624709	-0.678743
95	sp|P14659|HSP72_RAT	Heat shock-related 70 kDa protein 2 OS=Rattus norvegicus OX=10116 GN=Hspa2 PE=1 SV=2	3.20342	0.00944	29945.4	18698.4	30534	19050.3	7833.03	3550.27	11247.1	0.624415	-0.679423
96	sp|Q9WVK7|HCDH_RAT	Hydroxyacyl-coenzyme A dehydrogenase, mitochondrial OS=Rattus norvegicus OX=10116 GN=Hadh PE=2 SV=1	2.61933	0.02563	60188.3	37507.9	64137.5	31223	16797.9	12949.4	22680.4	0.623176	-0.682289
97	tr|B5DES0|B5DES0_RAT	Small nuclear ribonucleoprotein Sm D2 OS=Rattus norvegicus OX=10116 GN=Snrpd2 PE=1 SV=1	3.23798	0.0089	11293.3	6943.61	11418.2	7910.75	1754.02	2784.04	4349.74	0.614841	-0.701715
98	tr|A0A0G2JSS8|A0A0G2JSS8_RAT	Peroxiredoxin-5 OS=Rattus norvegicus OX=10116 GN=Prdx5 PE=1 SV=1	4.73884	0.00079	192620	118299	186024	110808	30817.1	22937.1	74320.9	0.614157	-0.70332
99	sp|P62630|EF1A1_RAT	Elongation factor 1-alpha 1 OS=Rattus norvegicus OX=10116 GN=Eef1a1 PE=2 SV=1	2.65365	0.02416	3.37285e+06	2.06555e+06	3.5325e+06	1.97988e+06	670832	1.00307e+06	1.3073e+06	0.612406	-0.707441
100	sp|P50399|GDIB_RAT	Rab GDP dissociation inhibitor beta OS=Rattus norvegicus OX=10116 GN=Gdi2 PE=1 SV=2	3.99026	0.00256	224286	136795	232865	155535	27155.8	46337	87491.4	0.609912	-0.713327
101	tr|Q6P736|Q6P736_RAT	Polypyrimidine tract-binding protein 1 OS=Rattus norvegicus OX=10116 GN=Ptbp1 PE=1 SV=1	7.08934	3.3376e-05	55052.8	33362.4	55376.3	33382.2	5332.71	5265.77	21690.4	0.606007	-0.722593
102	tr|A0A0G2JSH9|A0A0G2JSH9_RAT	Peroxiredoxin-2 OS=Rattus norvegicus OX=10116 GN=Prdx2 PE=1 SV=1	3.28689	0.00819	127332	77084.9	124732	88747.3	18024.6	32821.8	50246.8	0.605387	-0.724071
103	tr|A0A0G2KA61|A0A0G2KA61_RAT	Casein kinase II subunit beta OS=Rattus norvegicus OX=10116 GN=Csnk2b PE=1 SV=1	2.45317	0.03407	8527.1	5152.23	8746.6	5840.38	1041.5	3204.81	3374.86	0.604219	-0.726856
104	sp|P42123|LDHB_RAT	L-lactate dehydrogenase B chain OS=Rattus norvegicus OX=10116 GN=Ldhb PE=1 SV=2	4.33323	0.00148	71161.9	42635.6	69774.1	42727.4	15365	4893.21	28526.4	0.599134	-0.739048
105	tr|G3V6C1|G3V6C1_RAT	RCG24055, isoform CRA_b OS=Rattus norvegicus OX=10116 GN=Serpinb5 PE=3 SV=3	3.33255	0.00759	8561.46	5114.71	8878.71	5026.09	2430.25	715.641	3446.76	0.59741	-0.743206
106	sp|Q6AYC4|CAPG_RAT	Macrophage-capping protein OS=Rattus norvegicus OX=10116 GN=Capg PE=1 SV=1	2.54133	0.0293	15039.1	8973.12	14697.2	9134.65	3752.9	4483.34	6065.97	0.596653	-0.745036
107	sp|P0C5H9|MANF_RAT	Mesencephalic astrocyte-derived neurotrophic factor OS=Rattus norvegicus OX=10116 GN=Manf PE=1 SV=1	2.42976	0.03546	15514.2	9200.34	17229	9299.99	6096.95	1828.3	6313.9	0.593026	-0.753834
108	tr|G3V8L1|G3V8L1_RAT	PYD and CARD domain-containing OS=Rattus norvegicus OX=10116 GN=Pycard PE=1 SV=1	2.73381	0.02106	125540	74363.4	125482	69732.6	28570.7	35864.7	51176.1	0.592351	-0.755476
109	tr|G3V9G4|G3V9G4_RAT	ATP-citrate synthase OS=Rattus norvegicus OX=10116 GN=Acly PE=1 SV=1	2.84386	0.01743	27480	16215.5	26046.2	16740.4	5091.05	8259.39	11264.5	0.590084	-0.761008
110	sp|P24090|FETUA_RAT	Alpha-2-HS-glycoprotein OS=Rattus norvegicus OX=10116 GN=Ahsg PE=1 SV=2	2.57198	0.0278	20136.7	11857.3	18577.3	11529.6	7263.73	3068.19	8279.45	0.588838	-0.764057
111	tr|D3ZQN7|D3ZQN7_RAT	Laminin subunit beta 1 OS=Rattus norvegicus OX=10116 GN=Lamb1 PE=1 SV=3	3.47734	0.00595	42555.8	24783.1	45899.2	26166.6	9714.56	7896.99	17772.8	0.582366	-0.780002
112	tr|F1LRE1|F1LRE1_RAT	Glutathione-disulfide reductase OS=Rattus norvegicus OX=10116 GN=Gsr PE=1 SV=2	2.45222	0.03413	19892.5	11569	22945.2	12522.8	6135.43	5611.01	8323.52	0.581575	-0.781963
113	sp|P84817|FIS1_RAT	Mitochondrial fission 1 protein OS=Rattus norvegicus OX=10116 GN=Fis1 PE=1 SV=1	2.51524	0.03064	10750.6	6235.94	9184.22	5776.36	4258.98	1091.62	4514.67	0.580055	-0.785739
114	sp|P61972|NTF2_RAT	Nuclear transport factor 2 OS=Rattus norvegicus OX=10116 GN=Nutf2 PE=1 SV=1	2.46417	0.03344	10031.5	5787.87	10979	5625.21	2956.71	3008.73	4243.65	0.576968	-0.793436
115	sp|Q6P7Q4|LGUL_RAT	Lactoylglutathione lyase OS=Rattus norvegicus OX=10116 GN=Glo1 PE=1 SV=3	3.16878	0.01001	41778.7	23926.6	42576	23381.9	8904.97	10542.2	17852.1	0.572698	-0.804154
116	tr|A0A140TAG9|A0A140TAG9_RAT	Hsp90 chaperone protein kinase-targeting subunit OS=Rattus norvegicus OX=10116 GN=Cdc37 PE=1 SV=1	2.7861	0.01925	10257.8	5860.73	10670.5	6269.7	3016.64	2417.49	4397.03	0.571346	-0.807564
117	tr|A0A0G2K1F3|A0A0G2K1F3_RAT	Coatomer subunit gamma OS=Rattus norvegicus OX=10116 GN=Copg1 PE=1 SV=1	3.75038	0.00378	13915.7	7796.59	14533.1	8837.32	2918.33	2730.56	6119.1	0.560273	-0.835797
118	sp|Q6P6V0|G6PI_RAT	Glucose-6-phosphate isomerase OS=Rattus norvegicus OX=10116 GN=Gpi PE=1 SV=1	6.83117	4.5626e-05	148353	82713.3	144461	78849.2	18187.4	14939.8	65639.8	0.557543	-0.842844
119	sp|Q9R0T4|CADH1_RAT	Cadherin-1 OS=Rattus norvegicus OX=10116 GN=Cdh1 PE=1 SV=1	2.38634	0.0382	14840	8269.31	15130.9	8445.45	5473.36	3941.02	6570.71	0.557231	-0.843654
120	sp|P11980|KPYM_RAT	Pyruvate kinase PKM OS=Rattus norvegicus OX=10116 GN=Pkm PE=1 SV=3	3.21121	0.00931	32809.6	18226.1	31164	16221.9	5672.53	9569.25	14583.5	0.555511	-0.848114
121	sp|Q5XIE0|AN32E_RAT	Acidic leucine-rich nuclear phosphoprotein 32 family member E OS=Rattus norvegicus OX=10116 GN=Anp32e PE=2 SV=1	2.64921	0.02435	34922.5	19346.2	32490.6	16100.9	9823.41	10531.7	15576.2	0.553977	-0.852103
122	tr|G3V6H9|G3V6H9_RAT	Nucleosome assembly protein 1-like 1 OS=Rattus norvegicus OX=10116 GN=Nap1l1 PE=1 SV=1	3.84981	0.00321	18205.5	10003.5	17373.3	9573.9	4940.28	1681.47	8201.94	0.54948	-0.863862
123	sp|P21913|SDHB_RAT	Succinate dehydrogenase [ubiquinone] iron-sulfur subunit, mitochondrial OS=Rattus norvegicus OX=10116 GN=Sdhb PE=2 SV=2	2.64918	0.02435	70316.4	38377	76941.9	31954.7	24233.5	16878.1	31939.4	0.545776	-0.87362
124	sp|O55159|EPCAM_RAT	Epithelial cell adhesion molecule OS=Rattus norvegicus OX=10116 GN=Epcam PE=1 SV=1	3.18118	0.0098	88471.3	47708.8	90811	44537.9	25430	18397	40762.5	0.539257	-0.890954
125	tr|F7ETL6|F7ETL6_RAT	Sm protein E OS=Rattus norvegicus OX=10116 PE=3 SV=2	2.30541	0.04385	23932.3	12837.4	24136.8	13857.2	8742.75	7907.38	11094.8	0.536407	-0.8986
126	tr|A0A097BW25|A0A097BW25_RAT	Periostin OS=Rattus norvegicus OX=10116 GN=Postn PE=1 SV=1	3.06755	0.01189	186367	99624.7	186551	98792	66898.4	17950.4	86741.9	0.534563	-0.903568
127	sp|Q4G075|ILEUA_RAT	Leukocyte elastase inhibitor A OS=Rattus norvegicus OX=10116 GN=Serpinb1a PE=1 SV=1	3.44699	0.00626	166199	88614.9	168141	82498.3	42150.3	35537.8	77584	0.533186	-0.90729
128	tr|Q5BJP4|Q5BJP4_RAT	RNA binding motif protein 39 OS=Rattus norvegicus OX=10116 GN=Rbm39 PE=1 SV=1	2.60547	0.02624	4623.55	2457.41	4564.87	2053.32	1663.55	1174.66	2166.15	0.531497	-0.911866
129	tr|G3V6S2|G3V6S2_RAT	Citrate hydro-lyase OS=Rattus norvegicus OX=10116 GN=Aco1 PE=1 SV=1	3.34025	0.00749	49282.6	26154.2	48780.9	27360.4	13478.2	10295.6	23128.3	0.5307	-0.914032
130	sp|P63029|TCTP_RAT	Translationally-controlled tumor protein OS=Rattus norvegicus OX=10116 GN=Tpt1 PE=1 SV=1	2.68873	0.02275	61339.3	32512.8	60664.4	38712.3	10184.6	24206.2	28826.5	0.530048	-0.915805
131	tr|G3V7Q7|G3V7Q7_RAT	IQ motif containing GTPase activating protein 1 (Predicted), isoform CRA_b OS=Rattus norvegicus OX=10116 GN=Iqgap1 PE=1 SV=1	5.04651	0.0005	111176	58745	114207	51835.6	13259.4	21721.8	52430.5	0.528399	-0.920301
132	tr|A0A0G2JSW0|A0A0G2JSW0_RAT	Myosin regulatory light chain 12B OS=Rattus norvegicus OX=10116 GN=Myl12b PE=4 SV=1	2.29747	0.04445	4130.45	2178.31	4551.09	2206.56	1647.49	1271.86	1952.14	0.527379	-0.923088
133	tr|A0A0G2K8T0|A0A0G2K8T0_RAT	Acid ceramidase OS=Rattus norvegicus OX=10116 GN=Asah1 PE=1 SV=1	3.26647	0.00848	20266.3	10623.7	20767.5	10631	6424.57	3318.36	9642.69	0.524202	-0.931806
134	sp|P13084|NPM_RAT	Nucleophosmin OS=Rattus norvegicus OX=10116 GN=Npm1 PE=1 SV=1	5.22647	0.00039	81731.3	42771.3	83357.7	36586.1	10815.8	14711.3	38960	0.523316	-0.934246
135	sp|P62083|RS7_RAT	40S ribosomal protein S7 OS=Rattus norvegicus OX=10116 GN=Rps7 PE=1 SV=1	4.11939	0.00208	103037	52129.2	100579	54011.3	26473.3	14680.5	50908.3	0.505925	-0.983005
136	sp|Q5PPN5|TPPP3_RAT	Tubulin polymerization-promoting protein family member 3 OS=Rattus norvegicus OX=10116 GN=Tppp3 PE=2 SV=1	2.626	0.02534	9336.13	4718.22	8095.99	4576.18	2948.46	3140.27	4617.91	0.505372	-0.984581
137	tr|D3ZZZ9|D3ZZZ9_RAT	Catenin (Cadherin associated protein), delta 1 (Predicted), isoform CRA_a OS=Rattus norvegicus OX=10116 GN=Ctnnd1 PE=1 SV=1	3.38359	0.00696	60836.7	30520.5	58520.8	37502.5	15503	15534.6	30316.2	0.501679	-0.995164
138	tr|E9PT29|E9PT29_RAT	RNA helicase OS=Rattus norvegicus OX=10116 GN=Ddx17 PE=1 SV=3	2.77274	0.01969	5566.66	2785.14	5371.14	2492.79	2095.47	1283.39	2781.52	0.500325	-0.999062
139	tr|G3V6A9|G3V6A9_RAT	Microfibril associated protein 4 OS=Rattus norvegicus OX=10116 GN=Mfap4 PE=1 SV=2	2.33787	0.04149	19421.1	9674.76	14520.8	9048.52	9905.31	2482.46	9746.33	0.498157	-1.00533
140	sp|P08010|GSTM2_RAT	Glutathione S-transferase Mu 2 OS=Rattus norvegicus OX=10116 GN=Gstm2 PE=1 SV=2	4.34818	0.00145	69823.3	34666.7	73998.3	36948.2	18509.6	7045.21	35156.7	0.496491	-1.01016
141	sp|P13803|ETFA_RAT	Electron transfer flavoprotein subunit alpha, mitochondrial OS=Rattus norvegicus OX=10116 GN=Etfa PE=1 SV=4	5.84214	0.00016	123022	59885	126139	59570	24579.2	9830.11	63137	0.486783	-1.03865
142	tr|D3ZM69|D3ZM69_RAT	Erythrocyte membrane protein band 4.1-like 2 OS=Rattus norvegicus OX=10116 GN=Epb41l2 PE=1 SV=2	2.34565	0.04094	7625	3661.35	7768.53	2647.86	960.159	4026.21	3963.65	0.480177	-1.05836
143	sp|Q6B345|S10AB_RAT	Protein S100-A11 OS=Rattus norvegicus OX=10116 GN=S100a11 PE=3 SV=1	4.65342	0.0009	34408.5	16505.9	33670.1	16842.1	9280.28	1637.69	17902.6	0.479704	-1.05978
144	tr|Q6AYS3|Q6AYS3_RAT	Carboxypeptidase OS=Rattus norvegicus OX=10116 GN=Ctsa PE=1 SV=1	3.97968	0.0026	13141.8	6271.94	14135	4731.72	2262.69	3572.04	6869.85	0.477252	-1.06718
145	sp|P97532|THTM_RAT	3-mercaptopyruvate sulfurtransferase OS=Rattus norvegicus OX=10116 GN=Mpst PE=1 SV=3	6.99094	3.7564e-05	30518	14515.5	30449.4	14354.1	4934.68	2662.16	16002.5	0.475637	-1.07207
146	tr|D3ZLA3|D3ZLA3_RAT	Copine 3 OS=Rattus norvegicus OX=10116 GN=Cpne3 PE=1 SV=1	2.33943	0.04138	30706.3	14477.7	36847.4	15763.9	16675.4	3265.08	16228.6	0.471491	-1.0847
147	tr|G3V743|G3V743_RAT	Mannosyl-oligosaccharide glucosidase OS=Rattus norvegicus OX=10116 GN=Mogs PE=3 SV=2	3.38714	0.00692	5036.96	2374.17	5250.33	2456.21	1539.91	1156.22	2662.79	0.471351	-1.08513
148	tr|Q45QJ4|Q45QJ4_RAT	1-phosphatidylinositol 4,5-bisphosphate phosphodiesterase OS=Rattus norvegicus OX=10116 GN=Plcb3 PE=1 SV=1	3.64626	0.00449	29973.9	14117	31166.1	12117.6	6862.23	8147.63	15857	0.470975	-1.08628
149	tr|Q5EBB0|Q5EBB0_RAT	Similar to 14-3-3 protein sigma OS=Rattus norvegicus OX=10116 GN=LOC298795 PE=2 SV=1	2.43917	0.0349	24087.4	11321.9	21719.3	10270.9	11714.8	5206.01	12765.5	0.470036	-1.08916
150	tr|F1LZF4|F1LZF4_RAT	Collagen type VI alpha 5 chain OS=Rattus norvegicus OX=10116 GN=Col6a5 PE=1 SV=3	3.38502	0.00694	473760	221133	463734	233905	169335	68879.1	252627	0.466761	-1.09924
151	sp|P68511|1433F_RAT	14-3-3 protein eta OS=Rattus norvegicus OX=10116 GN=Ywhah PE=1 SV=2	6.35619	8.2855e-05	52085.7	24266.2	52228	23055.2	9234.53	5446.05	27819.5	0.46589	-1.10194
152	tr|A0A0G2JYA4|A0A0G2JYA4_RAT	Serine/threonine-protein phosphatase OS=Rattus norvegicus OX=10116 GN=LOC100362453 PE=3 SV=1	3.60123	0.00484	11251	5200.09	11660.1	5041.86	1091.13	3968.48	6050.95	0.462187	-1.11345
153	tr|A0A0G2JVG3|A0A0G2JVG3_RAT	Pyruvate kinase OS=Rattus norvegicus OX=10116 GN=Pkm PE=1 SV=1	3.63855	0.00455	55793.4	25771.2	52565.2	32144.8	15195.1	13326.7	30022.3	0.461903	-1.11434
154	sp|P41562|IDHC_RAT	Isocitrate dehydrogenase [NADP] cytoplasmic OS=Rattus norvegicus OX=10116 GN=Idh1 PE=1 SV=1	6.0353	0.00013	232327	107114	224511	88938.8	35985.3	35883.5	125213	0.461048	-1.11701
155	sp|P05370|G6PD_RAT	Glucose-6-phosphate 1-dehydrogenase OS=Rattus norvegicus OX=10116 GN=G6pdx PE=1 SV=3	2.32101	0.0427	23124.3	10596.2	22630.3	9972.92	12361.3	4691.32	12528.1	0.458228	-1.12586
156	tr|F1LZC5|F1LZC5_RAT	Complex I-B16.6 OS=Rattus norvegicus OX=10116 PE=3 SV=2	7.76808	1.5221e-05	56840.5	25963.4	58822.2	24903.8	6125.71	7567.88	30877.1	0.456777	-1.13044
157	tr|Q499Q4|Q499Q4_RAT	Phosphoglucomutase-1 OS=Rattus norvegicus OX=10116 GN=Pgm1 PE=1 SV=2	2.85835	0.017	5379.02	2451.26	5197.83	2353.85	740.897	2397.08	2927.75	0.455709	-1.13382
158	sp|P43527|CASP1_RAT	Caspase-1 OS=Rattus norvegicus OX=10116 GN=Casp1 PE=2 SV=1	4.49318	0.00116	30673.3	13952.1	31110.8	14657.9	7144.72	5661.14	16721.2	0.454861	-1.1365
159	sp|P23514|COPB_RAT	Coatomer subunit beta OS=Rattus norvegicus OX=10116 GN=Copb1 PE=1 SV=1	4.81994	0.0007	11925.8	5370.06	11329.7	5755.5	1858.3	2765.23	6555.78	0.450288	-1.15108
160	tr|D4A9D6|D4A9D6_RAT	RNA helicase OS=Rattus norvegicus OX=10116 GN=Dhx9 PE=1 SV=1	4.13202	0.00204	33848.2	15206.2	35066.9	16339.1	7961.09	7664.76	18642	0.449247	-1.15442
161	sp|P50398|GDIA_RAT	Rab GDP dissociation inhibitor alpha OS=Rattus norvegicus OX=10116 GN=Gdi1 PE=1 SV=1	2.93105	0.01501	72360.4	32108.3	57555.4	32607.3	32688.5	7939.28	40252.1	0.443728	-1.17225
162	tr|D4ABT8|D4ABT8_RAT	Heterogeneous nuclear ribonucleoprotein U-like 2 OS=Rattus norvegicus OX=10116 GN=Hnrnpul2 PE=1 SV=1	4.89648	0.00063	20780.5	9199.24	20714	10807.2	3315.37	4751.22	11581.3	0.442685	-1.17565
163	tr|D4A1W8|D4A1W8_RAT	Microsomal triglyceride transfer protein large subunit OS=Rattus norvegicus OX=10116 GN=Mttp PE=1 SV=1	2.72762	0.02128	142972	62828.6	149584	67171.9	62486.6	35710.9	80143.2	0.439448	-1.18624
164	sp|P63102|1433Z_RAT	14-3-3 protein zeta/delta OS=Rattus norvegicus OX=10116 GN=Ywhaz PE=1 SV=1	10.1074	1.4412e-06	587146	257715	580198	255355	38362.5	70015.7	329431	0.438928	-1.18794
165	tr|Q6P6U2|Q6P6U2_RAT	26S proteasome regulatory subunit 6A OS=Rattus norvegicus OX=10116 GN=Psmc3 PE=1 SV=1	2.39923	0.03736	6666	2899.23	6703.3	2961.83	3426.19	1746.55	3766.77	0.434928	-1.20115
166	sp|P07335|KCRB_RAT	Creatine kinase B-type OS=Rattus norvegicus OX=10116 GN=Ckb PE=1 SV=2	4.71639	0.00082	1.58806e+06	689890	1.60633e+06	662851	411087	220455	898167	0.434424	-1.20282
167	sp|Q920A6|RISC_RAT	Retinoid-inducible serine carboxypeptidase OS=Rattus norvegicus OX=10116 GN=Scpep1 PE=2 SV=1	5.5699	0.00024	42174	18193.2	41827.7	18674.5	9730.03	4067.72	23980.7	0.431385	-1.21295
168	tr|M0R6L9|M0R6L9_RAT	Ferritin OS=Rattus norvegicus OX=10116 PE=3 SV=1	2.95284	0.01446	34780.9	14995.7	31669.3	11113.6	8911.72	13782.4	19785.2	0.431147	-1.21375
169	tr|D3ZF13|D3ZF13_RAT	Acyl carrier protein OS=Rattus norvegicus OX=10116 GN=Ndufab1 PE=1 SV=1	3.16272	0.01011	39792.5	17143.1	40695.7	16805.8	14895.6	9264.4	22649.4	0.430813	-1.21487
170	sp|P60901|PSA6_RAT	Proteasome subunit alpha type-6 OS=Rattus norvegicus OX=10116 GN=Psma6 PE=1 SV=1	7.72085	1.605e-05	57053.8	24570.1	59889.6	25389.6	8358.8	6028.04	32483.7	0.430648	-1.21542
171	sp|P13832|MRLCA_RAT	Myosin regulatory light chain RLC-A OS=Rattus norvegicus OX=10116 GN=Rlc-a PE=2 SV=2	5.27128	0.00036	25113	10724.7	25587	10375.5	6289.22	2269.15	14388.3	0.427057	-1.2275
172	sp|P68255|1433T_RAT	14-3-3 protein theta OS=Rattus norvegicus OX=10116 GN=Ywhaq PE=1 SV=1	3.51153	0.00562	152735	64418.1	157479	63856.9	60795	9961.65	88316.5	0.421765	-1.24549
173	tr|A0A0G2K8P3|A0A0G2K8P3_RAT	E3 ubiquitin-protein ligase OS=Rattus norvegicus OX=10116 GN=Nedd4 PE=1 SV=1	7.11018	3.2556e-05	19054.9	7927.88	18808.8	8536.85	2421.96	2971.27	11127.1	0.416054	-1.26516
174	tr|Q2IBC6|Q2IBC6_RAT	Caveolin OS=Rattus norvegicus OX=10116 GN=Cav1 PE=1 SV=1	3.14934	0.01034	28637.5	11914.2	29441	11405.4	11182.6	6643.18	16723.3	0.416034	-1.26523
175	sp|P80067|CATC_RAT	Dipeptidyl peptidase 1 OS=Rattus norvegicus OX=10116 GN=Ctsc PE=1 SV=3	3.6324	0.00459	7172.26	2940.4	7168.31	2530.61	2405.67	1535.12	4231.87	0.409968	-1.28642
176	tr|F1LMQ4|F1LMQ4_RAT	Phospholipase A(2) OS=Rattus norvegicus OX=10116 GN=Pla2g4c PE=4 SV=3	2.71052	0.02191	8089.95	3307.75	7981.22	3447.86	3450.68	2601.83	4782.19	0.408872	-1.29028
177	tr|A0A0G2K8K0|A0A0G2K8K0_RAT	Splicing factor proline and glutamine-rich OS=Rattus norvegicus OX=10116 GN=Sfpq PE=1 SV=1	5.57985	0.00023	53931.2	21891.8	53346.6	20054.4	5143.78	13090.6	32039.4	0.405921	-1.30073
178	tr|F7EL36|F7EL36_RAT	Acidic leucine-rich nuclear phosphoprotein 32 family member A OS=Rattus norvegicus OX=10116 GN=Anp32a PE=1 SV=2	5.1648	0.00042	67444.6	26984	68764.4	19134.8	8370.94	17266.9	40460.6	0.400092	-1.3216
179	sp|Q5I0E7|TMED9_RAT	Transmembrane emp24 domain-containing protein 9 OS=Rattus norvegicus OX=10116 GN=Tmed9 PE=1 SV=1	3.8677	0.00312	4052.8	1621.48	4478.79	1687.66	1232.64	922.807	2431.32	0.400089	-1.32161
180	sp|P97584|PTGR1_RAT	Prostaglandin reductase 1 OS=Rattus norvegicus OX=10116 GN=Ptgr1 PE=2 SV=3	4.62542	0.00094	26955.1	10781	27114.5	9018.18	6003.83	6108.96	16174.1	0.399961	-1.32207
181	sp|P61983|1433G_RAT	14-3-3 protein gamma OS=Rattus norvegicus OX=10116 GN=Ywhag PE=1 SV=2	9.51742	2.4965e-06	39281.9	15693.9	36011.7	15397.2	5611.76	2315.79	23588	0.399521	-1.32366
182	tr|B5DFD8|B5DFD8_RAT	SH3 domain-binding glutamic acid-rich-like protein OS=Rattus norvegicus OX=10116 GN=Sh3bgrl PE=1 SV=1	4.68296	0.00086	13919.3	5442.47	13725.9	4959.72	1387.21	4211.36	8476.87	0.391001	-1.35476
183	sp|P23457|DIDH_RAT	3-alpha-hydroxysteroid dehydrogenase OS=Rattus norvegicus OX=10116 GN=Akr1c9 PE=1 SV=1	3.16887	0.01001	20316.3	7873.34	18900.4	7468.85	9055.3	3242.2	12443	0.387538	-1.36759
184	sp|Q9QYL8|LYPA2_RAT	Acyl-protein thioesterase 2 OS=Rattus norvegicus OX=10116 GN=Lypla2 PE=1 SV=1	4.28697	0.00159	8367.71	3158.7	8279.46	3663.93	2679.74	1295.18	5209.01	0.377487	-1.4055
185	sp|Q794E4|HNRPF_RAT	Heterogeneous nuclear ribonucleoprotein F OS=Rattus norvegicus OX=10116 GN=Hnrnpf PE=1 SV=3	6.62993	5.8544e-05	62066	22946.5	63884	18565.4	6099.45	13102.9	39119.4	0.369712	-1.43553
186	sp|P47728|CALB2_RAT	Calretinin OS=Rattus norvegicus OX=10116 GN=Calb2 PE=1 SV=1	4.87456	0.00065	4520.57	1625.78	4272.4	1870.16	1003.02	1053.54	2894.78	0.359642	-1.47537
187	sp|Q641Y2|NDUS2_RAT	NADH dehydrogenase [ubiquinone] iron-sulfur protein 2, mitochondrial OS=Rattus norvegicus OX=10116 GN=Ndufs2 PE=1 SV=1	5.50455	0.00026	16529	5773.89	16414.4	6454.01	2830.68	3859.08	10755.1	0.349319	-1.51738
188	sp|P21670|PSA4_RAT	Proteasome subunit alpha type-4 OS=Rattus norvegicus OX=10116 GN=Psma4 PE=1 SV=1	6.38681	7.966e-05	29047.5	9828.62	29500.3	12201	2950.55	6754.56	19218.9	0.338364	-1.56335
189	sp|P19234|NDUV2_RAT	NADH dehydrogenase [ubiquinone] flavoprotein 2, mitochondrial OS=Rattus norvegicus OX=10116 GN=Ndufv2 PE=1 SV=2	4.40766	0.00132	56637.2	18685.9	60858.9	13454.4	15928.8	13823.8	37951.3	0.329923	-1.5998
190	tr|Q6TXE9|Q6TXE9_RAT	Prolyl-tRNA synthetase OS=Rattus norvegicus OX=10116 GN=Eprs PE=1 SV=1	4.56282	0.00104	4433.65	1459.35	4225.22	1432.85	1107.85	1149.86	2974.3	0.329153	-1.60317
191	sp|P19804|NDKB_RAT	Nucleoside diphosphate kinase B OS=Rattus norvegicus OX=10116 GN=Nme2 PE=1 SV=1	2.82729	0.01793	17920.2	5766.15	17727.7	4728.99	9788.83	3880.55	12154.1	0.321768	-1.63591
192	tr|Q9JMB3|Q9JMB3_RAT	Erythrocyte membrane protein band 4.1-like 3 OS=Rattus norvegicus OX=10116 GN=Epb41l3 PE=1 SV=1	2.9119	0.01551	5379.51	1722.93	4827.91	1152.57	2581.37	1672.65	3656.58	0.320276	-1.64261
193	tr|D3ZN21|D3ZN21_RAT	RNA helicase OS=Rattus norvegicus OX=10116 GN=Ddx3y PE=1 SV=1	5.03795	0.00051	13735.3	4323.81	14369.6	4623.28	4504.67	804.424	9411.48	0.314796	-1.66751
194	sp|Q9JHL4|DBNL_RAT	Drebrin-like protein OS=Rattus norvegicus OX=10116 GN=Dbnl PE=1 SV=1	3.23469	0.00895	4216.51	1296.06	4810.22	1021.93	1749.32	1353.05	2920.45	0.307377	-1.70192
195	tr|A0A0G2K531|A0A0G2K531_RAT	Glutathione peroxidase OS=Rattus norvegicus OX=10116 GN=Gpx3 PE=1 SV=1	4.49194	0.00116	40085	12316.4	46508.9	12002.5	12502	8543.58	27768.6	0.307257	-1.70248
196	sp|Q9R1T1|BAF_RAT	Barrier-to-autointegration factor OS=Rattus norvegicus OX=10116 GN=Banf1 PE=1 SV=1	23.7595	3.9607e-10	76945.8	23235.9	75534.1	24422.1	4686.58	2949.04	53709.8	0.301978	-1.72749
197	tr|F1LPR6|F1LPR6_RAT	Immunoglobulin heavy constant mu OS=Rattus norvegicus OX=10116 PE=1 SV=3	4.32776	0.00149	14601.4	4378.13	16646.5	4415.97	5732.57	786.849	10223.3	0.299843	-1.73772
198	sp|O35796|C1QBP_RAT	Complement component 1 Q subcomponent-binding protein, mitochondrial OS=Rattus norvegicus OX=10116 GN=C1qbp PE=1 SV=2	5.5715	0.00024	35935.8	10646.6	38071.9	10389.2	6597.09	8949.57	25289.2	0.296268	-1.75502
199	sp|P00406|COX2_RAT	Cytochrome c oxidase subunit 2 OS=Rattus norvegicus OX=10116 GN=Mtco2 PE=1 SV=3	4.42844	0.00128	189203	54117	199028	40937.7	47841.5	57395.2	135086	0.286027	-1.80578
200	sp|Q9Z1N1|F16P2_RAT	Fructose-1,6-bisphosphatase isozyme 2 OS=Rattus norvegicus OX=10116 GN=Fbp2 PE=1 SV=1	4.04552	0.00234	11723.9	2760.32	11919.4	2926.49	5355.2	881.771	8963.61	0.235443	-2.08655
201	sp|Q6JE36|NDRG1_RAT	Protein NDRG1 OS=Rattus norvegicus OX=10116 GN=Ndrg1 PE=1 SV=1	2.71351	0.0218	7610.67	1786.9	7717.36	1990.53	5228.13	551.316	5823.77	0.234789	-2.09056
202	tr|F1LPM3|F1LPM3_RAT	Sorbin and SH3 domain-containing protein 2 OS=Rattus norvegicus OX=10116 GN=Sorbs2 PE=1 SV=2	3.36705	0.00716	34206.1	7853.14	33934.1	3566.14	16130.5	10361.1	26353	0.229583	-2.12291
203	tr|Q66WT9|Q66WT9_RAT	Clathrin-assembly lymphoid myeloid leukemia protein OS=Rattus norvegicus OX=10116 GN=Picalm PE=1 SV=1	6.39958	7.8367e-05	6286.45	1366.85	6369.82	436.803	953.18	1623.94	4919.6	0.217428	-2.20139
204	sp|P17220|PSA2_RAT	Proteasome subunit alpha type-2 OS=Rattus norvegicus OX=10116 GN=Psma2 PE=1 SV=3	4.56031	0.00104	26553.1	5661.65	27940.2	4859.73	10343.5	4351.18	20891.4	0.21322	-2.22958
205	tr|F1LT36|F1LT36_RAT	Ribosomal protein S10-like 1 OS=Rattus norvegicus OX=10116 GN=Rps10l1 PE=3 SV=2	3.8471	0.00323	33377.7	6991.17	40241.6	7810.54	16173.9	4545.73	26386.6	0.209456	-2.25528
206	sp|Q6NYB7|RAB1A_RAT	Ras-related protein Rab-1A OS=Rattus norvegicus OX=10116 GN=Rab1A PE=1 SV=3	5.94067	0.00014	26055.9	5302.4	23212.9	4798.78	7362.24	4361.54	20753.5	0.203501	-2.29689
207	tr|F1LS29|F1LS29_RAT	Calcium-activated neutral proteinase 1 OS=Rattus norvegicus OX=10116 GN=Capn1 PE=1 SV=1	5.60319	0.00023	3033.12	604.343	2740.77	456.222	926.889	517.903	2428.78	0.199248	-2.32736
208	sp|Q63584|TMEDA_RAT	Transmembrane emp24 domain-containing protein 10 OS=Rattus norvegicus OX=10116 GN=Tmed10 PE=1 SV=2	5.26686	0.00036	12752.2	2254.49	11998.9	1781.74	4321.29	2272.1	10497.7	0.176793	-2.49987
209	tr|G3V647|G3V647_RAT	Pyridoxal kinase OS=Rattus norvegicus OX=10116 GN=Pdxk PE=1 SV=1	3.61387	0.00474	1465.09	244.313	1642.77	213.843	822.832	87.2812	1220.78	0.166756	-2.58419
210	tr|B1WC26|B1WC26_RAT	N-acetylneuraminate synthase OS=Rattus norvegicus OX=10116 GN=Nans PE=1 SV=1	13.8888	7.3082e-08	17208.6	2662.81	17812.7	2647.97	2027.27	1572.01	14545.8	0.154737	-2.69211
211	tr|Q5XIJ3|Q5XIJ3_RAT	Isocitrate dehydrogenase [NAD] subunit, mitochondrial OS=Rattus norvegicus OX=10116 GN=Idh3g PE=1 SV=1	3.06452	0.01195	4858.33	743.787	4318.09	619.081	3244.36	538.648	4114.54	0.153095	-2.7075
212	tr|B0BN81|B0BN81_RAT	40S ribosomal protein S5 OS=Rattus norvegicus OX=10116 GN=Rps5 PE=1 SV=1	14.8172	3.9332e-08	73099.5	7751.9	70857.4	7605.98	8834.02	6217.83	65347.6	0.106046	-3.23724
213	sp|Q811X6|CRYL1_RAT	Lambda-crystallin homolog OS=Rattus norvegicus OX=10116 GN=Cryl1 PE=1 SV=3	9.88943	1.7599e-06	3020.47	319.303	2994.32	301.501	662.501	93.3522	2701.17	0.105713	-3.24178
214	sp|P19944|RLA1_RAT	60S acidic ribosomal protein P1 OS=Rattus norvegicus OX=10116 GN=Rplp1 PE=3 SV=1	6.58194	6.2177e-05	61006	3777.25	61687.4	360.286	20008	7299.17	57228.8	0.061916	-4.01354
215	tr|B5DFC3|B5DFC3_RAT	Protein transport protein SEC23 OS=Rattus norvegicus OX=10116 GN=Sec23a PE=1 SV=1	12.3827	2.1734e-07	19298.6	1013.96	19878.8	651.003	3479.11	989.067	18284.6	0.0525407	-4.25042
216	sp|P38918|ARK73_RAT	Aflatoxin B1 aldehyde reductase member 3 OS=Rattus norvegicus OX=10116 GN=Akr7a3 PE=1 SV=2	3.54306	0.00533	8428.32	410.535	8056.78	204.158	5524.51	453.396	8017.79	0.048709	-4.35967
217	tr|B0BN63|B0BN63_RAT	Activator of Hsp90 ATPase activity 1 OS=Rattus norvegicus OX=10116 GN=Ahsa1 PE=1 SV=1	6.58953	6.1586e-05	5455.3	196.23	5533.54	203.729	1954.34	47.6833	5259.07	0.0359705	-4.79704
218	tr|Q99JC6|Q99JC6_RAT	TAP-binding protein OS=Rattus norvegicus OX=10116 GN=Tapbp PE=1 SV=1	11.7979	3.4268e-07	4335.49	153.767	4473.24	150.799	867.812	26.3365	4181.72	0.0354671	-4.81737
219	sp|P62944|AP2B1_RAT	AP-2 complex subunit beta OS=Rattus norvegicus OX=10116 GN=Ap2b1 PE=1 SV=1	2.91869	0.01533	2057.35	71.9191	1743.72	98.5333	1665.3	56.6474	1985.43	0.0349571	-4.83827
220	tr|D4A6G6|D4A6G6_RAT	40S ribosomal protein S19 OS=Rattus norvegicus OX=10116 GN=LOC100362339 PE=3 SV=1	9.78616	1.9371e-06	25003	512.437	25958.2	509.833	6124.16	268.187	24490.6	0.020495	-5.60858
221	sp|P36972|APT_RAT	Adenine phosphoribosyltransferase OS=Rattus norvegicus OX=10116 GN=Aprt PE=1 SV=1	3.31124	0.00786	15193.4	200.124	15317.6	167.764	11088.4	250.115	14993.3	0.0131718	-6.24641
222	tr|G3V8D5|G3V8D5_RAT	6-phosphogluconolactonase OS=Rattus norvegicus OX=10116 GN=Pgls PE=1 SV=1	19.5975	2.6177e-09	20566.6	215.764	20315.8	165.877	2541.52	104.079	20350.9	0.010491	-6.57471
223	tr|D3ZD97|D3ZD97_RAT	RNA helicase OS=Rattus norvegicus OX=10116 GN=Dhx15 PE=1 SV=1	6.7477	5.0565e-05	7513.36	75.3349	7150.89	84.555	2699.28	66.0747	7438.03	0.0100268	-6.64
224	tr|G3V9N8|G3V9N8_RAT	AP complex subunit beta OS=Rattus norvegicus OX=10116 GN=Ap1b1 PE=1 SV=3	2.4362	0.03508	924.995	0	614.807	0	930.042	0	924.995	Infinity	Infinity
